# Supplementary material for: Identifying the latent classes of modifiable risk behaviours among diabetic and hypertensive individuals in Northeastern India: a population-based cross-sectional study
Source: PubMed Central journal article supplement — BMJ Open. 2022 Feb 23;12(2):e053757. doi: 10.1136/bmjopen-2021-053757 (PMC8883275; doi:10.1136/bmjopen-2021-053757), 2022-02-23
Supplement: bmjopen-2021-053757.draft_revisions.pdf [file bmjopen-2021-053757.draft_revisions.pdf]

# BMJ Open

BMJ Open is committed to open peer review. As part of this commitment we make the peer review history of every article we publish publicly available.

When an article is published we post the peer reviewers' comments and the authors' responses online. We also post the versions of the paper that were used during peer review. These are the versions that the peer review comments apply to.

The versions of the paper that follow are the versions that were submitted during the peer review process. They are not the versions of record or the final published versions. They should not be cited or distributed as the published version of this manuscript.

BMJ Open is an open access journal and the full, final, typeset and author-corrected version of record of the manuscript is available on our site with no access controls, subscription charges or pay-per-view fees (<http://bmjopen.bmj.com>).

If you have any questions on BMJ Open's open peer review process please email [info.bmjopen@bmj.com](mailto:info.bmjopen@bmj.com)

# BMJ Open

## Identify the latent class of modifiable risk behaviours among diabetic and hypertensive patients in Northeast India: a population-base cross-sectional study

|                               |                                                                                                                                                                                                                                                                                                           |
|-------------------------------|-----------------------------------------------------------------------------------------------------------------------------------------------------------------------------------------------------------------------------------------------------------------------------------------------------------|
| Journal:                      | <i>BMJ Open</i>                                                                                                                                                                                                                                                                                           |
| Manuscript ID                 | bmjopen-2021-053757                                                                                                                                                                                                                                                                                       |
| Article Type:                 | Original research                                                                                                                                                                                                                                                                                         |
| Date Submitted by the Author: | 25-May-2021                                                                                                                                                                                                                                                                                               |
| Complete List of Authors:     | Marbaniang, Strong P; International Institute for Population Sciences, Public Health and Mortality Studies<br>Lhungdim, Hemkothang; International Institute for Population Sciences, Public Health and Mortality Studies<br>Chungkham, Holendro; Indian Statistical Institute North-East Centre at Tezpur |
| Keywords:                     | Hypertension < CARDIOLOGY, General diabetes < DIABETES & ENDOCRINOLOGY, Epidemiology < TROPICAL MEDICINE                                                                                                                                                                                                  |
|                               |                                                                                                                                                                                                                                                                                                           |

SCHOLARONE™  
Manuscripts

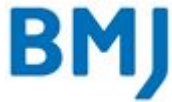

I, the Submitting Author has the right to grant and does grant on behalf of all authors of the Work (as defined in the below author licence), an exclusive licence and/or a non-exclusive licence for contributions from authors who are: i) UK Crown employees; ii) where BMJ has agreed a CC-BY licence shall apply, and/or iii) in accordance with the terms applicable for US Federal Government officers or employees acting as part of their official duties; on a worldwide, perpetual, irrevocable, royalty-free basis to BMJ Publishing Group Ltd ("BMJ") its licensees and where the relevant Journal is co-owned by BMJ to the co-owners of the Journal, to publish the Work in this journal and any other BMJ products and to exploit all rights, as set out in our [licence](#).

The Submitting Author accepts and understands that any supply made under these terms is made by BMJ to the Submitting Author unless you are acting as an employee on behalf of your employer or a postgraduate student of an affiliated institution which is paying any applicable article publishing charge ("APC") for Open Access articles. Where the Submitting Author wishes to make the Work available on an Open Access basis (and intends to pay the relevant APC), the terms of reuse of such Open Access shall be governed by a Creative Commons licence – details of these licences and which [Creative Commons](#) licence will apply to this Work are set out in our licence referred to above.

Other than as permitted in any relevant BMJ Author's Self Archiving Policies, I confirm this Work has not been accepted for publication elsewhere, is not being considered for publication elsewhere and does not duplicate material already published. I confirm all authors consent to publication of this Work and authorise the granting of this licence.

1  
2  
3 **Identify the latent class of modifiable risk behaviours among diabetic and hypertensive**  
4 **patients in Northeast India: a population-base cross-sectional study**  
5

6 **Strong P Marbaniang<sup>1\*</sup>, Hemkothang Lhungdim<sup>1</sup>, Holendro Singh Chungkham<sup>2</sup>**  
7  
8

9  
10 <sup>1</sup>Department of Public Health & Mortality Studies, International Institute for Population  
11 Sciences, Mumbai-400088, Maharashtra, India.

12  
13 <sup>2</sup>Indian Statistical Institute, North-East Centre, Tezpur-784501, Assam, India  
14

15  
16  
17 \*Corresponding author

18 **Strong P Marbaniang**

19 **Email address-** [strongmarbaniang@yahoo.com](mailto:strongmarbaniang@yahoo.com)  
20  
21

22  
23  
24 **MeSh Keywords:**

25 Type 2 Diabetes ; Hypertension, Alcohol Drinking, Smoking; Latent Class Analysis.  
26  
27

28 **Word Count:** 3281 words  
29  
30  
31  
32  
33  
34  
35  
36  
37  
38  
39  
40  
41  
42  
43  
44  
45  
46  
47  
48  
49  
50  
51  
52  
53  
54  
55  
56  
57  
58  
59  
60

## Abstract

**Objective:** To identify the latent class of modifiable risk factors among the diabetic and hypertensive patients based on the observed indicators variables: smoking, alcohol, aerated drinks, overweight or obesity, diabetes, and hypertension. It is hypothesized that the study population diagnosed with diabetes or hypertension is homogeneous with respect to the modifiable risk factors.

**Design:** A cross-sectional study was conducted using the national representative large scale survey data.

**Setting and participants:** The data comes from the Indian National Family Health Survey (NFHS-4), 2015-16. Participants aged 15-49 years who were diagnosed with either diabetes or hypertension, or both were included. The total sample is 22,249, out of which 3,284 were males, and 18,965 were females.

**Primary and secondary outcome measures:** The observed variables used as latent indicators are: smoking, alcohol, aerated drinks, overweight or obesity, diabetes, and hypertension. The concomitant variables include age, gender, education, marital status, and household wealth index. Latent class model was used to simultaneously identify the latent class and to determine the association between the concomitant variables and the latent class.

**Results:** Three latent classes were identified and labelled as Class 1: “Diabetic with low-risk lifestyle” (21%), Class 2: “High-risk lifestyle” (8%), and Class 3: “Hypertensive with low-risk lifestyle” (71%). Class 1 had a high probability of having diabetes and low probability of smoking and drinking alcohol. Class 2 respondents were characterized by high probability of smoking and drinking alcohol and Class 3 is characterized by high probability of having high blood pressure and low probability of smoking and drinking alcohol.

**Conclusions:** Male should manage smoking and alcohol consumption, while females should control body weight and blood pressure. Marital status and gender could be the preventive factors for high-risk smoking and alcohol drinking in Northeast India

**Keywords:** Modifiable risk; Diabetes; Hypertension; Latent class analysis; Northeast India.

### Strengths and limitations of the study

- The sample for the study is relatively large as it used nationally representative large-scale data.
- Respondents' status of diabetes and hypertension is diagnosed using the biomarker measurement.
- Latent class analysis is a person-centred technique and the appropriate method for explaining the clustering of health risk behaviours.
- The cross-sectional design of the study restricts us to measure the causal effect.
- Modifiable risk factors were collected based on dichotomous response which limits us to measure the intensity of substance use.

## Introduction

Effective lifestyle modification plans and affordable approaches to control high blood sugar and high blood pressure level would benefit the at-risk population [1,2]. The leading causes of mortality due to chronic disease in adults, particularly older adults, are linked to unhealthy lifestyle and behaviours [3], like tobacco consumption, physical inactivity, excess alcohol consumption, and poor diet. Usually, most risk behaviours exist simultaneously or cluster within individuals [4]. It is argued that lifestyle risk factors within individuals are not random but more likely to cluster with other unhealthy behaviours [5,6]. In Asia, for example, almost 43.5% of Chinese adults and 37% of Korean adults had at least two cardiovascular risk factors [4,7]. Moreover, in India, 35.64% of adult men and 10% of adult women had at least three lifestyle risk factors [8].

Latent Class Analysis (LCA), based on structural equation modelling, is a person-centred analytical approach that allows the identification of homogeneous sub-groups in a heterogeneous population. LCA is similar to cluster analysis because individuals are classifying into homogenous unobserved (latent) groups based on the response pattern to a set of observed variables. However, in cluster analysis, objects are classified based on distance measures, whereas in LCA classification are based on probabilistic and finite mixture modelling approach [9,10]. A latent class model splits the population into mutually exclusive and exhaustive groups that are homogeneous within the groups but differ among them. Several studies have adopted the LCA approach to identify risk factors clustering within the heterogeneous population. In a study by Dey et al, based on seven observed risk factors, LCA was used to classify individuals into two latent class “susceptible to adverse health outcomes groups” and “not susceptible to adverse health outcomes groups” [11]. Another study from China applied LCA to ten observed complications and comorbidities of T2 diabetic patients and categorized the individuals into four latent classes, namely "complications and comorbidity groups", "high risk of complications group", “high risk of comorbidities and Cardio Vascular Disease groups”, and “diabetes without complications and comorbidities group” [12]. A study in West Azerbaijan province among the hypertensive patients aged 50 years and above used four indicators such as dietary patterns, physical activity, tobacco use, and high blood pressure control to categorized the hypertensive patients into three latent classes [13].

The majority of studies reported a higher prevalence of smoking, excess alcohol consumption, physical inactivity, and poor diet among people with diabetes or hypertension

1  
2  
3 than those without diabetes or hypertension [14,15]. Notably, previous studies have examined  
4 diabetic or hypertensive patients as a single homogeneous group without considering the  
5 possible heterogeneity existing within the population [16]. Identifying the clustered pattern of  
6 modified risk factors for diabetes and hypertension and the socio-demographic factors  
7 associated with clusters of unhealthy lifestyle behaviours allows health intervention program  
8 to target these risk factors simultaneously and effectively.  
9

10  
11  
12  
13  
14 Most of the existing studies on health risk behaviours have emphasized only changing  
15 a single unhealthy behaviour [15,17]. However, interventions that simultaneously targets these  
16 unhealthy behaviours are necessary from the policy point of view [4]. In addition, existing  
17 studies in India on clustering of Non Communicable disease (NCD) risk factors have used  
18 intraclass correlation and scoring methods [8,18,19]. However, studies have suggested that  
19 LCA is the most appropriate method for explaining the clustering of health risk behaviours  
20 [20,21]. LCA is a probabilistic model approach designed for identifying clusters based on  
21 dichotomous variables. This study is the first in Northeast India to explore the clustering of  
22 NCD risk factors using the LCA approach. This study aims to identify the latent class of  
23 modifiable risk factors among diabetic and hypertensive patients based on the observed  
24 indicators variables: smoking, alcohol, aerated drinks, overweight or obesity, diabetes, and  
25 hypertension. We applied LCA to investigate heterogeneity in the population of an individual  
26 with diabetes and hypertension and to identify possible latent class based on the response of  
27 observed risk factors. More specifically, the objective is to describe how individuals in  
28 Northeast India diagnosed with diabetes or hypertension are clustered according to the pattern  
29 of observed risk factors and identify the difference between these groups based on socio-  
30 demographic characteristics. We hypothesize that the study population diagnosed with diabetes  
31 or hypertension is homogeneous with respect to the modifiable risk factors.  
32  
33  
34  
35  
36  
37  
38  
39  
40  
41  
42  
43  
44  
45

## 46 **Methods**

### 47 ***Study location***

48  
49 The study focuses on the Northeastern region of India comprising eight states, namely Assam,  
50 Arunachal Pradesh, Manipur, Meghalaya, Mizoram, Nagaland, Sikkim, and Tripura (Figure 1).  
51 The region has a hilly terrain inhabited mainly by tribal people belonging to different cultures  
52 and ethnic communities [22]. It has over 45 million, which is 3.76% of India population and a  
53 population density of 159 persons per square km [23].  
54  
55  
56  
57  
58  
59  
60



1  
2  
3 Figure 1: *Map showing the location of the Study area*  
4

5 ***Design***

6 A cross-sectional study was conducted using the national representative large scale survey data. The  
7 analysis is based on the publicly available secondary data where the identification of respondent is  
8 concealed [24].  
9  
10  
11  
12

13 ***Setting***

14  
15 The data comes from the fourth round of the Indian National Family Health Survey (NFHS-4)  
16 conducted during the year 2015-16. The data was downloaded from the DHS website [25].  
17 NFHS was initiated by the Ministry of Health and Family Welfare, Government of India, and  
18 coordinated by the International Institute for Population Sciences, Mumbai. The survey  
19 adopted a stratified two-stage sampling design. In the first stage, primary sampling units  
20 (PSUs) were selected based on probability proportional to population size. Rural PSUs were  
21 villages, while census enumeration blocks formed the PSUs in urban areas. In the second stage,  
22 systematic random sampling was done in each PSUs to select households for the sample. At  
23 the household level, information was sought from the women aged 15 – 49 years and men aged  
24 15 – 54 years. A detailed description of the survey design can be found elsewhere [24].  
25  
26  
27  
28  
29  
30  
31  
32  
33

34 ***Sample***

35 The study consists of individuals aged 15-49 years who were diagnosed with either  
36 diabetes or hypertension, or both. The total sample size is 22,249, out of which 3,284 were  
37 males, and 18,965 were females.  
38  
39  
40  
41  
42

43 ***Patient and Public Involvement***

44 No patient involved  
45  
46  
47

48 ***Measures***

49 **Diabetes:** Fingerstick blood is collected, and blood glucose level is determined using the  
50 FreeStyle Optium H Glucometer. Respondent is considered diagnosed with diabetes if the  
51 random blood sugar level is >140mg/dl [24].  
52  
53  
54  
55

56 **Hypertension:** Blood pressure level was measured using an OMRON Blood Pressure  
57 measuring device. Three separate blood pressure readings were taken with an interval of 5  
58 minutes between readings. A respondent is considered hypertensive if the systolic blood  
59  
60

1  
2  
3 pressure  $\geq 140$  mmHg, or diastolic blood pressure  $\geq 90$  mmHg, or if the respondent was taking  
4 antihypertensive medication to lower blood pressure at the time of the survey [24].  
5  
6  
7

8 **Overweight or obesity:** In this study, we categorized continuous body mass index (BMI)  
9 according to the WHO guidelines for the Asian population. A respondent was classified as  
10 overweight or obese if  $BMI \geq 23$  kg/m<sup>2</sup> [26].  
11  
12  
13

### 14 *Outcome Variables of Interest*

15  
16 **Observed Indicators variables:** The observed variables used as latent indicators are  
17 cigarette's smoking (No=1, Yes=2), Alcohol consumption (No=1, Yes=2), Takes aerated drink  
18 (No=1, Yes=2), Overweight or obesity (No=1, Yes=2), Diabetes (No=1, Yes=2), Hypertension  
19 (No=1, Yes=2).  
20  
21  
22  
23

### 24 *Predictors or Concomitant variables*

25  
26 **Concomitant variables for class determination:** The concomitant variables include age,  
27 gender, education, marital status, and household wealth index.  
28  
29  
30  
31

### 32 *Statistical Analysis*

33  
34 Latent Class Analysis is an innovative statistical method used to identify the latent classes of  
35 homogeneous individuals in a heterogeneous population [12]. The latent class was performed  
36 using the six indicators variables mentioned above. LCA uses observed dichotomous indicators  
37 to identify the unobserved latent class in a heterogeneous population. To determine the optimal  
38 number of latent class, we examined one to four model. The optimal number of latent classes  
39 was chosen based on the model having the smallest Akaike Information Criterion (AIC),  
40 Consistent Akaike Information Criterion (cAIC), Bayesian-Schwarz Information Criterion  
41 (BIC), adjusted Bayesian-Schwarz Information Criterion (aBIC), and Entropy [27,28]. A  
42 combination of parsimony and interpretability model selection criteria was used to carefully  
43 select the number of latent classes so that individuals are allocated to their most likely class.  
44 The output of the latent class analysis includes the number of latent classes, the latent class  
45 probability (i.e., the probability that an individual selected at random belonged to each latent  
46 class), and the conditional probability (i.e., the probability that an individual would give a  
47 particular response to a specific item of an observed indicator variable given that an individual  
48 belonged to a specific latent class).  
49  
50  
51  
52  
53  
54  
55  
56  
57  
58  
59  
60

To determine the association between the concomitant variables (i.e., age, gender, education, marital status, and household wealth index) and the latent class, we apply the one-step technique approach. In this approach, the concomitant variables are included in the latent class regression model, and their coefficient is estimated simultaneously as part of the latent class model [29]. This approach has been proved to provide the best and unbiased coefficient estimates of the concomitant variables as compared to other methods [30]. Statistical analysis was conducted in R statistical software, and LCA was analyzed using the poLCA package (Polychotomous Variable Latent Class Analysis) [29].

## Results

### *Descriptive Statistics*

A total of 22,249 participants with chronic disease, i.e., diagnosed with diabetes or hypertension, were included in the analysis (Table 1). The participants in the age group 45-49 and 15-19 constitute the highest (21.31%) and the lowest (5.04%) percentage shares out of the total sample. Over half (51.17%) of the sample have completed secondary education, 24.6 percent were illiterate, and 79.56 percent were currently married. Further, among the chronic patients, the prevalence of smoking, consumption of alcohol, and aerated drinks were 4.17, 14.8, and 68.57 percent, respectively. Also, 81.13 percent of the participants reported suffering from hypertension, and 27.7 percent suffered from diabetes.

**Table 1: Background characteristics of diabetes and hypertensive patients aged 15-49 years, NFHS-4, 2015-16.**

| Background Characteristics | % (n=22,249) |
|----------------------------|--------------|
| <b>Age</b>                 |              |
| 15-19                      | 5.04         |
| 20-24                      | 8.38         |
| 25-29                      | 12.17        |
| 30-34                      | 14.96        |
| 35-39                      | 19.19        |
| 40-44                      | 18.95        |
| 45-49                      | 21.31        |
| <b>Sex</b>                 |              |
| Male                       | 13.88        |
| Female                     | 86.12        |
| <b>Education</b>           |              |
| Illiterate                 | 24.6         |
| Primary                    | 16.3         |

|                            |       |
|----------------------------|-------|
| Secondary                  | 51.17 |
| Higher Secondary           | 7.93  |
| <b>Marital Status</b>      |       |
| Never married              | 13.57 |
| Married                    | 79.56 |
| Widowed/Divorced/Separated | 6.87  |
| <b>Wealth Index</b>        |       |
| Poorest                    | 16.72 |
| Poorer                     | 34.55 |
| Middle                     | 22.44 |
| Richer                     | 17.5  |
| Richest                    | 8.79  |
| <b>Observed Indicators</b> |       |
| Smoking                    | 4.17  |
| Drink alcohol              | 14.8  |
| Take aerated drinks        | 68.57 |
| Overweight or Obesity      | 43.26 |
| Diabetes                   | 27.7  |
| Hypertension               | 81.13 |

### *Model fit and selection of Latent class*

The model selection statistics for models are shown in Table 2. We fit the LCA models with classes ranging from 1 to 4. For each LCA model, the model fit indicators BIC, AIC, cAIC, and Entropy were calculated. According to the model fit indicators, a 3-Class model was selected as the best fit model as it has the lowest BIC, cAIC, and Entropy values. These three latent classes were labelled as “Diabetic with low-risk lifestyle”, “High-risk lifestyle”, and “Hypertensive with low-risk lifestyle”. Figure 2 portrays the graphical representation of item response probability for the indicator’s variables across the latent classes.

**Table 2: Model fit statistics for the latent class models (n=22,249)**

| No of classes | log-likelihood | Residual df | BIC      | aBIC     | cAIC     | likelihood-ratio | Entropy |
|---------------|----------------|-------------|----------|----------|----------|------------------|---------|
| 1             | -69173.11      | 57          | 138406.3 | 138387.2 | 138412.3 | 17350.762        | -       |
| 2             | -61315.38      | 34          | 122921   | 122828.9 | 122950   | 1859.196         | 1       |
| 3             | -58920.21      | 11          | 118361   | 118195.7 | 118413   | 1168.644         | 0.91    |
| 4             | -59970.1       | -12         | 120691   | 120452.6 | 120766   | 2396.112         | 0.94    |

Latent class probability and the conditional probability of a “Yes” response for each indicator variables were summarized in Table 3. The last row in Table 3 indicates the

probability of class membership in each latent class. About 21 percent of the participants were expected to belong to the Class 1 “diabetic with low-risk lifestyle”, 8 percent to Class 2 “high-risk lifestyle”, and 71 percent to Class 3 “hypertensive with low-risk lifestyle”. Members in Class 1 were likely to report having high blood sugar level (diabetic) and likely to report not having smoked or drinking alcohol. Members in Class 2 are more likely to smoke and drink alcohol, and members in Class 3 are likely to report having high blood pressure and likely to report not having smoked or drink alcohol.

Figure 2: Item response conditional probability across the latent classes

Table 3: The conditional probability of the response item and the latent class probability

| Indicator Variables             | Diabetic with low-risk lifestyle (Class 1) | High-risk lifestyle (Class 2) | Hypertensive with low-risk lifestyle (Class 3) |
|---------------------------------|--------------------------------------------|-------------------------------|------------------------------------------------|
| Smoking                         | 0.04                                       | 0.55                          | 0.02                                           |
| Drink alcohol                   | 0.12                                       | 0.81                          | 0.14                                           |
| Take aerated drinks             | 0.76                                       | 0.78                          | 0.77                                           |
| Overweight or Obesity           | 0.44                                       | 0.52                          | 0.51                                           |
| Diabetic                        | 1.00                                       | 0.25                          | 0.11                                           |
| Hypertensive                    | 0.00                                       | 0.88                          | 1.00                                           |
| <b>Latent class probability</b> | <b>0.21</b>                                | <b>0.08</b>                   | <b>0.71</b>                                    |

### *Covariates predicting latent class membership*

Table 4 summarized the odds ratio (OR) from the latent regression model. Compared with respondents in the 15-19 years age group, those in the 20-29 age group were 4.1 times (OR=4.10) more likely to belong to class 2 (high-risk lifestyle) than to class 1 (diabetic with low-risk lifestyle). Similarly, compared with respondents in the 15-19 years age group, those in the 45-49 age group were 1.7 times (OR=1.73) more likely to belong to class 3 (hypertensive with low-risk lifestyle) than to class 1 (diabetic with low-risk lifestyle). Also, we observed that the odds of being in class 3 increases with the age of the respondents. With respect to males, females were less likely (OR=0.002) to belong to class 2 but more likely (OR=1.46) to belong to class 3. Higher odds of being in class 2-3 than to class 1 was observed among the married respondents (OR=1.54); however, widowed/divorced/separated were more likely to be in class 2 (OR=3.35), but less likely to be in class 3 (OR=0.98). Moreover, compared to the illiterate respondents, those with higher secondary education were less likely to belong to class 3 than

to class 1 (OR=0.79), and being in the richest quantile of wealth index lower the odds of being in class 3 than in class 1 (OR=0.69).

**Table 4: The latent classes of lifestyle behaviours and their associated covariates among individuals aged 15-49 years**

| Background Characteristics | Class 2 vs Class 1 |      | Class 3 vs Class 1 |      |
|----------------------------|--------------------|------|--------------------|------|
|                            | Odds Ratio         | S. E | Odds Ratio         | S. E |
| <b>Age</b>                 |                    |      |                    |      |
| 15-19                      | Ref                |      | Ref                |      |
| 20-24                      | 4.10 ***           | 0.25 | 1.27 **            | 0.09 |
| 25-29                      | 5.10 ***           | 0.25 | 1.34 ***           | 0.09 |
| 30-34                      | 5.70 ***           | 0.26 | 1.42 ***           | 0.09 |
| 35-39                      | 3.53 ***           | 0.26 | 1.42 ***           | 0.09 |
| 40-44                      | 3.82 ***           | 0.27 | 1.51 ***           | 0.09 |
| 45-49                      | 3.46 ***           | 0.27 | 1.73 ***           | 0.09 |
| <b>Gender</b>              |                    |      |                    |      |
| Male                       | Ref                |      | Ref                |      |
| Female                     | 0.002 ***          | 0.34 | 1.46 ***           | 0.07 |
| <b>Education</b>           |                    |      |                    |      |
| Illiterate                 | Ref                |      | Ref                |      |
| Primary                    | 1.03               | 0.19 | 0.73 ***           | 0.06 |
| Secondary                  | 1.08               | 0.17 | 0.79 ***           | 0.05 |
| Higher Secondary           | 0.70               | 0.21 | 0.79 ***           | 0.08 |
| <b>Marital Status</b>      |                    |      |                    |      |
| Never married              | Ref                |      | Ref                |      |
| Married                    | 1.54 **            | 0.15 | 1.16 **            | 0.06 |
| Widowed/Divorced/Separated | 3.35 ***           | 0.35 | 0.98               | 0.08 |
| <b>Wealth Index</b>        |                    |      |                    |      |
| Poorest                    | Ref                |      | Ref                |      |
| Poorer                     | 0.90               | 0.18 | 1.00               | 0.06 |
| Middle                     | 1.02               | 0.18 | 0.87 **            | 0.07 |
| Richer                     | 1.14               | 0.19 | 0.86 *             | 0.07 |
| Richest                    | 1.13               | 0.22 | 0.69 ***           | 0.08 |

Ref: Reference group; \*\*\*p-value<0.01; \*\*p-value<0.05; \*p-value<0.1; S.E: Standard Error; Reference group: Class 1

## Discussion

This study is the first in Northeast India that used latent class analysis to provides evidence about the pattern of modifiable risk factors among patients with diabetes or hypertension. Based on the response modifiable health risk behaviours, the LCA suggest three classes of respondents with diabetes or hypertension. These classes were characterized as “diabetic with low-risk lifestyle”, “high-risk lifestyle”, and “hypertensive with low-risk lifestyle”.

More than 70 percent of the respondents belonged to the class “hypertensive with low-risk lifestyle”, which is they have their blood pressure level higher than normal and less likely

1  
2  
3 to smoke. Several studies have acknowledged a significant elevation in blood pressure and an  
4 increase in the prevalence of hypertension following smoking cessation [31,32], which is  
5 possibly due to post-cessation weight gain [32]. Moreover, about 8 per cent of the respondents  
6 belonged to the class “high-risk lifestyle”, mostly drink alcohol and smoke cigarette. This co-  
7 occurrence of alcohol use and cigarette smoking have been well documented in the existing  
8 studies [33,34]. In all the three identified classes, a vast majority of diabetic or hypertensive  
9 patients have a habit of consuming aerated drinks and have uncontrolled body weight. Studies  
10 suggest that sugar-sweetened beverages intake is the major contributor to weight gain and can  
11 increase the risk of T2 diabetes and hypertension [35,36]. Also, evidence from the study in  
12 Northeast India supports the positive correlation between overweight or obesity with diabetes  
13 and hypertension [16].

14  
15  
16  
17  
18  
19  
20  
21  
22  
23 In line with the previous study [37], this study found that members aged 20 years and  
24 above are more likely to be in the high-risk cluster than the members below 20 years. Studies  
25 have explained that the teenage period is just the initial stage where an individual starts using  
26 or gets exposed to alcohol or smoking products. However, as this behaviour becomes a habit  
27 later, it may subsequently increase the intensity of substance use among older adults [38,39].  
28 Also, it is well documented that starting to smoke and drink alcohol at an early age is associated  
29 with the number of cigarettes smoked and the quantity of alcohol consumed per day in adult  
30 age. According to Dawson, (2008) and Investigator, (1991), individuals who began to smoke  
31 or drink before the age of 20 years were most likely to consume a large volume of alcohol  
32 and smoked more cigarettes per day as compared to those who started to smoke at the age of  
33 20 or above [40,41]. Further, compared to young adults, older adults were more likely to report  
34 high blood pressure and less likely to smoke or drink alcohol. One reason could be the existing  
35 condition of high blood pressure; an older adult was most likely to have taken a precaution by  
36 lowering or quitting smoking and alcohol consumption to prevent further deterioration of  
37 health. Evidence from a recent study among older adults demonstrated that the main reason for  
38 smoking cessation attempt was the motivation towards better health [42]. It has been mentioned  
39 that hypertensive smokers were encouraged to quit smoking because of the risk of developing  
40 a severe form of hypertension such as malignant and renovascular hypertension [43]. Gender  
41 was found to be significantly associated with class 2 “high-risk lifestyle” and 3 “hypertensive  
42 with low-risk lifestyle”. Consistent with the previous studies, in this study, female’s  
43 respondents were less likely to be in the high-risk cluster than males’ respondents [44]. One  
44 primary reason is that smoking and drinking alcohol by women is not socially and culturally  
45  
46  
47  
48  
49  
50  
51  
52  
53  
54  
55  
56  
57  
58  
59  
60

1  
2  
3 accepted by many [45], and women are more concerned about their health and tend to avoid  
4 unhealthy lifestyle behaviour [46]. In our study, individuals from a wealthier household with a  
5 higher level of education were less likely to belong to a cluster of hypertensives with low  
6 substance use. An individual with higher education and better income can afford to pay for a  
7 healthier lifestyle, including regular physical exercise, accessibility to advanced and quality  
8 healthcare services; such efforts may reduce the risk of hypertension [47,48]. Being  
9 widowed/divorced/separated increased the likelihood of membership in the high-risk cluster.  
10 Studies about substance use by marital status have indicated that widowed or divorced  
11 individuals are most likely to consumed alcohol, cigarette, and marijuana as compared to  
12 singles [49,50].  
13  
14  
15  
16  
17  
18  
19

20  
21 To our knowledge, no study in India or Northeast India has study the clustering of  
22 health risk factor using the latent class approach. However, our study has some limitation.  
23 Firstly, the cross-sectional design of the study restricts us to measure the causal effect.  
24 Secondly, due to the dichotomous response on alcohol consumption, we cannot measure the  
25 quantity of alcohol an individual consumed.  
26  
27  
28  
29

### 30 **Conclusions**

31  
32 This study identified three classes based on modifiable risk factors closely related to the risk  
33 of chronic disease. In addition, the study also identified factors that uniquely distinguished the  
34 identified classes. The intake of aerated drinks and obesity are the common modifiable risk  
35 factors in all three classes. As an initiative to healthy lifestyle behaviours, the findings suggest  
36 that males should control smoking and alcohol consumption, while females should control  
37 body weight and blood pressure. Further, we found that marital status and gender could be the  
38 preventive factors for high-risk smoking and alcohol drinking in Northeast India.  
39  
40  
41  
42  
43  
44

45 **Contributors:** Conceived and designed the research paper: SPM, HL. Analysed the data: SPM,  
46 HSC. Contributed agents/materials/analysis tools: SPM, HL, HSC. Wrote the manuscript:  
47 SPM, HSC. Refined the manuscript: SPM, HL, HSC.  
48  
49

50  
51 **Funding:** This research received no specific grant from any funding agency in the public,  
52 commercial or not-for-profit sectors.  
53  
54

55 **Competing Interest:** Non declared  
56

57  
58 **Patient consent for publication:** Not applicable  
59  
60



**Ethics approval:** This study is based on the secondary data which is publicly available from the Demographic Health Survey website and the respondents are de-identified, hence ethical approval is not required for this study.

**Data availability statement:** Data were collected and owned by the Demographic Health Survey authority. Data are available at [https://dhsprogram.com/data/dataset/India\\_Standard-DHS\\_2015.cfm?flag=1](https://dhsprogram.com/data/dataset/India_Standard-DHS_2015.cfm?flag=1) upon request.

**Word count:** 3093

## References

- 1 Chobanian A V, Bakris GL, Black HR, *et al*. The Seventh Report of the Joint National Committee on Prevention, Detection, Evaluation, and Treatment of High Blood Pressure: the JNC 7 report. *JAMA* 2003;**289**:2560–72. doi:10.1001/jama.289.19.2560
- 2 International Diabetes Federation. Advocacy guide to the IDF Diabetes Atlas Ninth edition 2019. Brussels, Belgium:International Diabetes Federation: 2019. <http://www.diabetesatlas.org/> (accessed 14 Nov 2019).
- 3 Ford ES, Zhao G, Tsai J, *et al*. Low-Risk Lifestyle Behaviors and All-Cause Mortality: Findings From the National Health and Nutrition Examination Survey III Mortality Study. *Am J Public Health* 2011;**101**:1922–9. doi:10.2105/AJPH.2011.300167
- 4 Ha S, Choi HR, Lee YH. Clustering of four major lifestyle risk factors among Korean adults with metabolic syndrome. *PLoS One* 2017;**12**:e0174567. doi:10.1371/journal.pone.0174567
- 5 Poortinga W. The prevalence and clustering of four major lifestyle risk factors in an English adult population. *Prev Med (Baltim)* 2007;**44**:124–8. doi:10.1016/j.ypmed.2006.10.006
- 6 Schuit AJ, van Loon AJM, Tijhuis M, *et al*. Clustering of Lifestyle Risk Factors in a General Adult Population. *Prev Med (Baltim)* 2002;**35**:219–24. doi:10.1006/pmed.2002.1064
- 7 Gao B, Zhang L, Wang H. Clustering of Major Cardiovascular Risk Factors and the Association with Unhealthy Lifestyles in the Chinese Adult Population. *PLoS One* 2013;**8**:e66780. doi:10.1371/journal.pone.0066780
- 8 Shaikh R, Khan J. Clustering of lifestyle risk factors among adult population in India:

- 1  
2  
3 A cross-sectional analysis from 2005 to 2016. *PLoS One* 2021;**16**:e0244559.  
4 doi:10.1371/journal.pone.0244559  
5  
6  
7  
8 9 Islam MM, Valderas JM, Yen L, *et al.* Multimorbidity and Comorbidity of Chronic  
9 Diseases among the Senior Australians: Prevalence and Patterns. *PLoS One*  
10 2014;**9**:e83783. doi:10.1371/journal.pone.0083783  
11  
12  
13 10 Brusco MJ, Shireman E, Steinley D. A comparison of latent class, K-means, and K-  
14 median methods for clustering dichotomous data. *Psychol Methods* 2017;**22**:563–80.  
15 doi:10.1037/met0000095  
16  
17  
18  
19 11 Dey A, Chakraborty A, Majumdar K, *et al.* Application of latent class analysis to  
20 estimate susceptibility to adverse health outcomes based on several risk factors. *Int J*  
21 *Community Med Public Heal* 2016;**3**:3423–9. doi:10.18203/2394-  
22 6040.ijcmph20164268  
23  
24  
25  
26 12 Gao F, Chen J, Liu X, *et al.* Latent class analysis suggests four classes of persons with  
27 type 2 diabetes mellitus based on complications and comorbidities in Tianjin, China: a  
28 cross-sectional analysis. *Endocr J* 2017;**64**:1007–16. doi:10.1507/endocrj.EJ17-0199  
29  
30  
31  
32 13 Ghanbari J, Mohammadpoorasl A, Jahangiry L, *et al.* Subgroups of lifestyle patterns  
33 among hypertension patients: a latent-class analysis. *BMC Med Res Methodol*  
34 2018;**18**:127. doi:10.1186/s12874-018-0607-6  
35  
36  
37  
38 14 Sobngwi E, Mbanya J-CN, Unwin N, *et al.* Physical activity and its relationship with  
39 obesity, hypertension and diabetes in urban and rural Cameroon. *Int J Obes*  
40 2002;**26**:1009–16. doi:10.1038/sj.ijo.0802008  
41  
42  
43  
44 15 Bani T Aeri DS. Risk Factors Associated with the Increasing Cardiovascular Diseases  
45 Prevalence in India: A Review. *J Nutr Food Sci* 2014;**05**:1–6. doi:10.4172/2155-  
46 9600.1000331  
47  
48  
49  
50 16 Marbaniang SP, Lhungdim H, Yadav B, *et al.* Overweight/obesity risks and prevalence  
51 of diabetes and hypertension in North Eastern India: An analysis using seemingly  
52 unrelated probit model. *Clin Epidemiol Glob Heal* 2021;**11**:100764.  
53 doi:10.1016/j.cegh.2021.100764  
54  
55  
56  
57 17 Umamahesh K, Vigneswari A, Surya Thejaswi G, *et al.* Incidence of cardiovascular  
58 diseases and associated risk factors among subjects with type 2 diabetes – An 11-year  
59  
60

- 1  
2  
3 follow up study. *Indian Heart J* 2014;**66**:5–10. doi:10.1016/j.ihj.2013.12.009  
4  
5  
6 18 Bischops AC, De Neve J-W, Awasthi A, *et al.* A cross-sectional study of  
7 cardiovascular disease risk clustering at different socio-geographic levels in India. *Nat*  
8 *Commun* 2020;**11**:5891. doi:10.1038/s41467-020-19647-3  
9  
10  
11 19 Sarveswaran G, Kulothungan V, Mathur P. Clustering of noncommunicable disease  
12 risk factors among adults (18–69 years) in rural population, South-India. *Diabetes*  
13 *Metab Syndr Clin Res Rev* 2020;**14**:1005–14. doi:10.1016/j.dsx.2020.05.042  
14  
15  
16  
17 20 Schreiber JB. Latent Class Analysis: An example for reporting results. *Res Soc Adm*  
18 *Pharm* 2017;**13**:1196–201. doi:10.1016/j.sapharm.2016.11.011  
19  
20  
21 21 Weller BE, Bowen NK, Faubert SJ. Latent Class Analysis: A Guide to Best Practice. *J*  
22 *Black Psychol* 2020;**46**:287–311. doi:10.1177/0095798420930932  
23  
24  
25 22 Marbaniang SP. Women Care and Practices in the Management of Childhood Diarrhea  
26 in Northeast India. *Child Care Pract* 2020;:1–13.  
27 doi:10.1080/13575279.2020.1812534  
28  
29  
30  
31 23 Dikshit KR, Dikshit JK. Population of the North-Eastern States of India. In: *North-*  
32 *East India: Land, People and Economy. Advances in Asian Human-Environmental*  
33 *Research*. Dordrecht: : Springer 2014. 421–56. doi:10.1007/978-94-007-7055-3\_12  
34  
35  
36  
37 24 International Institute for Population Sciences (IIPS) and ICF. National Family Health  
38 Survey (NFHS-4), 2015-16: India. Mumbai:IIPS: 2017. [http://rchiips.org/nfhs/NFHS-](http://rchiips.org/nfhs/NFHS-4Reports/India.pdf)  
39 [4Reports/India.pdf](http://rchiips.org/nfhs/NFHS-4Reports/India.pdf)  
40  
41  
42  
43 25 DHS. The DHS Program-India: Standard DHS, 2015-16 Dataset,. Demogr. Heal. Surv.  
44 2017.[https://dhsprogram.com/data/dataset/India\\_Standard-DHS\\_2015.cfm?flag=1](https://dhsprogram.com/data/dataset/India_Standard-DHS_2015.cfm?flag=1)  
45  
46  
47 26 Barba C, Cavalli-Sforza T, Cutter J, *et al.* Appropriate body-mass index for Asian  
48 populations and its implications for policy and intervention strategies. *Lancet*  
49 2004;**363**:157–63. doi:10.1016/S0140-6736(03)15268-3  
50  
51  
52  
53 27 Sugiura N. Further analysts of the data by akaike' s information criterion and the finite  
54 corrections. *Commun Stat - Theory Methods* 1978;**7**:13–26.  
55 doi:10.1080/03610927808827599  
56  
57  
58  
59 28 Akaike H. A New Look at the Statistical Model Identification. 1974. 215–22.  
60

- doi:10.1007/978-1-4612-1694-0\_16
- 29 Linzer DA, Lewis JB. poLCA : An R Package for Polytomous Variable Latent Class Analysis. *J Stat Softw* 2011;**42**. doi:10.18637/jss.v042.i10
- 30 Bolck A, Croon M, Hagenaars J. Estimating latent structure models with categorical variables: One-step versus three-step estimators. *Polit Anal* 2004;**12**:3–27. doi:10.1093/pan/12.1.3
- 31 Jenner DA, Puddey IB, Beilin LJ, *et al*. Lifestyle- and occupation-related changes in blood pressure over a six-year period in a cohort of working men. *J Hypertens Suppl Off J Int Soc Hypertens* 1988;**6**:S605-7. doi:10.1097/00004872-198812040-00189
- 32 Gerace TA, Hollis J, Ockene JK, *et al*. Smoking cessation and change in diastolic blood pressure, body weight, and plasma lipids. MRFIT Research Group. *Prev Med (Baltim)* 1991;**20**:602–20. doi:10.1016/0091-7435(91)90058-c
- 33 Ho RKS, Fok PWY, Chan HCH. Pattern and determinants of alcohol and tobacco co-use and its relationship with smoking cessation in Hong Kong. *Tob Prev & Cessat* 2021;**7**:1–9. doi:10.18332/tpc/132288
- 34 Jiang N, Lee YO, Ling PM. Association between tobacco and alcohol use among young adult bar patrons: a cross-sectional study in three cities. *BMC Public Health* 2014;**14**:500. doi:10.1186/1471-2458-14-500
- 35 Malik VS, Popkin BM, Bray GA, *et al*. Sugar-sweetened beverages, obesity, type 2 diabetes mellitus, and cardiovascular disease risk. *Circulation* 2010;**121**:1356–64. doi:10.1161/CIRCULATIONAHA.109.876185
- 36 Qin P, Li Q, Zhao Y, *et al*. Sugar and artificially sweetened beverages and risk of obesity, type 2 diabetes mellitus, hypertension, and all-cause mortality: a dose–response meta-analysis of prospective cohort studies. *Eur J Epidemiol* 2020;**35**:655–71. doi:10.1007/s10654-020-00655-y
- 37 Saikia N, Debbarma B. The socioeconomic correlates of substance use among male adults in Northeast India. *Clin Epidemiol Glob Heal* 2020;**8**:149–57. doi:10.1016/j.cegh.2019.06.004
- 38 IOM (Institute of Medicine). Patterns of Tobacco Use by Adolescents and Young Adults. In: Richard J. Bonnie, Kathleen Stratton LYK, ed. *Public Health Implications*

- 1  
2  
3 *of Raising the Minimum Age of Legal Access to Tobacco Products*. Washington, D.C.:  
4 : The National Academies Press 2015.  
5  
6 [https://www.ncbi.nlm.nih.gov/books/NBK310412/pdf/Bookshelf\\_NBK310412.pdf](https://www.ncbi.nlm.nih.gov/books/NBK310412/pdf/Bookshelf_NBK310412.pdf)  
7  
8
- 9 39 Maggs JL, Schulenberg JE. Initiation and Course of Alcohol Consumption among  
10 Adolescents and Young Adults. In: *Recent Developments in Alcoholism*. New York: :  
11 Kluwer Academic Publishers-Plenum Publishers 2005. 29–47. doi:10.1007/0-306-  
12 48626-1\_2  
13  
14
- 15  
16 40 Investigators S. Effect of the Age at Which Smoking Begins on Frequency of Smoking  
17 in Adulthood. *N Engl J Med* 1991;**325**:968–9. doi:10.1056/NEJM199109263251318  
18  
19
- 20  
21 41 Dawson DA, Goldstein RB, Patricia Chou S, *et al*. Age at First Drink and the First  
22 Incidence of Adult-Onset DSM-IV Alcohol Use Disorders. *Alcohol Clin Exp Res*  
23 2008;**32**:2149–60. doi:10.1111/j.1530-0277.2008.00806.x  
24  
25
- 26  
27 42 Tanihara S, Momose Y. Reasons for smoking cessation attempts among Japanese male  
28 smokers vary by nicotine dependence level: a cross-sectional study after the 2010  
29 tobacco tax increase. *BMJ Open* 2015;**5**:e006658–e006658. doi:10.1136/bmjopen-  
30 2014-006658  
31  
32
- 33  
34 43 Freitas SRS, Alvim RO. Smoking and blood pressure phenotypes: New perspective for  
35 an old problem. *Am J Hypertens* 2017;**30**:554–5. doi:10.1093/ajh/hpx039  
36  
37
- 38  
39 44 Saikia B, Marbaniang SP, Kumar P, *et al*. Changing pattern of tobacco consumption  
40 and quitting behavior in Northeast India. *J Subst Use* 2021;:1–12.  
41 doi:10.1080/14659891.2021.1875068  
42  
43
- 44  
45 45 Wilsnack RW, Wilsnack SC, Kristjanson AF, *et al*. Gender and alcohol consumption:  
46 patterns from the multinational GENACIS project. *Addiction* 2009;**104**:1487–500.  
47 doi:10.1111/j.1360-0443.2009.02696.x  
48  
49
- 50  
51 46 Nolen-Hoeksema S. Gender differences in risk factors and consequences for alcohol  
52 use and problems. *Clin Psychol Rev* 2004;**24**:981–1010. doi:10.1016/j.cpr.2004.08.003  
53  
54
- 55  
56 47 Rasiah R, Yusoff K, Mohammadreza A, *et al*. Cardiovascular disease risk factors and  
57 socioeconomic variables in a nation undergoing epidemiologic transition. *BMC Public*  
58 *Health* 2013;**13**:886. doi:10.1186/1471-2458-13-886  
59  
60
- 48 Winkleby MA, Jatulis DE, Frank E, *et al*. Socioeconomic status and health: how

1  
2  
3 education, income, and occupation contribute to risk factors for cardiovascular disease.

4  
5 *Am J Public Health* 1992;**82**:816–20. doi:10.2105/AJPH.82.6.816

6  
7 49 Menasco M, Blair S. Gender Differences in Substance Use Across Marital Statuses. *Int*  
8  
9 *J Criminol Sociol* 2016;**5**:1–13. doi:10.6000/1929-4409.2016.05.01

10  
11 50 Power C, Rodgers B, Hope S. Heavy alcohol consumption and marital status:  
12  
13 disentangling the relationship in a national study of young adults. *Addiction*  
14  
15 1999;**94**:1477–87. doi:10.1046/j.1360-0443.1999.941014774.x  
16  
17  
18  
19  
20  
21  
22  
23  
24  
25  
26  
27  
28  
29  
30  
31  
32  
33  
34  
35  
36  
37  
38  
39  
40  
41  
42  
43  
44  
45  
46  
47  
48  
49  
50  
51  
52  
53  
54  
55  
56  
57  
58  
59  
60

For peer review only

1  
2  
3  
4  
5  
6  
7  
8  
9  
10  
11  
12  
13  
14  
15  
16  
17  
18  
19  
20  
21  
22  
23  
24  
25  
26  
27  
28  
29  
30  
31  
32  
33  
34  
35  
36  
37  
38  
39  
40  
41  
42  
43  
44  
45  
46  
47  
48  
49  
50  
51  
52  
53  
54  
55  
56  
57  
58  
59  
60

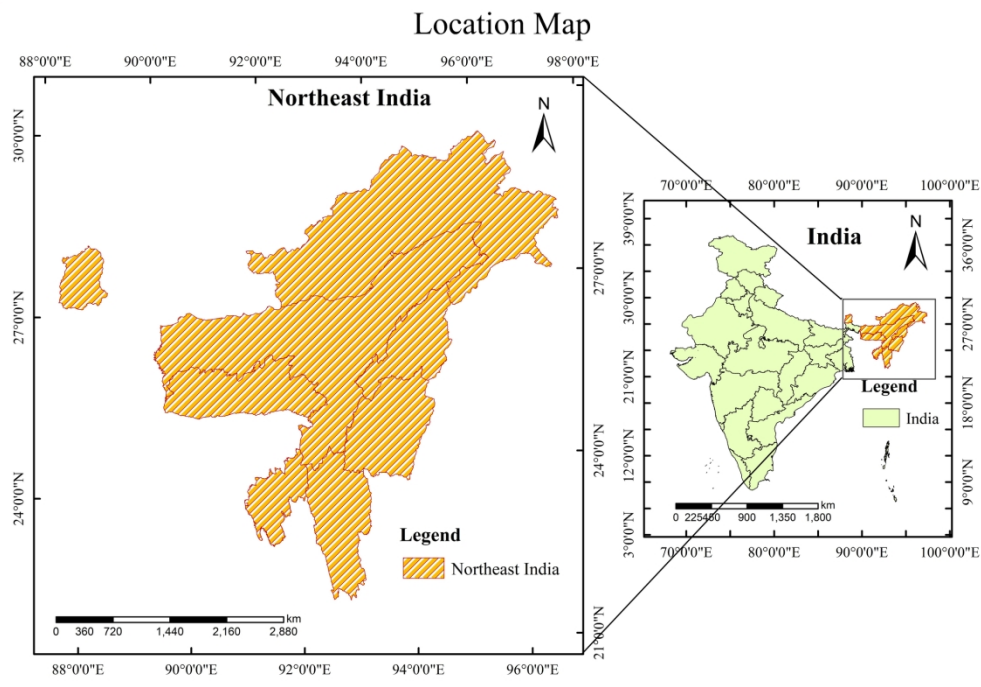

: Map showing the location of the Study area  
190x131mm (300 x 300 DPI)

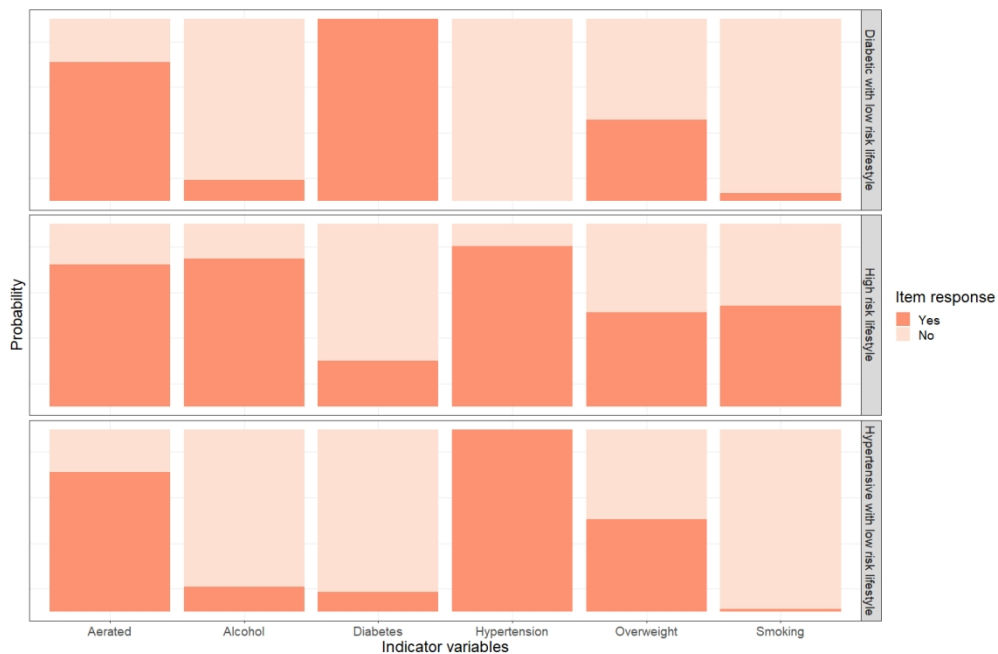

Item response conditional probability across the latent classes

129x84mm (300 x 300 DPI)



**STROBE 2007 (v4) Statement—Checklist of items that should be included in reports of *cross-sectional studies***

| Section/Topic                | Item # | Recommendation                                                                                                                                                                       | Reported on page # |
|------------------------------|--------|--------------------------------------------------------------------------------------------------------------------------------------------------------------------------------------|--------------------|
| <b>Title and abstract</b>    | 1      | (a) Indicate the study's design with a commonly used term in the title or the abstract                                                                                               | 1                  |
|                              |        | (b) Provide in the abstract an informative and balanced summary of what was done and what was found                                                                                  | 1                  |
| <b>Introduction</b>          |        |                                                                                                                                                                                      |                    |
| Background/rationale         | 2      | Explain the scientific background and rationale for the investigation being reported                                                                                                 | 4                  |
| Objectives                   | 3      | State specific objectives, including any prespecified hypotheses                                                                                                                     | 4                  |
| <b>Methods</b>               |        |                                                                                                                                                                                      |                    |
| Study design                 | 4      | Present key elements of study design early in the paper                                                                                                                              | 5                  |
| Setting                      | 5      | Describe the setting, locations, and relevant dates, including periods of recruitment, exposure, follow-up, and data collection                                                      | 5                  |
| Participants                 | 6      | (a) Give the eligibility criteria, and the sources and methods of selection of participants                                                                                          | 5                  |
| Variables                    | 7      | Clearly define all outcomes, exposures, predictors, potential confounders, and effect modifiers. Give diagnostic criteria, if applicable                                             | 6                  |
| Data sources/<br>measurement | 8*     | For each variable of interest, give sources of data and details of methods of assessment (measurement). Describe comparability of assessment methods if there is more than one group | 6                  |
| Bias                         | 9      | Describe any efforts to address potential sources of bias                                                                                                                            |                    |
| Study size                   | 10     | Explain how the study size was arrived at                                                                                                                                            | 5                  |
| Quantitative variables       | 11     | Explain how quantitative variables were handled in the analyses. If applicable, describe which groupings were chosen and why                                                         |                    |
| Statistical methods          | 12     | (a) Describe all statistical methods, including those used to control for confounding                                                                                                | 6                  |
|                              |        | (b) Describe any methods used to examine subgroups and interactions                                                                                                                  |                    |
|                              |        | (c) Explain how missing data were addressed                                                                                                                                          |                    |
|                              |        | (d) If applicable, describe analytical methods taking account of sampling strategy                                                                                                   |                    |
|                              |        | (e) Describe any sensitivity analyses                                                                                                                                                |                    |
| <b>Results</b>               |        |                                                                                                                                                                                      |                    |

|                          |     |                                                                                                                                                                                                                                                                                                                                                                                                               |      |
|--------------------------|-----|---------------------------------------------------------------------------------------------------------------------------------------------------------------------------------------------------------------------------------------------------------------------------------------------------------------------------------------------------------------------------------------------------------------|------|
| Participants             | 13* | (a) Report numbers of individuals at each stage of study—eg numbers potentially eligible, examined for eligibility, confirmed eligible, included in the study, completing follow-up, and analysed<br>(b) Give reasons for non-participation at each stage<br>(c) Consider use of a flow diagram                                                                                                               |      |
| Descriptive data         | 14* | (a) Give characteristics of study participants (eg demographic, clinical, social) and information on exposures and potential confounders<br>(b) Indicate number of participants with missing data for each variable of interest                                                                                                                                                                               | 7    |
| Outcome data             | 15* | Report numbers of outcome events or summary measures                                                                                                                                                                                                                                                                                                                                                          | 7    |
| Main results             | 16  | (a) Give unadjusted estimates and, if applicable, confounder-adjusted estimates and their precision (eg, 95% confidence interval). Make clear which confounders were adjusted for and why they were included<br>(b) Report category boundaries when continuous variables were categorized<br>(c) If relevant, consider translating estimates of relative risk into absolute risk for a meaningful time period | 7    |
| Other analyses           | 17  | Report other analyses done—eg analyses of subgroups and interactions, and sensitivity analyses                                                                                                                                                                                                                                                                                                                |      |
| <b>Discussion</b>        |     |                                                                                                                                                                                                                                                                                                                                                                                                               |      |
| Key results              | 18  | Summarise key results with reference to study objectives                                                                                                                                                                                                                                                                                                                                                      | 8    |
| Limitations              | 19  | Discuss limitations of the study, taking into account sources of potential bias or imprecision. Discuss both direction and magnitude of any potential bias                                                                                                                                                                                                                                                    | 10   |
| Interpretation           | 20  | Give a cautious overall interpretation of results considering objectives, limitations, multiplicity of analyses, results from similar studies, and other relevant evidence                                                                                                                                                                                                                                    | 9-10 |
| Generalisability         | 21  | Discuss the generalisability (external validity) of the study results                                                                                                                                                                                                                                                                                                                                         | 10   |
| <b>Other information</b> |     |                                                                                                                                                                                                                                                                                                                                                                                                               |      |
| Funding                  | 22  | Give the source of funding and the role of the funders for the present study and, if applicable, for the original study on which the present article is based                                                                                                                                                                                                                                                 | 11   |

\*Give information separately for cases and controls in case-control studies and, if applicable, for exposed and unexposed groups in cohort and cross-sectional studies.

**Note:** An Explanation and Elaboration article discusses each checklist item and gives methodological background and published examples of transparent reporting. The STROBE checklist is best used in conjunction with this article (freely available on the Web sites of PLoS Medicine at <http://www.plosmedicine.org/>, Annals of Internal Medicine at <http://www.annals.org/>, and Epidemiology at <http://www.epidem.com/>). Information on the STROBE Initiative is available at [www.strobe-statement.org](http://www.strobe-statement.org).

# BMJ Open

## Identifying the latent classes of modifiable risk behaviours among diabetic and hypertensive individuals in North Eastern India: a population-based cross-sectional study

|                                 |                                                                                                                                                                                                                                                                                                           |
|---------------------------------|-----------------------------------------------------------------------------------------------------------------------------------------------------------------------------------------------------------------------------------------------------------------------------------------------------------|
| Journal:                        | <i>BMJ Open</i>                                                                                                                                                                                                                                                                                           |
| Manuscript ID                   | bmjopen-2021-053757.R1                                                                                                                                                                                                                                                                                    |
| Article Type:                   | Original research                                                                                                                                                                                                                                                                                         |
| Date Submitted by the Author:   | 01-Dec-2021                                                                                                                                                                                                                                                                                               |
| Complete List of Authors:       | Marbaniang, Strong P; International Institute for Population Sciences, Public Health and Mortality Studies<br>Lhungdim, Hemkothang; International Institute for Population Sciences, Public Health and Mortality Studies<br>Chungkham, Holendro; Indian Statistical Institute North-East Centre at Tezpur |
| <b>Primary Subject Heading</b>: | Public health                                                                                                                                                                                                                                                                                             |
| Secondary Subject Heading:      | Cardiovascular medicine, Epidemiology, Global health, Health policy, Smoking and tobacco                                                                                                                                                                                                                  |
| Keywords:                       | Hypertension < CARDIOLOGY, General diabetes < DIABETES & ENDOCRINOLOGY, Epidemiology < TROPICAL MEDICINE                                                                                                                                                                                                  |
|                                 |                                                                                                                                                                                                                                                                                                           |

SCHOLARONE™  
Manuscripts

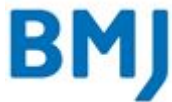

I, the Submitting Author has the right to grant and does grant on behalf of all authors of the Work (as defined in the below author licence), an exclusive licence and/or a non-exclusive licence for contributions from authors who are: i) UK Crown employees; ii) where BMJ has agreed a CC-BY licence shall apply, and/or iii) in accordance with the terms applicable for US Federal Government officers or employees acting as part of their official duties; on a worldwide, perpetual, irrevocable, royalty-free basis to BMJ Publishing Group Ltd ("BMJ") its licensees and where the relevant Journal is co-owned by BMJ to the co-owners of the Journal, to publish the Work in this journal and any other BMJ products and to exploit all rights, as set out in our [licence](#).

The Submitting Author accepts and understands that any supply made under these terms is made by BMJ to the Submitting Author unless you are acting as an employee on behalf of your employer or a postgraduate student of an affiliated institution which is paying any applicable article publishing charge ("APC") for Open Access articles. Where the Submitting Author wishes to make the Work available on an Open Access basis (and intends to pay the relevant APC), the terms of reuse of such Open Access shall be governed by a Creative Commons licence – details of these licences and which [Creative Commons](#) licence will apply to this Work are set out in our licence referred to above.

Other than as permitted in any relevant BMJ Author's Self Archiving Policies, I confirm this Work has not been accepted for publication elsewhere, is not being considered for publication elsewhere and does not duplicate material already published. I confirm all authors consent to publication of this Work and authorise the granting of this licence.

1  
2  
3 **Identifying the latent classes of modifiable risk behaviours among diabetic and hypertensive**  
4 **individuals in North Eastern India: a population-based cross-sectional study**  
5

6 **Strong P Marbaniang<sup>1,3\*</sup>, Hemkothang Lhungdim<sup>1</sup>, Holendro Singh Chungkham<sup>2,4</sup>**  
7  
8

9  
10 <sup>1</sup>Department of Public Health & Mortality Studies, International Institute for Population  
11 Sciences, Mumbai-400088, Maharashtra, India.

12  
13 <sup>2</sup>Indian Statistical Institute, North-East Centre, Tezpur-784501, Assam, India

14  
15 <sup>3</sup>Department of Statistics, Sankardev College, Shillong-793004, Meghalaya, India

16  
17 <sup>4</sup>Stress Research Institute, Stockholm University, Stockholm, Sweden  
18  
19

20  
21 \*Corresponding author

22 **Strong P Marbaniang**

23 **Email address-** [strongmarbaniang@yahoo.com](mailto:strongmarbaniang@yahoo.com)  
24  
25

26  
27 **MeSh Keywords:**

28  
29 Type 2 Diabetes ; Hypertension, Alcohol drinking, Smoking; Latent Class Analysis; North  
30 Eastern India.  
31

32 **Word Count:** 4464  
33  
34  
35  
36  
37  
38  
39  
40  
41  
42  
43  
44  
45  
46  
47  
48  
49  
50  
51  
52  
53  
54  
55  
56  
57  
58  
59  
60

## Abstract

**Objective:** To identify the latent classes of modifiable risk factors among the diabetic and hypertensive patients based on the observed indicators variables: smoking, alcohol, aerated drinks, overweight or obesity, diabetes, and hypertension. We hypothesized that the study population diagnosed with diabetes or hypertension is homogeneous with respect to the modifiable risk factors.

**Design:** A cross-sectional study using a stratified random sampling method, and a nationally representative large-scale survey.

**Setting and participants:** The data come from the fourth round of the Indian National Family Health Survey, 2015-16. Respondents age 15-49 years who were diagnosed with either diabetes or hypertension, or both were included. The total sample is 22,249, out of which 3,284 were males, and 18,965 females.

**Primary and secondary outcome measures:** The observed variables used as latent indicators are: smoking, alcohol, aerated drinks, overweight or obesity, diabetes, and hypertension. The concomitant variables include age, gender, education, marital status, and household wealth index. Latent class model was used to simultaneously identify the latent class and to determine the association between the concomitant variables and the latent classes.

**Results:** Three latent classes were identified and labelled as Class 1: “Diabetic with low-risk lifestyle” (21%), Class 2: “High-risk lifestyle” (8%), and Class 3: “Hypertensive with low-risk lifestyle” (71%). Class 1 is characterised by those with a high probability of having diabetes and low probability of smoking and drinking alcohol. Class 2 characterized by a high probability of smoking and drinking alcohol, and Class 3 by a high probability of having high blood pressure and low probability of smoking and drinking alcohol.

**Conclusions:** Males should control smoking and alcohol consumption, while females should control their body weight and blood pressure. Policy and intervention programmes in Northeastern India should focus on targeting multiple modifiable risk behaviours that are most likely to co-occur within an individual.

**Keywords:** Modifiable risk; Diabetes; Hypertension; Latent class analysis; Northeastern India.

### Strengths and limitations of the study

- The sample for the study is relatively large as it uses a nationally representative large-scale data.
- Respondents' status of diabetes and hypertension is as diagnosed during fieldwork (on the day of interview) using a standard biomarker instrument and measurement.
- Latent class analysis (LCA) is a person-centred technique and the appropriate method for explaining the clustering of health risk behaviours.
- The cross-sectional design of the study restricts us to measure the causal effect.
- Modifiable risk factors were collected based on dichotomous responses, which limits measuring the intensity of substance use.

## Introduction

Effective lifestyle modification plans and affordable approaches to control high blood sugar and high blood pressure level benefit the at-risk population [1,2]. The leading causes of mortality due to chronic diseases in adults, particularly older adults, are linked to unhealthy lifestyle and behaviours [3], such as tobacco consumption, physical inactivity, excess alcohol consumption, and poor diet. An alarmingly high prevalence of hypertension in North Eastern (NE) India has been reported in recent studies [4-6]. Sikkim has the highest prevalence of hypertension among all the Indian states, while other NE states such as Nagaland, Assam, Arunachal Pradesh, Mizoram, and Tripura have prevalence above 11.0 percent, which is well above the national average [5,6]. Further, according to the Global Burden of Disease (GBD) study, the percentage change of diabetes prevalence between 1990 and 2016 has increased by more than 20 percent across the states of Northeastern India [7]. This percentage change was highest in the states of Sikkim, Arunachal Pradesh, and Nagaland.

Modifiable health risk behaviours such as smoking, heavy consumption of alcohol, low physical activity, and unhealthy diet characterized by high intake of sugar and fats, low consumption of fruits and vegetables are the major causes of non-communicable diseases (NCDs) [8], and strongly linked with early mortality [9,10]. Usually, these risk behaviours exist simultaneously or cluster within individuals [11]. It is argued that lifestyle risk factors within individuals are not random, but more likely to cluster with other unhealthy behaviours [12,13]. Further, when two risk behaviours cluster together with each other more than the other factors, it may suggest that they could be influenced by a common source [14]. Moreover, modifiable risk behaviours for chronic diseases such as excessive use of alcohol, cigarette smoking, obesity and unhealthy diets are unlikely to occur in an entirely uniform manner in a population. That is, it is uncertain whether people can be accurately classify into two groups, as those adapting to a healthy versus those unhealthy lifestyle. For example, certain individuals who engage in more vigorous physical activities tend to consume alcohol more frequently than their inactive counterparts [15]. Also, cigarette smoking is associated with lower rate of obesity among certain individuals [16]. In a study among the US adults, Leventhal et al. (2014) used modifiable risk factors like usage of alcohol, drug, nicotine, current obesity status, and weekly physical activity and found that the adult population clusters into five sub-groups based on the pattern of these modifiable risk factors [14]. Another study in India by Shaikh and Khan (2021),



1  
2  
3 found that hypertension is more likely to cluster with other modifiable risk behaviours such as  
4 smoking, alcohol, chewing tobacco, obesity, and unhealthy diets in both men and women [17].  
5 Atorkey and Owiredua (2021), in their study that identified the clustering of five multiple  
6 health risk behaviours, also found that low vegetable and fruit intake, and low physical activity  
7 cluster together within an individual, whereas smoking tobacco and alcohol consumption co-  
8 occur together forming another cluster [18]. The pattern of clustering of modifiable risk  
9 behaviours could also differ by region and community level, as evident from previous studies  
10 [17,19]. The clustering of two or more modifiable risk behaviours is of great concern because  
11 it can intensify the risk of developing chronic diseases and cardiovascular mortality [20,21],  
12 and most intervention measures are specific to a single risk factors. For example, in Asia 43.5  
13 percent of Chinese adults and 37 percent of Korean adults had at least two cardiovascular risk  
14 factors [11,22]. Moreover, in India, 35.6 percent of adult men and 10 percent adult women  
15 have at least three lifestyle risk factors [17]. It is also found that a combination of smoking and  
16 heavy drinking emerged as the riskiest behaviour for all causes of death [23].  
17  
18  
19  
20  
21  
22  
23  
24  
25  
26  
27

28 The majority of studies reported a higher prevalence of smoking, excess alcohol  
29 consumption, physical inactivity, and poor diet among people with diabetes or hypertension  
30 than those without diabetes or hypertension [24,25]. Notably, previous studies have examined  
31 diabetic or hypertensive patients as a single homogeneous group without considering the  
32 possible heterogeneity existing within the population [26]. Most of the existing studies on  
33 health risk behaviours have emphasized only changing a single unhealthy behaviour [25,27].  
34 However, interventions that simultaneously target these unhealthy behaviours are necessary  
35 from the policy perspective [11].  
36  
37  
38  
39  
40  
41  
42

43 Existing studies in India on clustering of NCDs risk factors have used intraclass  
44 correlation and scoring methods [17,19,28]. However, studies have suggested that LCA is the  
45 most appropriate method for explaining the clustering of health risk behaviours [29,30]. LCA  
46 is a probabilistic model approach designed for identifying clusters based on dichotomous  
47 variables. This study is also an attempt to explore the clustering of NCD risk factors using the  
48 LCA approach in Northeastern India. The aims is to identify the latent classes of modifiable  
49 risk factors among diabetic and hypertensive patients based on the observed indicator variables  
50 such as smoking, alcohol, aerated drinks, overweight or obesity, diabetes, and hypertension.  
51 We applied LCA, also to investigate heterogeneity in the population of an individual with  
52 diabetes and hypertension based on the responses of observed risk factors. More specifically,  
53 the objective is to describe how individuals in Northeast India diagnosed with diabetes or  
54  
55  
56  
57  
58  
59  
60

1  
2  
3 hypertension are clustered according to the pattern of observed risk factors and identify the  
4 difference between these groups based on socio-demographic characteristics. Information on  
5 clustering of health risk behaviours become vital as it guides in designing the disease control  
6 programs. Intervention approach that aimed at targeting multiple modifiable risk behaviours in  
7 a single program are gaining importance because they are potentially most cost-effective,  
8 efficient and may have a great public health impact than the single modifiable risk approaches.  
9 Therefore, we hypothesize that the study population diagnosed with diabetes or hypertension  
10 is homogeneous with respect to the modifiable risk factors.  
11  
12  
13  
14  
15  
16

## 17 **Methods**

### 18 ***Study location***

19  
20 The study focuses on the Northeastern region (NER) of India comprising eight states, namely  
21 Assam, Arunachal Pradesh, Manipur, Meghalaya, Mizoram, Nagaland, Sikkim, and Tripura  
22 (Figure 1). Most parts of the region has a hilly terrain and inhabited mainly by myriad tribes  
23 belonging to different cultures and ethnic communities [31]. The region has over 45 million  
24 population, which is 3.8 percent of India's population, with a density of 159 persons per km<sup>2</sup>  
25 [32].  
26  
27  
28  
29  
30  
31  
32

33  
34 .....Figure 1: *Map showing the location of the Study area. Source: Authors.....*  
35  
36 **(here)**

### 37 ***Design and Setting***

38  
39 The NFHS-4 (2015-16), a nationally representative large scale survey, is a cross-sectional study that  
40 adopted a stratified two-stage random sampling design for both urban and rural areas, including a  
41 systematic mapping and listing of households in the selected primary sampling units (PSUs). The  
42 analysis is based on the publicly available data, in which the identity of selected respondents,  
43 households, and geocodes of PSUs are concealed [33]. In the first stage, the PSUs were selected  
44 based on probability proportional to population size (PPS). Rural PSUs are the villages, while  
45 census enumeration blocks (CEBs) formed the PSUs in urban areas. In the second stage,  
46 systematic random sampling was done in each PSUs to select households for the sample. At  
47 the household level, information were sought from the heads, eligible women age 15 – 49 years,  
48 and men age 15 – 54 years, alongwith their biomarkers and blood samples on a specially  
49 designed Dried Blood Spots (DBS). A detailed description of the survey design can be found  
50 elsewhere [33].  
51  
52  
53  
54  
55  
56  
57  
58  
59  
60

1  
2  
3 The data used in this study is the fourth round of the Indian National Family Health Survey  
4 (NFHS-4) conducted during 2015-16. The data was downloaded from the DHS website [34].  
5  
6 The NFHS series of surveys has been initiated by the Ministry of Health and Family Welfare,  
7  
8 Government of India, and coordinated by the International Institute for Population Sciences,  
9  
10 Mumbai.

### 11 12 13 **Sample**

14  
15 The study includes only individuals age 15-49 years who were diagnosed with either  
16  
17 diabetes or hypertension, or both. The total sample size is 22,249, of which 3,284 were males,  
18  
19 and 18,965 were females for the Northeastern region of India.

### 20 21 22 **Patient and Public Involvement**

23  
24 No patient involved

### 25 26 27 **Measures**

28  
29 **Diabetes:** Fingertick blood is collected, and blood glucose level is determined using the  
30  
31 FreeStyle Optium H Glucometer. A respondent is considered diagnosed with diabetes if the  
32  
33 random blood sugar level is  $>140\text{mg/dl}$  [33].

34  
35  
36 **Hypertension:** Blood pressure (BP) level was measured using an OMRON Blood Pressure  
37  
38 measuring device. Three separate blood pressure readings were taken with an interval of 5  
39  
40 minutes between readings. A respondent is considered hypertensive if the systolic blood  
41  
42 pressure is  $\geq 140$  mmHg, or diastolic blood pressure  $\geq 90$  mmHg, or if the respondent was  
43  
44 taking antihypertensive medication to lower blood pressure at the time of the survey [33].

45  
46 **Overweight or obesity:** In this study, we categorized continuous body mass index (BMI)  
47  
48 according to the WHO guidelines for the Asian population. A respondent is classified as  
49  
50 overweight or obese if BMI is  $\geq 23$   $\text{kg/m}^2$  [35].

### 51 52 53 **Outcome Variables of Interest**

54  
55 **Observed Indicator variables:** The observed variables used as latent indicators are cigarette  
56  
57 smoking (No=1, Yes=2), Alcohol consumption (No=1, Yes=2), Takes aerated drink (No=1,  
58  
59 Yes=2), Overweight or obesity (No=1, Yes=2), Diabetes (No=1, Yes=2), and Hypertension  
60  
(No=1, Yes=2).

### *Predictors or Concomitant variables*

**Concomitant variables for class determination:** The concomitant variables include age, gender, education, marital status, and household wealth index.

### *Statistical Analysis*

Latent Class Analysis (LCA), based on structural equation modelling, is a person-centred analytical approach that allows the identification of homogeneous sub-groups in a heterogeneous population. LCA is similar to cluster analysis because individuals are classifying into homogenous unobserved (latent) groups based on the response pattern to a set of observed variables. However, in cluster analysis, objects are classified based on distance measures, whereas in LCA classification are based on probabilistic and finite mixture modelling approach [36,37]. A latent class model splits the population into mutually exclusive and exhaustive groups that are homogeneous within the groups but differ among them. Several studies have adopted the LCA approach to identify risk factors clustering within the heterogeneous population. In a study by Dey et al (2016), based on seven observed risk factors, LCA was used to classify individuals into two latent class “susceptible to adverse health outcomes groups” and “not susceptible to adverse health outcomes groups” [38]. Another study in China applied LCA to ten observed complications and comorbidities of T2 diabetic patients and categorized the individuals into four latent classes, namely "complications and comorbidity groups", "high risk of complications group", “high risk of comorbidities and Cardio Vascular Disease groups”, and “diabetes without complications and comorbidities group” [39]. A study in West Azerbaijan province among the hypertensive patients aged 50 years and above used four indicators such as dietary patterns, physical activity, tobacco use, and high blood pressure control to categorized the hypertensive patients into three latent classes [40].

Latent Class Analysis is an innovative statistical method used to identify the latent classes of homogeneous individuals in a heterogeneous population [39]. The latent class was performed using the six indicators variables mentioned above. LCA uses observed dichotomous indicators to identify the unobserved latent class in a heterogeneous population. To determine the optimal number of latent classes, we examined one to four models. The optimal number of latent classes was chosen based on the model having the smallest Akaike Information Criterion (AIC), Consistent Akaike Information Criterion (cAIC), Bayesian-Schwarz Information Criterion (BIC), adjusted Bayesian-Schwarz Information Criterion

(aBIC), and Entropy [41,42]. A combination of parsimony and interpretability model selection criteria was used to carefully select the number of latent classes so that individuals are allocated to their most likely class. The outputs of the latent class analysis includes the number of latent classes, the latent class probability (i.e., the probability that an individual selected at random belonged to each latent class), and the conditional probability (i.e., the probability that an individual would give a particular response to a specific item of an observed indicator variable given that an individual belongs to a specific latent class).

To determine the association between the concomitant variables (i.e., age, gender, education, marital status, and household wealth index) and the latent class, we apply the one-step technique approach. In this approach, the concomitant variables are included in the latent class regression model, and their coefficient is estimated simultaneously as part of the latent class model [43]. This approach has been demonstrated to provide the best and unbiased coefficient estimates of the concomitant variables as compared to other methods [44]. Statistical analysis was conducted in R statistical software, and LCA was analyze using the poLCA package (Polytomous Variable Latent Class Analysis) [43].

Figure 2: *Conceptual framework of the study. Source: Authors*

## Results

### *Descriptive statistics*

A total of 22,249 individuals with chronic diseases, i.e., diagnosed with diabetes or hypertension, were included in the analysis (Table 1). Individuals in the age group 45-49 and 15-19 constitute the largest (21.3%) and the lowest (5.0%) respectively in the total sample. Over half (51.2%) of the sample have completed secondary education, 24.6 percent were illiterate, and 79.6 percent were currently married. Further, among the chronic disease patients, the prevalence of smoking, consumption of alcohol, and aerated drinks were 4.2, 14.8, and 68.6 percent respectively. Also, 81.1 percent of the participants reported suffering from hypertension, and 27.7 percent from diabetes. The sample distribution also indicates that chronic condition is much higher among females (86.1%) than males (13.9%), among older ages (age 35+), and among poorer households.

**Table 1: Percent distribution of adults of age 15-49 years with chronic condition (diabetic and hypertensive patients) by selected background characteristics, Northeastern India, NFHS-4, 2015-16.**

| <b>Background Characteristics</b> | <b>% (n=22,249)</b> |
|-----------------------------------|---------------------|
| <b>Age</b>                        |                     |
| 15-19                             | 5.04                |
| 20-24                             | 8.38                |
| 25-29                             | 12.17               |
| 30-34                             | 14.96               |
| 35-39                             | 19.19               |
| 40-44                             | 18.95               |
| 45-49                             | 21.31               |
| <b>Sex</b>                        |                     |
| Male                              | 13.88               |
| Female                            | 86.12               |
| <b>Education</b>                  |                     |
| Illiterate                        | 24.6                |
| Primary                           | 16.3                |
| Secondary                         | 51.17               |
| Higher Secondary                  | 7.93                |
| <b>Marital Status</b>             |                     |
| Never married                     | 13.57               |
| Married                           | 79.56               |
| Widowed/Divorced/Separated        | 6.87                |
| <b>Wealth Index</b>               |                     |
| Poorest                           | 16.72               |
| Poorer                            | 34.55               |
| Middle                            | 22.44               |
| Richer                            | 17.5                |
| Richest                           | 8.79                |
| <b>Observed Indicators</b>        |                     |
| Smoking                           | 4.17                |
| Drink alcohol                     | 14.8                |
| Take aerated drinks               | 68.57               |
| Overweight or Obesity             | 43.26               |
| Diabetes                          | 27.7                |
| Hypertension                      | 81.13               |

### ***Model fit and selection of Latent class***

The model fit/selection statistics to derive appropriate models are shown in Table 2. We fit the LCA models with classes ranging from 1 to 4. For each LCA model, the model fit indicators BIC, AIC, cAIC, and Entropy were calculated. According to the model fit indicators, a three-Class model has been selected as the best fit model as it has the lowest BIC and cAIC values. Smaller values on each indicator suggest a better model, or a model with few explanatory variables or parameters, and inform the decision of the best model to be retained [45]. Another diagnostic indicator is entropy [46], which indicates how accurately the model defines the

classes. In general, an entropy value close to 1.0 is considered as ideal [47], and above 0.8 is also acceptable. An entropy value of 1.0 would indicate that every individual has been perfectly classified within the classes based on the responses of the observed indicators. The three latent classes were labelled as “Diabetic with low-risk lifestyle”, “High-risk lifestyle”, and “Hypertensive with low-risk lifestyle”. Figure 3 portrays the graphical representation of item response probability for the indicator’s variables across the latent classes.

**Table 2: Model fit statistics for the latent class models (n=22,249)**

| No of classes | log-likelihood | Residual df | BIC      | aBIC     | cAIC     | likelihood-ratio | Entropy |
|---------------|----------------|-------------|----------|----------|----------|------------------|---------|
| 1             | -69173.11      | 57          | 138406.3 | 138387.2 | 138412.3 | 17350.762        | -       |
| 2             | -61315.38      | 34          | 122921   | 122828.9 | 122950   | 1859.196         | 1.0     |
| 3             | -58920.21      | 11          | 118361   | 118195.7 | 118413   | 1168.644         | 0.91    |
| 4             | -59970.1       | -12         | 120691   | 120452.6 | 120766   | 2396.112         | 0.94    |

Latent class probability and the conditional probability of a “Yes” response for each indicator variables were summarized in Table 3. The last row in Table 3 indicates the probability of class membership in each latent class. About 21 percent of the participants were expected to belong to the Class 1 “diabetic with low-risk lifestyle”, 8 percent to Class 2 “high-risk lifestyle”, and 71 percent to Class 3 “hypertensive with low-risk lifestyle”. Members in Class 1 were likely to report having high blood sugar level (diabetic) and unlikely to smoke cigarette or drinking alcohol. Members in Class 2 are more likely to smoke cigarette and drink alcohol, and members in Class 3 are likely to report having high blood pressure and unlikely to smoke cigarette or drink alcohol.

Figure 3: **Item response conditional probability across the latent classes.** *Source: Authors*

**Table 3: The conditional probability of the response items and the latent class probability for study sample in Northeastern India, NFHS-4, 2015-16**

| Indicator Variables             | Diabetic with low-risk lifestyle (Class 1) | High-risk lifestyle (Class 2) | Hypertensive with low-risk lifestyle (Class 3) |
|---------------------------------|--------------------------------------------|-------------------------------|------------------------------------------------|
| Smoking                         | 0.04                                       | 0.55                          | 0.02                                           |
| Drink alcohol                   | 0.12                                       | 0.81                          | 0.14                                           |
| Take aerated drinks             | 0.76                                       | 0.78                          | 0.77                                           |
| Overweight or Obesity           | 0.44                                       | 0.52                          | 0.51                                           |
| Diabetic                        | 1.00                                       | 0.25                          | 0.11                                           |
| Hypertensive                    | 0.00                                       | 0.88                          | 1.00                                           |
| <b>Latent class probability</b> | <b>0.21</b>                                | <b>0.08</b>                   | <b>0.71</b>                                    |

Table 4 presents the distribution of socio-economic and demographic characteristics of the individuals by the three latent classes. Age, gender, education, marital status, and household wealth index were statistically found significantly associated with the three latent classes at 1 percent level of significant. The hypertensive with low-risk lifestyle class has the highest proportion of respondents aged 45-49 years, whereas both diabetic with low-risk lifestyle class and high-risk lifestyle class has the highest proportion of respondents aged 35-39 years (19.4% and 19.5% respectively). Both the diabetic with low-risk lifestyle class (10.6% males vs. 89.4% females) and the hypertensive with low-risk lifestyle class (6.2% males vs. 93.8% females) has the highest proportion of females; males constituted almost 100 percent of the high-risk lifestyle class (99.2% males vs. 0.8% females). Lower proportion of the respondents have completed higher secondary education in case of both diabetic with low-risk lifestyle class (10.5%) and hypertensive with low-risk lifestyle class (8.5%). Marital status shows a similar pattern in all the three classes; higher proportion of married respondents and lower proportion of widowed/divorced/separated respondents (<10%). The Wealth index shows that respondents belonging to the middle quintile constituted the largest proportion in the diabetic with low-risk lifestyle class (27.2%), and high-risk lifestyle class (26.6%). However, respondents belonging to the poorer wealth quintile have the highest proportion of hypertensive with low-risk lifestyle class (29.4%).

**Table 4: Percent distribution of diabetic and hypertensive patients age 15-49 years according to three latent classes by background characteristics, Northeastern India, NFHS-4, 2015-16**

| Background Characteristics | “Diabetic with low-risk lifestyle” class (n=4727, 21%) | “High-risk lifestyle” class (n=1828, 8%) | “Hypertensive with low-risk lifestyle” class (n=15,694, 71%) | P-value <sup>a</sup> |
|----------------------------|--------------------------------------------------------|------------------------------------------|--------------------------------------------------------------|----------------------|
| <b>Age</b>                 |                                                        |                                          |                                                              | <0.01                |
| 15-19                      | 8.08                                                   | 3.06                                     | 4.96                                                         |                      |
| 20-24                      | 8.99                                                   | 8.37                                     | 7.6                                                          |                      |
| 25-29                      | 12.88                                                  | 13.51                                    | 11.93                                                        |                      |
| 30-34                      | 15.30                                                  | 18.00                                    | 15.29                                                        |                      |
| 35-39                      | 19.40                                                  | 19.53                                    | 19.46                                                        |                      |
| 40-44                      | 17.73                                                  | 19.09                                    | 19.04                                                        |                      |
| 45-49                      | 17.62                                                  | 18.44                                    | 21.72                                                        |                      |
| <b>Gender</b>              |                                                        |                                          |                                                              | <0.01                |
| Male                       | 10.62                                                  | 99.18                                    | 6.17                                                         |                      |
| Female                     | 89.38                                                  | 0.82                                     | 93.83                                                        |                      |
| <b>Education</b>           |                                                        |                                          |                                                              | <0.01                |
| Illiterate                 | 17.96                                                  | 11.65                                    | 25.17                                                        |                      |
| Primary                    | 16.50                                                  | 15.10                                    | 15.85                                                        |                      |
| Secondary                  | 55.05                                                  | 58.70                                    | 50.50                                                        |                      |
| Higher Secondary           | 10.49                                                  | 14.55                                    | 8.47                                                         |                      |
| <b>Marital Status</b>      |                                                        |                                          |                                                              | <0.01                |
| Never married              | 19.93                                                  | 21.55                                    | 14.30                                                        |                      |



|                                |              |              |              |
|--------------------------------|--------------|--------------|--------------|
| Married                        | 72.75        | 75.22        | 78.41        |
| Widowed/Divorced/Se<br>parated | 7.32         | 3.23         | 7.30         |
| <b>Wealth Index</b>            |              |              | <0.01        |
| Poorest                        | 10.94        | 12.14        | 12.94        |
| Poorer                         | 26.06        | 24.84        | 29.43        |
| Middle                         | 27.23        | 26.64        | 26.30        |
| Richer                         | 22.49        | 23.34        | 21.25        |
| Richest                        | 13.29        | 12.04        | 10.07        |
| <b>Total</b>                   | <b>100.0</b> | <b>100.0</b> | <b>100.0</b> |

Note: <sup>a</sup>Based on chi-squared tests of association.

### ***Covariates predicting latent class membership***

Table 5 summarized the odds ratios (OR) results from the latent regression model. Compared with respondents in the 15-19 years age group, those in the 20-29 age group were 4.1 times (OR=4.10; p<0.01) more likely to belong to class 2 (high-risk lifestyle) than to class 1 (diabetic with low-risk lifestyle). Similarly, compared with respondents in the 15-19 years age group, those in the 45-49 age group were 1.7 times (OR=1.73; p<0.01) more likely to belong to class 3 (hypertensive with low-risk lifestyle) than to class 1 (diabetic with low-risk lifestyle). Also, we observed that the odds of being in class 3 increases with the age of the respondents. With respect to males, females were less likely (OR=0.002; p<0.01) to belong to class 2 but more likely (OR=1.46; p<0.01) to belong to class 3. Higher odds of being in class 2-3 than to class 1 was observed among the married respondents (OR=1.54). Similarly, widowed/divorced/separated were more likely to be in class 2 (OR=3.35; p<0.01), but less likely to be in class 3 (OR=0.98; p<0.01). Moreover, compared to the illiterate respondents, those with higher secondary education were less likely to belong to class 3 than to class 1 (OR=0.79; p<0.01), and being in the richest wealth quintile lower is the odds of being in class 3 than in class 1 (OR=0.69; p<0.01).

**Table 5: The odds for various latent classes of lifestyle behaviours and their associated covariates among individuals age 15-49 years, Northeastern India, NFHS-4, 2015-16**

| Background Characteristics | Class 2 vs Class 1 |      | Class 3 vs Class 1 |      |
|----------------------------|--------------------|------|--------------------|------|
|                            | Odds Ratio         | S. E | Odds Ratio         | S. E |
| <b>Age</b>                 |                    |      |                    |      |
| 15-19                      | Ref                |      | Ref                |      |
| 20-24                      | 4.10 ***           | 0.25 | 1.27 **            | 0.09 |
| 25-29                      | 5.10 ***           | 0.25 | 1.34 ***           | 0.09 |
| 30-34                      | 5.70 ***           | 0.26 | 1.42 ***           | 0.09 |
| 35-39                      | 3.53 ***           | 0.26 | 1.42 ***           | 0.09 |
| 40-44                      | 3.82 ***           | 0.27 | 1.51 ***           | 0.09 |
| 45-49                      | 3.46 ***           | 0.27 | 1.73 ***           | 0.09 |

|                            |           |      |          |      |
|----------------------------|-----------|------|----------|------|
| <b>Gender</b>              |           |      |          |      |
| Male                       | Ref       |      | Ref      |      |
| Female                     | 0.002 *** | 0.34 | 1.46 *** | 0.07 |
| <b>Education</b>           |           |      |          |      |
| Illiterate                 | Ref       |      | Ref      |      |
| Primary                    | 1.03      | 0.19 | 0.73 *** | 0.06 |
| Secondary                  | 1.08      | 0.17 | 0.79 *** | 0.05 |
| Higher Secondary           | 0.70      | 0.21 | 0.79 *** | 0.08 |
| <b>Marital Status</b>      |           |      |          |      |
| Never married              | Ref       |      | Ref      |      |
| Married                    | 1.54 **   | 0.15 | 1.16 **  | 0.06 |
| Widowed/Divorced/Separated | 3.35 ***  | 0.35 | 0.98     | 0.08 |
| <b>Wealth Index</b>        |           |      |          |      |
| Poorest                    | Ref       |      | Ref      |      |
| Poorer                     | 0.90      | 0.18 | 1.00     | 0.06 |
| Middle                     | 1.02      | 0.18 | 0.87 **  | 0.07 |
| Richer                     | 1.14      | 0.19 | 0.86 *   | 0.07 |
| Richest                    | 1.13      | 0.22 | 0.69 *** | 0.08 |

Ref: Reference group; \*\*\**p*-value<0.01; \*\**p*-value<0.05; \**p*-value<0.1; S.E: Standard Error; Reference group: Class 1

## Discussion

This study is the first attempt in Northeastern India, a region characterized by a seemingly homogenous racial group but inhabited by ethno-lingually diverse sub-populations, that applied latent class analysis to provide evidence about the pattern of modifiable risk factors among people suffering from diabetes or hypertension. Based on the observed modifiable health risk behaviours, the LCA suggests presence of three classes of respondents with diabetes or hypertension: “diabetic with low-risk lifestyle”, “high-risk lifestyle”, and “hypertensive with low-risk lifestyle”. The findings portray that the 22,249 odd diabetic or hypertensive persons in the region can be categorized into three groups or classes, with homogeneity in their characteristics within the group but heterogeneous between the groups. One of the three latent classes has a 100 percent likelihood of having one of the risk factors combined with a low and moderate probability of having the other five risk factors. Each of the classes exhibit a unique risk factor configurations, and socio-economic and demographic profiles from one another. Thus, chronic diseases prevention programmes that specially target and reach out to the at-risk sub-populations will be beneficial and effective, as illustrated in this analysis (Table 3 and 5).

More than 70 percent of the respondents belong to the class “hypertensive with low-risk lifestyle” have their blood pressure level higher than normal and less likely to smoke and use alcohol. Evidence from a large body of existing literature supports that cigarette smoking leads to an immediate increase in blood pressure level and heart rate [48]. The effect of cigarette

1  
2  
3 smoking on blood pressure and heart rate is largely due to the nicotine content in the cigarettes  
4 [48]. However, studies also found a significant elevation in blood pressure and an increase in  
5 the prevalence of hypertension following smoking cessation [49,50], which could possibly be  
6 due to post-cessation weight gain [48,49]. Green et al. (1986) had concluded that smoking  
7 cessation in itself is not likely to result in a lowering blood pressure but on the contrary it may  
8 result even in higher blood pressure [51]. Moreover, about 8 percent of the respondents  
9 belonging to the “high-risk lifestyle” class mostly drink alcohol and smoke cigarettes. This co-  
10 occurrence of alcohol use and cigarette smoking have been well documented in the existing  
11 studies [52,53], and evidence suggest that a common genetic trait play a role in the co-  
12 occurrence of smoking and alcohol use [54,55]. Epidemiological studies have also shown that  
13 individuals who are dependent on nicotine are more than four time more likely to be dependent  
14 on alcohol. Similarly, individuals who are dependent on alcohol are also more than three times  
15 more likely to be dependent on nicotine with reference to the general population [56]. Stress is  
16 another factor that influences use of tobacco and alcohol. For example, people who drink  
17 alcohol are most likely to smoke in an attempt to overcome stress [57]. Literature also suggest  
18 cross tolerance effect between alcohol and tobacco. It is found that the stimulating effect of  
19 nicotine in tobacco is restrained by the sedating effect of alcohol, which entices smokers to  
20 drink more alcohol [58]. Alcohol’s sedating effect reduces the physiological effect of nicotine,  
21 thus increasing the consumption of tobacco.  
22  
23  
24  
25  
26  
27  
28  
29  
30  
31  
32  
33  
34  
35  
36

37 In all the three identified classes, a vast majority of diabetic or hypertensive persons  
38 appear to have a habit of consuming aerated drinks and an uncontrolled body weight. Studies  
39 suggest that sugar-sweetened beverages intake is the major contributor to weight gain and can  
40 increase the risk of T2 diabetes and hypertension [59,60]. Cross-sectional studies acknowledge  
41 the positive association between overweight and obesity with the consumption of aerated  
42 drinks or sugar-sweetened beverages. For example, studies infer that women who consumed  
43 sweetened beverages more than once a week were more likely to be overweight than those who  
44 consumed sweetened beverages less than once a week [61]. Other studies found that women  
45 who consumed sugar-sweetened beverages regularly were heavier by 0.2 kg than the non-  
46 consumers [62]. The intake of sodas sweetened with high-fructose corn syrup is associated  
47 with hypertension among adolescents population [63]. Also, a spurt in the prevalence of  
48 hypertension have been observed among individuals who consumed more than average amount  
49 of fructose [64]. Evidence from a cross-sectional study in Northeast India supports the positive  
50 correlation between overweight or obesity with diabetes and hypertension [26]. The plausible  
51  
52  
53  
54  
55  
56  
57  
58  
59  
60

1  
2  
3 explanation is that both sugar sweetened beverages and artificial sweetened beverages are  
4 associated with the development of metabolic derangements that in turn might lead to elevated  
5 blood pressure [65]. High intake of sugar-sweetened beverages contributes to a higher total  
6 energy consumption, which increases energy intake without an increase in energy expenditure  
7 certainly results in weight gain. There is no dearth of scientific evidence which support the  
8 notion that decreasing aerated drinks consumption reduces the prevalence of overweight and  
9 obesity.  
10  
11  
12  
13  
14  
15

16 As observed in a previous study [66], this study also found that those aged 20 years and  
17 above are more likely to be in the 'high-risk cluster' than those below 20 years. Studies have  
18 elucidated that the adolescence or teenage stage is just the initial stage when an individual starts  
19 using or exposed to alcohol or tobacco (smoking) products. However, as this behaviour  
20 becomes a habit later on, it subsequently accentuates the intensity of substance (ab)use among  
21 older adults [67,68]. Also, it is well documented that initiation of smoking and drinking alcohol  
22 at an early age is associated with the number of cigarettes smoked and the quantity of alcohol  
23 consumed per day in adult age. According to Investigator (1991) and Dawson et al. (2008),  
24 individuals who began to smoke or drink before the age of 20 years were most likely to  
25 consumed a large volume of alcohol and smoked more cigarettes per day as compared to those  
26 who started after the age of 20 or above [69,70]. Further, compared to young adults, older  
27 adults were more likely to report high blood pressure and less likely to smoke or drink alcohol.  
28 One reason could be the existing condition of high blood pressure; an older adult was most  
29 likely to have taken a precaution by lowering or quitting smoking and alcohol consumption to  
30 prevent further deterioration of health. Evidence from a recent study among older adults  
31 demonstrated that the main reason for smoking cessation attempt was the motivation towards  
32 better health [71]. Hypertensive smokers were encouraged to quit smoking because of the risk  
33 of developing a severe form of hypertension such as malignant and renovascular hypertension  
34 [72]. Gender factors are also found to be significantly associated with class 2 "high-risk  
35 lifestyle" and 3 "hypertensive with low-risk lifestyle". Consistent with the previous studies, in  
36 this study also, female respondents were less likely to be in the high-risk cluster than males  
37 [73]. One primary reason stated is that smoking and drinking alcohol by women is not socially  
38 and culturally accepted by many [74], and women are more concerned about their health and  
39 tend to avoid unhealthy lifestyle behaviours [75]. In our study, individuals from a wealthier  
40 households with higher education were less likely to belong to a cluster of hypertensive with  
41 low substance use. An individual with higher education and better income can afford to pay for  
42  
43  
44  
45  
46  
47  
48  
49  
50  
51  
52  
53  
54  
55  
56  
57  
58  
59  
60

1  
2  
3 a healthier lifestyle, including regular physical exercise, accessibility to advanced and quality  
4 healthcare services, as such efforts may reduce the risk of hypertension [76,77]. Being  
5 widowed/divorced/separated tend to increase the likelihood of falling into the high-risk cluster.  
6  
7 Substance use by marital status indicated that widowed or divorced individuals are most likely  
8  
9 to consumed alcohol, cigarette, and marijuana as compared to singles [78,79].  
10  
11

12 A search of similar studies indicates that no study in India or Northeast India has  
13 examined the clustering of health risk factors using the latent class approach. However, our  
14 study has some limitations. Firstly, the cross-sectional design of the study restricts us to  
15 measure the causal effect. Second, due to the dichotomous response on alcohol consumption,  
16 we cannot measure the quantity of alcohol an individual consumed.  
17  
18  
19  
20  
21

## 22 **Conclusion**

23  
24 In Northeastern India, as this study illustrates, there are three classes of modifiable risk factors  
25 closely related to the risk of chronic diseases (diabetes and hypertension). In addition, the study  
26 also identified factors that uniquely distinguished the identified classes. The intake of aerated  
27 drinks and obesity are the common modifiable risk factors in all three classes. As an initiative  
28 to healthy lifestyle behaviours, the findings suggest that males should control smoking and  
29 alcohol consumption, while females should control body weight and blood pressure. Further,  
30 we found that marital status and gender could be the catalyst to prevent high-risk smoking and  
31 alcohol drinking in Northeastern India. Also, the study observes smoking and alcohol use are  
32 the two modifiable risk behaviours, which tends to co-occur within an individual. Therefore, it  
33 is recommended that policy and intervention programmes in Northeastern India that promote  
34 healthy lifestyles should focus on targeting multiple modifiable risk behaviours that are most  
35 likely to co-occur within an individual. On the other hand, awareness about adapting to healthy  
36 diets and weight control along with physical exercises should be promoted with rigour in the  
37 region.  
38  
39  
40  
41  
42  
43  
44  
45  
46  
47

48  
49 **Acknowledgement:** The authors are thankful to the two reviewers for their insightful  
50 comments and valuable suggestions, which hugely improved the analysis and the overall  
51 quality of the paper.  
52  
53

54  
55 **Contributors:** Conceived and designed the research paper: SPM, HL. Analysed the data: SPM,  
56 HSC. Contributed agents/materials/analysis tools: SPM, HL, HSC. Drafting manuscript: SPM,  
57 HSC. Refined the manuscript: SPM, HL, HSC.  
58  
59  
60

**Funding:** This research received no specific grant from any funding agency in the public, commercial or not-for-profit sectors.

**Competing Interest:** None declared.

**Patient consent for publication:** Not applicable

**Ethics approval:** This study is based on the secondary data which is publicly available from the Demographic Health Survey website and the respondents are de-identified, hence ethical approval is not required for this study.

**Data availability statement:** Data stored and maintained by the Demographic Health Survey office, and available to public at [https://dhsprogram.com/data/dataset/India\\_Standard-DHS\\_2015.cfm?flag=1](https://dhsprogram.com/data/dataset/India_Standard-DHS_2015.cfm?flag=1) upon request.

**Word count:** 4464

## References

- 1 Chobanian A V, Bakris GL, Black HR, *et al.* The Seventh Report of the Joint National Committee on Prevention, Detection, Evaluation, and Treatment of High Blood Pressure: the JNC 7 report. *JAMA* 2003;**289**:2560–72. doi:10.1001/jama.289.19.2560
- 2 International Diabetes Federation. Advocacy guide to the IDF Diabetes Atlas Ninth edition 2019. Brussels, Belgium:International Diabetes Federation: 2019. <http://www.diabetesatlas.org/> (accessed 14 Nov 2019).
- 3 Ford ES, Zhao G, Tsai J, *et al.* Low-Risk Lifestyle Behaviors and All-Cause Mortality: Findings From the National Health and Nutrition Examination Survey III Mortality Study. *Am J Public Health* 2011;**101**:1922–9. doi:10.2105/AJPH.2011.300167
- 4 Geldsetzer P, Manne-Goehler J, Theilmann M, *et al.* Geographic and sociodemographic variation of cardiovascular disease risk in India: A cross-sectional study of 797,540 adults. *PLOS Med* 2018;**15**:e1002581. doi:10.1371/journal.pmed.1002581
- 5 Ghosh S, Kumar M. Prevalence and associated risk factors of hypertension among persons aged 15–49 in India: a cross-sectional study. *BMJ Open* 2019;**9**:e029714. doi:10.1136/bmjopen-2019-029714
- 6 Gupta R, Gaur K, S. Ram CV. Emerging trends in hypertension epidemiology in India. *J Hum Hypertens* 2019;**33**:575–87. doi:10.1038/s41371-018-0117-3
- 7 Tandon N, Anjana RM, Mohan V, *et al.* The increasing burden of diabetes and variations

- 1  
2  
3 among the states of India: the Global Burden of Disease Study 1990-2016. *Lancet Glob*  
4 *Heal* 2018;6:e1352–62. doi:10.1016/S2214-109X(18)30387-5  
5  
6  
7  
8 WHO. (2014). Global status report on noncommunicable diseases 2014. In World  
9 Health Organization.  
10  
11  
12 9 Kvaavik, E. (2010). Influence of Individual and Combined Health Behaviors on Total  
13 and Cause-Specific Mortality in Men and Women. *Archives of Internal Medicine*,  
14 170(8), 711. <https://doi.org/10.1001/archinternmed.2010.76>  
15  
16  
17  
18 10 Loef, M., & Walach, H. (2012). The combined effects of healthy lifestyle behaviors on  
19 all cause mortality: A systematic review and meta-analysis. *Preventive Medicine*, 55(3),  
20 163–170. <https://doi.org/10.1016/j.ypmed.2012.06.017>  
21  
22  
23  
24 11 Ha S, Choi HR, Lee YH. Clustering of four major lifestyle risk factors among Korean  
25 adults with metabolic syndrome. *PLoS One* 2017;12:e0174567.  
26 doi:10.1371/journal.pone.0174567  
27  
28  
29  
30 12 Poortinga W. The prevalence and clustering of four major lifestyle risk factors in an  
31 English adult population. *Prev Med (Baltim)* 2007;44:124–8.  
32 doi:10.1016/j.ypmed.2006.10.006  
33  
34  
35  
36 13 Schuit AJ, van Loon AJM, Tijhuis M, *et al*. Clustering of Lifestyle Risk Factors in a  
37 General Adult Population. *Prev Med (Baltim)* 2002;35:219–24.  
38 doi:10.1006/pmed.2002.1064  
39  
40  
41  
42 14 Leventhal AM, Huh J, Dunton GF. Clustering of modifiable biobehavioral risk factors  
43 for chronic disease in US adults: a latent class analysis. *Perspect Public Health*  
44 2014;134:331–8. doi:10.1177/1757913913495780  
45  
46  
47  
48 15 Lisha NE, Martens M, Leventhal AM. Age and gender as moderators of the  
49 relationship between physical activity and alcohol use. *Addict Behav* 2011;36:933–6.  
50 doi:10.1016/j.addbeh.2011.04.003.  
51  
52  
53  
54 16 Akbartabartoori M, Lean MEJ, Hankey CR. Relationships between cigarette smoking,  
55 body size and body shape. *Int J Obes* 2005;29:236–43. doi:10.1038/sj.ijo.0802827  
56  
57  
58  
59 17 Shaikh R, Khan J. Clustering of lifestyle risk factors among adult population in India:  
60 A cross-sectional analysis from 2005 to 2016. *PLoS One* 2021;16:e0244559.  
doi:10.1371/journal.pone.0244559

- 1  
2  
3 18 Atorkey P, Owiredua C. Clustering of multiple health risk behaviours and association  
4 with socio-demographic characteristics and psychological distress among adolescents  
5 in Ghana: A latent class analysis. *SSM - Popul Heal* 2021;13:100707.  
6  
7 doi:10.1016/j.ssmph.2020.100707  
8  
9
- 10 19 Bishops AC, De Neve J-W, Awasthi A, *et al.* A cross-sectional study of  
11 cardiovascular disease risk clustering at different socio-geographic levels in India. *Nat*  
12 *Commun* 2020;11:5891. doi:10.1038/s41467-020-19647-3  
13  
14
- 15 20 Laxer RE, Brownson RC, Dubin JA, *et al.* Clustering of risk-related modifiable  
16 behaviours and their association with overweight and obesity among a large sample of  
17 youth in the COMPASS study. *BMC Public Health* 2017;17:102. Doi:10.1186/s12889-  
18 017-4034-0  
19  
20  
21
- 22 21 Lee DH, Nam JY, Kwon S, *et al.* Lifestyle risk score and mortality in Korean adults: a  
23 population-based cohort study. *Sci Rep* 2020;10:10260. doi:10.1038/s41598-020-  
24 66742-y  
25  
26  
27  
28
- 29 22 Gao B, Zhang L, Wang H. Clustering of Major Cardiovascular Risk Factors and the  
30 Association with Unhealthy Lifestyles in the Chinese Adult Population. *PLoS One*  
31 2013;8:e66780. doi:10.1371/journal.pone.0066780  
32  
33  
34
- 35 23 Hart CL, Davey Smith G, Gruer L, *et al.* The combined effect of smoking tobacco and  
36 drinking alcohol on cause-specific mortality: A 30 year cohort study. *BMC Public*  
37 *Health* 2010;10. doi:10.1186/1471-2458-10-789  
38  
39  
40
- 41 24 Sobngwi E, Mbanya J-CN, Unwin N, *et al.* Physical activity and its relationship with  
42 obesity, hypertension and diabetes in urban and rural Cameroon. *Int J Obes*  
43 2002;26:1009–16. doi:10.1038/sj.ijo.0802008  
44  
45  
46
- 47 25 Bani T Aeri DS. Risk Factors Associated with the Increasing Cardiovascular Diseases  
48 Prevalence in India: A Review. *J Nutr Food Sci* 2014;05:1–6. doi:10.4172/2155-  
49 9600.1000331  
50  
51  
52
- 53 26 Marbaniang SP, Lhungdim H, Yadav B, *et al.* Overweight/obesity risks and prevalence  
54 of diabetes and hypertension in North Eastern India: An analysis using seemingly  
55 unrelated probit model. *Clin Epidemiol Glob Heal* 2021;11:100764.  
56  
57 doi:10.1016/j.cegh.2021.100764  
58  
59  
60



- 1  
2  
3 27 Umamahesh K, Vigneswari A, Surya Thejaswi G, *et al.* Incidence of cardiovascular  
4 diseases and associated risk factors among subjects with type 2 diabetes – An 11-year  
5 follow up study. *Indian Heart J* 2014;**66**:5–10. doi:10.1016/j.ihj.2013.12.009  
6  
7  
8  
9 28 Sarveswaran G, Kulothungan V, Mathur P. Clustering of noncommunicable disease  
10 risk factors among adults (18–69 years) in rural population, South-India. *Diabetes*  
11 *Metab Syndr Clin Res Rev* 2020;**14**:1005–14. doi:10.1016/j.dsx.2020.05.042  
12  
13  
14  
15 29 Schreiber JB. Latent Class Analysis: An example for reporting results. *Res Soc Adm*  
16 *Pharm* 2017;**13**:1196–201. doi:10.1016/j.sapharm.2016.11.011  
17  
18  
19 30 Weller BE, Bowen NK, Faubert SJ. Latent Class Analysis: A Guide to Best Practice. *J*  
20 *Black Psychol* 2020;**46**:287–311. doi:10.1177/0095798420930932  
21  
22  
23 31 Marbaniang SP. Women Care and Practices in the Management of Childhood Diarrhea  
24 in Northeast India. *Child Care Pract* 2020;:1–13.  
25 doi:10.1080/13575279.2020.1812534  
26  
27  
28  
29 32 Dikshit KR, Dikshit JK. Population of the North-Eastern States of India. In: *North-*  
30 *East India: Land, People and Economy. Advances in Asian Human-Environmental*  
31 *Research*. Dordrecht: : Springer 2014. 421–56. doi:10.1007/978-94-007-7055-3\_12  
32  
33  
34  
35 33 International Institute for Population Sciences (IIPS) and ICF. National Family Health  
36 Survey (NFHS-4), 2015-16: India. Mumbai:IIPS: 2017. [http://rchiips.org/nfhs/NFHS-](http://rchiips.org/nfhs/NFHS-4Reports/India.pdf)  
37 [4Reports/India.pdf](http://rchiips.org/nfhs/NFHS-4Reports/India.pdf)  
38  
39  
40  
41 34 DHS. The DHS Program-India: Standard DHS, 2015-16 Dataset,. Demogr. Heal. Surv.  
42 2017.[https://dhsprogram.com/data/dataset/India\\_Standard-DHS\\_2015.cfm?flag=1](https://dhsprogram.com/data/dataset/India_Standard-DHS_2015.cfm?flag=1)  
43  
44  
45 35 Barba C, Cavalli-Sforza T, Cutter J, *et al.* Appropriate body-mass index for Asian  
46 populations and its implications for policy and intervention strategies. *Lancet*  
47 2004;**363**:157–63. doi:10.1016/S0140-6736(03)15268-3  
48  
49  
50  
51 36 Islam MM, Valderas JM, Yen L, *et al.* Multimorbidity and Comorbidity of Chronic  
52 Diseases among the Senior Australians: Prevalence and Patterns. *PLoS One*  
53 2014;**9**:e83783. doi:10.1371/journal.pone.0083783  
54  
55  
56 37 Brusco MJ, Shireman E, Steinley D. A comparison of latent class, K-means, and K-  
57 median methods for clustering dichotomous data. *Psychol Methods* 2017;**22**:563–80.  
58 doi:10.1037/met0000095  
59  
60

- 1  
2  
3 38 Dey A, Chakraborty A, Majumdar K, *et al.* Application of latent class analysis to  
4 estimate susceptibility to adverse health outcomes based on several risk factors. *Int J*  
5 *Community Med Public Heal* 2016;**3**:3423–9. doi:10.18203/2394-  
6 6040.ijcmph20164268  
7  
8  
9  
10  
11 39 Gao F, Chen J, Liu X, *et al.* Latent class analysis suggests four classes of persons with  
12 type 2 diabetes mellitus based on complications and comorbidities in Tianjin, China: a  
13 cross-sectional analysis. *Endocr J* 2017;**64**:1007–16. doi:10.1507/endocrj.EJ17-0199  
14  
15  
16 40 Ghanbari J, Mohammadpoorasl A, Jahangiry L, *et al.* Subgroups of lifestyle patterns  
17 among hypertension patients: a latent-class analysis. *BMC Med Res Methodol*  
18 2018;**18**:127. doi:10.1186/s12874-018-0607-6  
19  
20  
21  
22 41 Sugiura N. Further analysts of the data by akaike' s information criterion and the finite  
23 corrections. *Commun Stat - Theory Methods* 1978;**7**:13–26.  
24 doi:10.1080/03610927808827599  
25  
26  
27  
28 42 Akaike H. A New Look at the Statistical Model Identification. 1974. 215–22.  
29 doi:10.1007/978-1-4612-1694-0\_16  
30  
31  
32 43 Linzer DA, Lewis JB. polLCA : An R Package for Polytomous Variable Latent Class  
33 Analysis. *J Stat Softw* 2011;**42**. doi:10.18637/jss.v042.i10  
34  
35  
36 44 Bolck A, Croon M, Hagenaars J. Estimating latent structure models with categorical  
37 variables: One-step versus three-step estimators. *Polit Anal* 2004;**12**:3–27.  
38 doi:10.1093/pan/mp01  
39  
40  
41  
42 45 Rosato NS, Baer JC. Latent class analysis: A method for capturing heterogeneity. *Soc*  
43 *Work Res* 2012;**36**:61–9. doi:10.1093/swr/svs006  
44  
45  
46 46 Wang M-C, Deng Q, Bi X, *et al.* Performance of the entropy as an index of  
47 classification accuracy in latent profile analysis: A Monte Carlo simulation study. *Acta*  
48 *Psychol Sin* 2017;**49**:1473. doi:10.3724/SP.J.1041.2017.01473  
49  
50  
51  
52 47 Celeux G, Soromenho G. An entropy criterion for assessing the number of clusters in a  
53 mixture model. *J Classif* 1996;**13**:195–212. doi:10.1007/BF01246098  
54  
55  
56 48 Omvik P. How smoking affects blood pressure. *Blood Press* 1996;**5**:71–7.  
57 doi:10.3109/08037059609062111  
58  
59  
60

- 1  
2  
3 49 Jenner DA, Puddey IB, Beilin LJ, *et al.* Lifestyle- and occupation-related changes in  
4 blood pressure over a six-year period in a cohort of working men. *J Hypertens Suppl*  
5 *Off J Int Soc Hypertens* 1988;**6**:S605-7. doi:10.1097/00004872-198812040-00189  
6  
7  
8  
9 50 Gerace TA, Hollis J, Ockene JK, *et al.* Smoking cessation and change in diastolic  
10 blood pressure, body weight, and plasma lipids. MRFIT Research Group. *Prev Med*  
11 *(Baltim)* 1991;**20**:602–20. doi:10.1016/0091-7435(91)90058-c  
12  
13  
14  
15 51 Green MS, Jucha E, Luz Y. Blood pressure in smokers and nonsmokers:  
16 Epidemiologic findings. *Am Heart J* 1986;**111**:932–40. doi:10.1016/0002-  
17 8703(86)90645-9  
18  
19  
20  
21 52 Ho RKS, Fok PWY, Chan HCH. Pattern and determinants of alcohol and tobacco co-  
22 use and its relationship with smoking cessation in Hong Kong. *Tob Prev & Cessat*  
23 *2021*;**7**:1–9. doi:10.18332/tpc/132288  
24  
25  
26  
27 53 Jiang N, Lee YO, Ling PM. Association between tobacco and alcohol use among  
28 young adult bar patrons: a cross-sectional study in three cities. *BMC Public Health*  
29 *2014*;**14**:500. doi:10.1186/1471-2458-14-500  
30  
31  
32  
33 54 Slutske WS. Common Genetic Vulnerability for Pathological Gambling and Alcohol  
34 Dependence in Men. *Arch Gen Psychiatry* 2000;**57**:666–73.  
35 doi:10.1001/archpsyc.57.7.666  
36  
37  
38  
39 55 Bierut LJ, Schuckit MA, Hesselbrock V, *et al.* Co-occurring risk factors for alcohol  
40 dependence and habitual smoking. *Alcohol Res Health* 2000;**24**:233–  
41 41. <http://www.ncbi.nlm.nih.gov/pubmed/15986718>  
42  
43  
44  
45 56 Grant BF, Hasin DS, Chou SP, *et al.* Nicotine Dependence and Psychiatric Disorders  
46 in the United States. *Arch Gen Psychiatry* 2004;**61**:1107.  
47 doi:10.1001/archpsyc.61.11.1107  
48  
49  
50  
51 57 Lyon RJ, Tong JE, Leigh G, *et al.* The influence of alcohol and tobacco on the  
52 components of choice reaction time. *J Stud Alcohol* 1975;**36**:587–96.  
53 doi:10.15288/jsa.1975.36.587  
54  
55  
56  
57 58 de Fiebre CM, Collins AC. A comparison of the development of tolerance to ethanol  
58 and cross-tolerance to nicotine after chronic ethanol treatment in long- and short-sleep  
59 mice. *J Pharmacol Exp Ther* 1993;**266**:1398–406.  
60

- 1  
2  
3 59 Malik VS, Popkin BM, Bray GA, *et al.* Sugar-sweetened beverages, obesity, type 2  
4 diabetes mellitus, and cardiovascular disease risk. *Circulation* 2010;**121**:1356–64.  
5 doi:10.1161/CIRCULATIONAHA.109.876185  
6  
7  
8  
9 60 Qin P, Li Q, Zhao Y, *et al.* Sugar and artificially sweetened beverages and risk of  
10 obesity, type 2 diabetes mellitus, hypertension, and all-cause mortality: a dose–  
11 response meta-analysis of prospective cohort studies. *Eur J Epidemiol* 2020;**35**:655–  
12 71. doi:10.1007/s10654-020-00655-y  
13  
14  
15  
16 61 Liebman M, Pelican S, Moore SA, *et al.* Dietary intake, eating behavior, and physical  
17 activity-related determinants of high body mass index in rural communities in  
18 Wyoming, Montana, and Idaho. *Int J Obes* 2003;**27**:684–92.  
19 doi:10.1038/sj.ijo.0802277  
20  
21  
22  
23  
24 62 French S, Jeffery R, Forster J, *et al.* Predictors of weight change over two years among  
25 a population of working adults: the Healthy Worker Project. *Int J Obes Relat Metab*  
26 *Disord* 1994;**18** 3:145–54.  
27  
28  
29  
30 63 Nguyen S, Choi HK, Lustig RH, *et al.* Sugar-Sweetened Beverages, Serum Uric Acid,  
31 and Blood Pressure in Adolescents. *J Pediatr* 2009;**154**:807–13.  
32 doi:10.1016/j.jpeds.2009.01.015  
33  
34  
35  
36 64 Jalal DI, Smits G, Johnson RJ, *et al.* Increased Fructose Associates with Elevated  
37 Blood Pressure. *J Am Soc Nephrol* 2010;**21**:1543–9. doi:10.1681/ASN.2009111111  
38  
39  
40 65 Cohen L, Curhan G, Forman J. Association of sweetened beverage intake with incident  
41 hypertension. *J Gen Intern Med* 2012;**27**:1127–34. Doi:10.1007/s11606-012-2069-6  
42  
43  
44 66 Saikia N, Debbarma B. The socioeconomic correlates of substance use among male  
45 adults in Northeast India. *Clin Epidemiol Glob Heal* 2020;**8**:149–57.  
46 doi:10.1016/j.cegh.2019.06.004  
47  
48  
49  
50 67 IOM (Institute of Medicine). Patterns of Tobacco Use by Adolescents and Young  
51 Adults. In: Richard J. Bonnie, Kathleen Stratton LYK, ed. *Public Health Implications*  
52 *of Raising the Minimum Age of Legal Access to Tobacco Products*. Washington, D.C.:  
53 : The National Academies Press 2015.  
54 :  
55 :  
56 :  
57 : [https://www.ncbi.nlm.nih.gov/books/NBK310412/pdf/Bookshelf\\_NBK310412.pdf](https://www.ncbi.nlm.nih.gov/books/NBK310412/pdf/Bookshelf_NBK310412.pdf)  
58  
59 68 Maggs JL, Schulenberg JE. Initiation and Course of Alcohol Consumption among  
60

- 1  
2  
3 Adolescents and Young Adults. In: *Recent Developments in Alcoholism*. New York: :  
4 Kluwer Academic Publishers-Plenum Publishers 2005. 29–47. doi:10.1007/0-306-  
5 48626-1\_2  
6  
7  
8  
9 69 Investigators S. Effect of the Age at Which Smoking Begins on Frequency of Smoking  
10 in Adulthood. *N Engl J Med* 1991;**325**:968–9. doi:10.1056/NEJM199109263251318  
11  
12  
13 70 Dawson DA, Goldstein RB, Patricia Chou S, *et al*. Age at First Drink and the First  
14 Incidence of Adult-Onset DSM-IV Alcohol Use Disorders. *Alcohol Clin Exp Res*  
15 2008;**32**:2149–60. doi:10.1111/j.1530-0277.2008.00806.x  
16  
17  
18  
19 71 Tanihara S, Momose Y. Reasons for smoking cessation attempts among Japanese male  
20 smokers vary by nicotine dependence level: a cross-sectional study after the 2010  
21 tobacco tax increase. *BMJ Open* 2015;**5**:e006658–e006658. doi:10.1136/bmjopen-  
22 2014-006658  
23  
24  
25  
26 72 Freitas SRS, Alvim RO. Smoking and blood pressure phenotypes: New perspective for  
27 an old problem. *Am J Hypertens* 2017;**30**:554–5. doi:10.1093/ajh/hpx039  
28  
29  
30  
31 73 Saikia B, Marbaniang SP, Kumar P, *et al*. Changing pattern of tobacco consumption  
32 and quitting behavior in Northeast India. *J Subst Use* 2021;:1–12.  
33 doi:10.1080/14659891.2021.1875068  
34  
35  
36  
37 74 Wilsnack RW, Wilsnack SC, Kristjanson AF, *et al*. Gender and alcohol consumption:  
38 patterns from the multinational GENACIS project. *Addiction* 2009;**104**:1487–500.  
39 doi:10.1111/j.1360-0443.2009.02696.x  
40  
41  
42  
43 75 Nolen-Hoeksema S. Gender differences in risk factors and consequences for alcohol  
44 use and problems. *Clin Psychol Rev* 2004;**24**:981–1010. doi:10.1016/j.cpr.2004.08.003  
45  
46  
47 76 Rasiah R, Yusoff K, Mohammadreza A, *et al*. Cardiovascular disease risk factors and  
48 socioeconomic variables in a nation undergoing epidemiologic transition. *BMC Public*  
49 *Health* 2013;**13**:886. doi:10.1186/1471-2458-13-886  
50  
51  
52  
53 77 Winkleby MA, Jatulis DE, Frank E, *et al*. Socioeconomic status and health: how  
54 education, income, and occupation contribute to risk factors for cardiovascular disease.  
55 *Am J Public Health* 1992;**82**:816–20. doi:10.2105/AJPH.82.6.816  
56  
57  
58 78 Menasco M, Blair S. Gender Differences in Substance Use Across Marital Statuses. *Int*  
59 *J Criminol Sociol* 2016;**5**:1–13. doi:10.6000/1929-4409.2016.05.01  
60

- 1  
2  
3 79 Power C, Rodgers B, Hope S. Heavy alcohol consumption and marital status:  
4 disentangling the relationship in a national study of young adults. *Addiction*  
5 1999;**94**:1477–87. doi:10.1046/j.1360-0443.1999.941014774.x  
6  
7  
8  
9  
10  
11  
12  
13  
14  
15  
16  
17  
18  
19  
20  
21  
22  
23  
24  
25  
26  
27  
28  
29  
30  
31  
32  
33  
34  
35  
36  
37  
38  
39  
40  
41  
42  
43  
44  
45  
46  
47  
48  
49  
50  
51  
52  
53  
54  
55  
56  
57  
58  
59  
60

For peer review only

1  
2  
3  
4  
5  
6  
7  
8  
9  
10  
11  
12  
13  
14  
15  
16  
17  
18  
19  
20  
21  
22  
23  
24  
25  
26  
27  
28  
29  
30  
31  
32  
33  
34  
35  
36  
37  
38  
39  
40  
41  
42  
43  
44  
45  
46  
47  
48  
49  
50  
51  
52  
53  
54  
55  
56  
57  
58  
59  
60

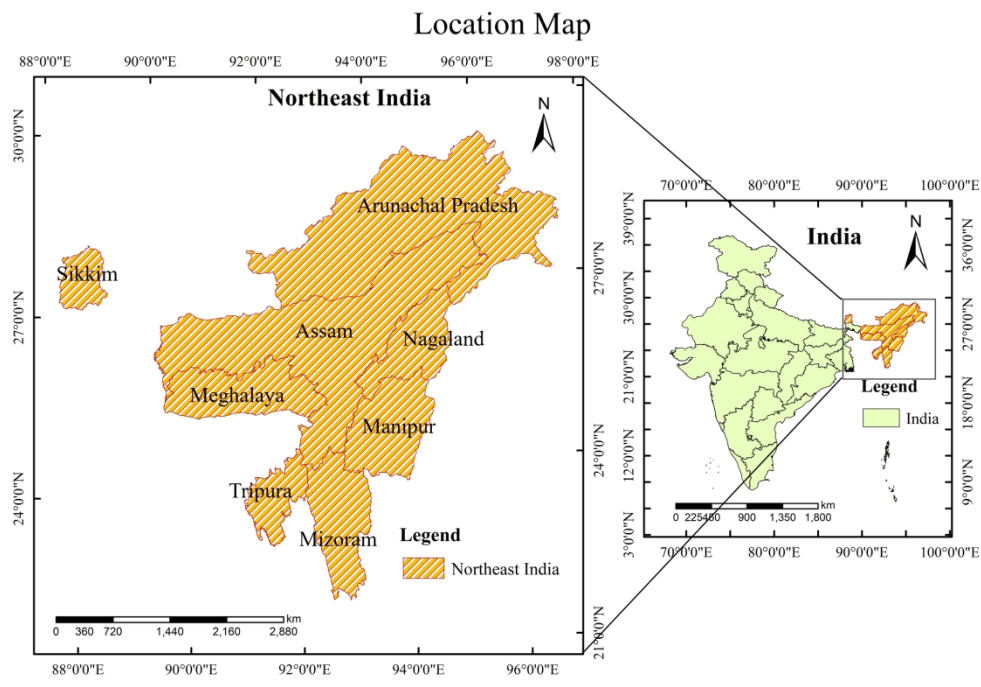

Map showing the location of the Study area. Source: Authors

595x412mm (96 x 96 DPI)

1  
2  
3  
4  
5  
6  
7  
8  
9  
10  
11  
12  
13  
14  
15  
16  
17  
18  
19  
20  
21  
22  
23  
24  
25  
26  
27  
28  
29  
30  
31  
32  
33  
34  
35  
36  
37  
38  
39  
40  
41  
42  
43  
44  
45  
46  
47  
48  
49  
50  
51  
52  
53  
54  
55  
56  
57  
58  
59  
60

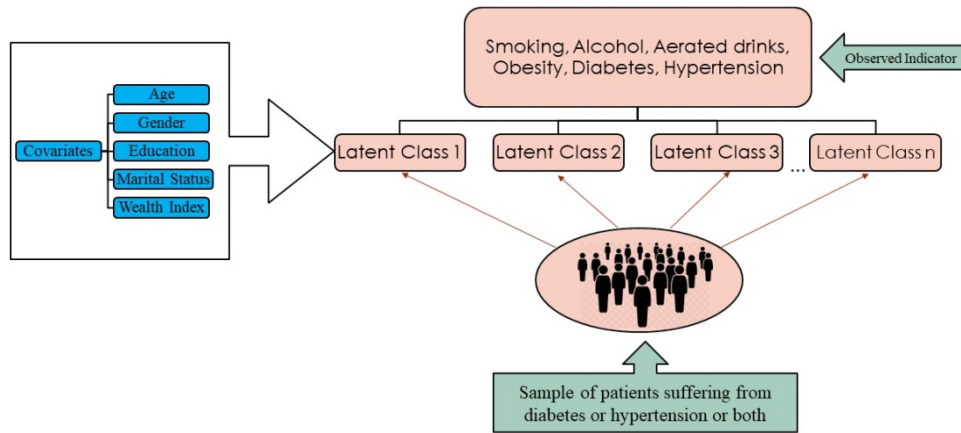

Conceptual framework of the study. Source: Authors

108x60mm (300 x 300 DPI)



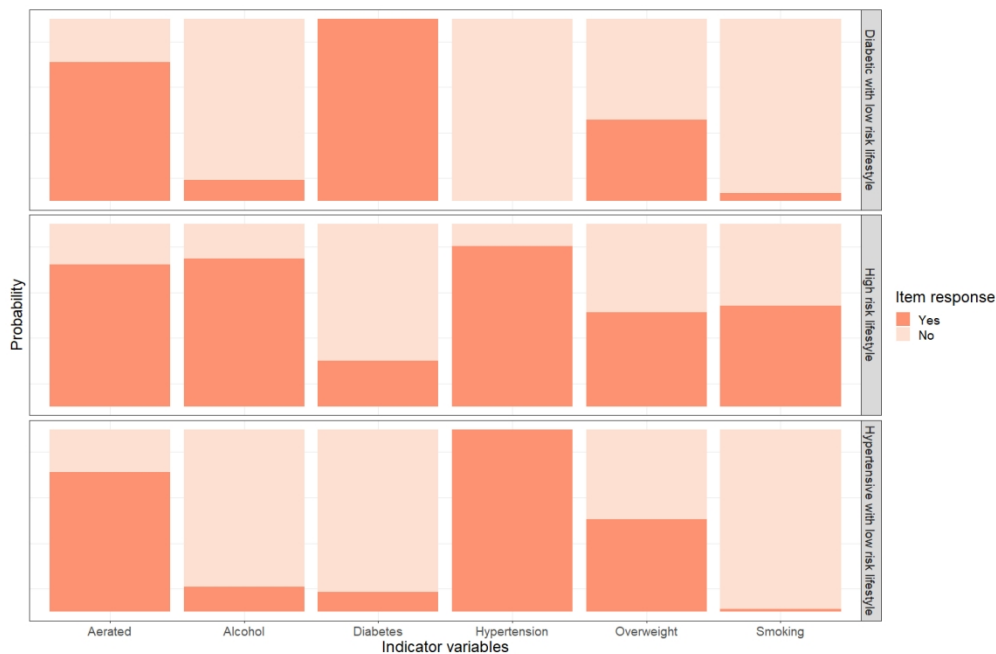

Item response conditional probability across the latent classes. Source: Authors

129x84mm (300 x 300 DPI)

**STROBE 2007 (v4) Statement—Checklist of items that should be included in reports of *cross-sectional studies***

| Section/Topic                | Item # | Recommendation                                                                                                                                                                       | Reported on page # |
|------------------------------|--------|--------------------------------------------------------------------------------------------------------------------------------------------------------------------------------------|--------------------|
| <b>Title and abstract</b>    | 1      | (a) Indicate the study's design with a commonly used term in the title or the abstract                                                                                               | 1                  |
|                              |        | (b) Provide in the abstract an informative and balanced summary of what was done and what was found                                                                                  | 1                  |
| <b>Introduction</b>          |        |                                                                                                                                                                                      |                    |
| Background/rationale         | 2      | Explain the scientific background and rationale for the investigation being reported                                                                                                 | 4                  |
| Objectives                   | 3      | State specific objectives, including any prespecified hypotheses                                                                                                                     | 4                  |
| <b>Methods</b>               |        |                                                                                                                                                                                      |                    |
| Study design                 | 4      | Present key elements of study design early in the paper                                                                                                                              | 5                  |
| Setting                      | 5      | Describe the setting, locations, and relevant dates, including periods of recruitment, exposure, follow-up, and data collection                                                      | 5                  |
| Participants                 | 6      | (a) Give the eligibility criteria, and the sources and methods of selection of participants                                                                                          | 5                  |
| Variables                    | 7      | Clearly define all outcomes, exposures, predictors, potential confounders, and effect modifiers. Give diagnostic criteria, if applicable                                             | 6                  |
| Data sources/<br>measurement | 8*     | For each variable of interest, give sources of data and details of methods of assessment (measurement). Describe comparability of assessment methods if there is more than one group | 6                  |
| Bias                         | 9      | Describe any efforts to address potential sources of bias                                                                                                                            |                    |
| Study size                   | 10     | Explain how the study size was arrived at                                                                                                                                            | 5                  |
| Quantitative variables       | 11     | Explain how quantitative variables were handled in the analyses. If applicable, describe which groupings were chosen and why                                                         |                    |
| Statistical methods          | 12     | (a) Describe all statistical methods, including those used to control for confounding                                                                                                | 6                  |
|                              |        | (b) Describe any methods used to examine subgroups and interactions                                                                                                                  |                    |
|                              |        | (c) Explain how missing data were addressed                                                                                                                                          |                    |
|                              |        | (d) If applicable, describe analytical methods taking account of sampling strategy                                                                                                   |                    |
|                              |        | (e) Describe any sensitivity analyses                                                                                                                                                |                    |
| <b>Results</b>               |        |                                                                                                                                                                                      |                    |

|                          |     |                                                                                                                                                                                                                                                                                                                                                                                                               |      |
|--------------------------|-----|---------------------------------------------------------------------------------------------------------------------------------------------------------------------------------------------------------------------------------------------------------------------------------------------------------------------------------------------------------------------------------------------------------------|------|
| Participants             | 13* | (a) Report numbers of individuals at each stage of study—eg numbers potentially eligible, examined for eligibility, confirmed eligible, included in the study, completing follow-up, and analysed<br>(b) Give reasons for non-participation at each stage<br>(c) Consider use of a flow diagram                                                                                                               |      |
| Descriptive data         | 14* | (a) Give characteristics of study participants (eg demographic, clinical, social) and information on exposures and potential confounders<br>(b) Indicate number of participants with missing data for each variable of interest                                                                                                                                                                               | 7    |
| Outcome data             | 15* | Report numbers of outcome events or summary measures                                                                                                                                                                                                                                                                                                                                                          | 7    |
| Main results             | 16  | (a) Give unadjusted estimates and, if applicable, confounder-adjusted estimates and their precision (eg, 95% confidence interval). Make clear which confounders were adjusted for and why they were included<br>(b) Report category boundaries when continuous variables were categorized<br>(c) If relevant, consider translating estimates of relative risk into absolute risk for a meaningful time period | 7    |
| Other analyses           | 17  | Report other analyses done—eg analyses of subgroups and interactions, and sensitivity analyses                                                                                                                                                                                                                                                                                                                |      |
| <b>Discussion</b>        |     |                                                                                                                                                                                                                                                                                                                                                                                                               |      |
| Key results              | 18  | Summarise key results with reference to study objectives                                                                                                                                                                                                                                                                                                                                                      | 8    |
| Limitations              | 19  | Discuss limitations of the study, taking into account sources of potential bias or imprecision. Discuss both direction and magnitude of any potential bias                                                                                                                                                                                                                                                    | 10   |
| Interpretation           | 20  | Give a cautious overall interpretation of results considering objectives, limitations, multiplicity of analyses, results from similar studies, and other relevant evidence                                                                                                                                                                                                                                    | 9-10 |
| Generalisability         | 21  | Discuss the generalisability (external validity) of the study results                                                                                                                                                                                                                                                                                                                                         | 10   |
| <b>Other information</b> |     |                                                                                                                                                                                                                                                                                                                                                                                                               |      |
| Funding                  | 22  | Give the source of funding and the role of the funders for the present study and, if applicable, for the original study on which the present article is based                                                                                                                                                                                                                                                 | 11   |

\*Give information separately for cases and controls in case-control studies and, if applicable, for exposed and unexposed groups in cohort and cross-sectional studies.

**Note:** An Explanation and Elaboration article discusses each checklist item and gives methodological background and published examples of transparent reporting. The STROBE checklist is best used in conjunction with this article (freely available on the Web sites of PLoS Medicine at <http://www.plosmedicine.org/>, Annals of Internal Medicine at <http://www.annals.org/>, and Epidemiology at <http://www.epidem.com/>). Information on the STROBE Initiative is available at [www.strobe-statement.org](http://www.strobe-statement.org).

# BMJ Open

## Identifying the latent classes of modifiable risk behaviours among diabetic and hypertensive individuals in North Eastern India: a population-based cross-sectional study

|                                 |                                                                                                                                                                                                                                                                                                           |
|---------------------------------|-----------------------------------------------------------------------------------------------------------------------------------------------------------------------------------------------------------------------------------------------------------------------------------------------------------|
| Journal:                        | <i>BMJ Open</i>                                                                                                                                                                                                                                                                                           |
| Manuscript ID                   | bmjopen-2021-053757.R2                                                                                                                                                                                                                                                                                    |
| Article Type:                   | Original research                                                                                                                                                                                                                                                                                         |
| Date Submitted by the Author:   | 03-Feb-2022                                                                                                                                                                                                                                                                                               |
| Complete List of Authors:       | Marbaniang, Strong P; International Institute for Population Sciences, Public Health and Mortality Studies<br>Lhungdim, Hemkothang; International Institute for Population Sciences, Public Health and Mortality Studies<br>Chungkham, Holendro; Indian Statistical Institute North-East Centre at Tezpur |
| <b>Primary Subject Heading</b>: | Public health                                                                                                                                                                                                                                                                                             |
| Secondary Subject Heading:      | Cardiovascular medicine, Epidemiology, Global health, Health policy, Smoking and tobacco                                                                                                                                                                                                                  |
| Keywords:                       | Hypertension < CARDIOLOGY, General diabetes < DIABETES & ENDOCRINOLOGY, Epidemiology < TROPICAL MEDICINE                                                                                                                                                                                                  |
|                                 |                                                                                                                                                                                                                                                                                                           |

SCHOLARONE™  
Manuscripts



I, the Submitting Author has the right to grant and does grant on behalf of all authors of the Work (as defined in the below author licence), an exclusive licence and/or a non-exclusive licence for contributions from authors who are: i) UK Crown employees; ii) where BMJ has agreed a CC-BY licence shall apply, and/or iii) in accordance with the terms applicable for US Federal Government officers or employees acting as part of their official duties; on a worldwide, perpetual, irrevocable, royalty-free basis to BMJ Publishing Group Ltd ("BMJ") its licensees and where the relevant Journal is co-owned by BMJ to the co-owners of the Journal, to publish the Work in this journal and any other BMJ products and to exploit all rights, as set out in our [licence](#).

The Submitting Author accepts and understands that any supply made under these terms is made by BMJ to the Submitting Author unless you are acting as an employee on behalf of your employer or a postgraduate student of an affiliated institution which is paying any applicable article publishing charge ("APC") for Open Access articles. Where the Submitting Author wishes to make the Work available on an Open Access basis (and intends to pay the relevant APC), the terms of reuse of such Open Access shall be governed by a Creative Commons licence – details of these licences and which [Creative Commons](#) licence will apply to this Work are set out in our licence referred to above.

Other than as permitted in any relevant BMJ Author's Self Archiving Policies, I confirm this Work has not been accepted for publication elsewhere, is not being considered for publication elsewhere and does not duplicate material already published. I confirm all authors consent to publication of this Work and authorise the granting of this licence.

1  
2  
3 **Identifying the latent classes of modifiable risk behaviours among diabetic and hypertensive**  
4 **individuals in North Eastern India: a population-based cross-sectional study**  
5

6 **Strong P Marbaniang<sup>1,3\*</sup>, Hemkothang Lhungdim<sup>1</sup>, Holendro Singh Chungkham<sup>2,4</sup>**  
7  
8

9  
10 <sup>1</sup>Department of Public Health & Mortality Studies, International Institute for Population  
11 Sciences, Mumbai-400088, Maharashtra, India.

12  
13 <sup>2</sup>Indian Statistical Institute, North-East Centre, Tezpur-784501, Assam, India

14  
15 <sup>3</sup>Department of Statistics, Sankardev College, Shillong-793004, Meghalaya, India

16  
17 <sup>4</sup>Stress Research Institute, Stockholm University, Stockholm, Sweden  
18  
19

20  
21 \*Corresponding author

22 **Strong P Marbaniang**

23 **Email address-** [strongmarbaniang@yahoo.com](mailto:strongmarbaniang@yahoo.com)  
24  
25

26  
27 **MeSh Keywords:**

28  
29 Type 2 Diabetes; Hypertension, Alcohol drinking, Smoking; Latent Class Analysis; North  
30 Eastern India.  
31

32 **Word Count:** 4464  
33  
34  
35  
36  
37  
38  
39  
40  
41  
42  
43  
44  
45  
46  
47  
48  
49  
50  
51  
52  
53  
54  
55  
56  
57  
58  
59  
60

## Abstract

**Objective:** To identify the latent classes of modifiable risk factors among the diabetic and hypertensive patients based on the observed indicators variables: smoking, alcohol, aerated drinks, overweight or obesity, diabetes, and hypertension. We hypothesized that the study population diagnosed with diabetes or hypertension is homogeneous with respect to the modifiable risk factors.

**Design:** A cross-sectional study using a stratified random sampling method, and a nationally representative large-scale survey.

**Setting and participants:** Data come from the fourth round of the Indian National Family Health Survey, 2015-16. Respondents aged 15-49 years who were diagnosed with either diabetes or hypertension or both were included. The total sample is 22,249, out of which 3,284 were males, and 18,965 were females.

**Primary and secondary outcome measures:** The observed variables used as latent indicators are: smoking, alcohol, aerated drinks, overweight or obesity, diabetes, and hypertension. The concomitant variables include age, gender, education, marital status, and household wealth index. Latent class model was used to simultaneously identify the latent class and to determine the association between the concomitant variables and the latent classes.

**Results:** Three latent classes were identified and labelled as Class 1: “Diabetic with low-risk lifestyle” (21%), Class 2: “High-risk lifestyle” (8%), and Class 3: “Hypertensive with low-risk lifestyle” (71%). Class 1 is characterised by those with a high probability of having diabetes and low probability of smoking and drinking alcohol. Class 2 characterized by a high probability of smoking and drinking alcohol, and Class 3 by a high probability of having high blood pressure and low probability of smoking and drinking alcohol.

**Conclusions:** Co-occurrence of smoking and alcohol consumption were prevalent in men, while excess body weight and high blood pressure were prevalent in women. Policy and programmes in Northeastern India should focus on targeting multiple modifiable risk behaviours that co-occur within an individual.

**Keywords:** Modifiable risk; Diabetes; Hypertension; Latent class analysis; Northeastern India.

### Strengths and limitations of the study

- The sample for the study is relatively large as it uses a nationally representative large-scale data.
- Respondents' status of diabetes and hypertension is as diagnosed during fieldwork (on the day of interview) using a standard biomarker instrument and measurement.
- Latent class analysis (LCA) is a person-centred technique and the appropriate method for explaining the clustering of health risk behaviours.
- The cross-sectional design of the study restricts us to measure the causal effect.
- Modifiable risk factors were collected based on dichotomous responses, which limits measuring the intensity of substance use.



## Introduction

Effective lifestyle modification plans and affordable approaches to control high blood sugar and high blood pressure level benefit the at-risk population [1,2]. The leading causes of mortality due to chronic diseases in adults, particularly older adults, are linked to unhealthy lifestyle and behaviours [3], such as tobacco consumption, physical inactivity, excess alcohol consumption, and poor diet. An alarmingly high prevalence of hypertension in North Eastern (NE) India has been reported in recent studies [4-6]. Sikkim has the highest prevalence of hypertension among all the Indian states, while other NE states such as Nagaland, Assam, Arunachal Pradesh, Mizoram, and Tripura have prevalence above 11.0 percent, which is well above the national average [5,6]. Further, according to the Global Burden of Disease (GBD) study, the percentage change of diabetes prevalence between 1990 and 2016 has increased by more than 20 percent across the states of Northeastern India [7]. This percentage change was highest in the states of Sikkim, Arunachal Pradesh, and Nagaland.

Modifiable health risk behaviours such as smoking, heavy consumption of alcohol, low physical activity, and unhealthy diet characterized by high intake of sugar and fats, low consumption of fruits and vegetables are the major causes of non-communicable diseases (NCDs) [8], and strongly linked with early mortality [9,10]. Usually, these risk behaviours exist simultaneously or cluster within individuals [11]. It is argued that lifestyle risk factors within individuals are not random, but more likely to cluster with other unhealthy behaviours [12,13]. Further, when two risk behaviours cluster together with each other more than the other factors, it may suggest that they could be influenced by a common source [14]. Moreover, modifiable risk behaviours for chronic diseases such as excessive use of alcohol, cigarette smoking, obesity and unhealthy diets are unlikely to occur in an entirely uniform manner in a population. That is, it is uncertain whether people can be accurately classify into two groups, as those adapting to a healthy versus those unhealthy lifestyle. For example, certain individuals who engage in more vigorous physical activities tend to consume alcohol more frequently than their inactive counterparts [15]. Also, cigarette smoking is associated with lower rate of obesity among certain individuals [16]. In a study among the US adults, Leventhal et al. (2014) used modifiable risk factors like usage of alcohol, drug, nicotine, current obesity status, and weekly physical activity and found that the adult population clusters into five sub-groups based on the pattern of these modifiable risk factors [14]. Another study in India by Shaikh and Khan (2021),

1  
2  
3 found that hypertension is more likely to cluster with other modifiable risk behaviours such as  
4 smoking, alcohol, chewing tobacco, obesity, and unhealthy diets in both men and women [17].  
5 Atorkey and Owiredua (2021), in their study that identified the clustering of five multiple  
6 health risk behaviours, also found that low vegetable and fruit intake, and low physical activity  
7 cluster together within an individual, whereas smoking tobacco and alcohol consumption co-  
8 occur together forming another cluster [18]. The pattern of clustering of modifiable risk  
9 behaviours could also differ by region and community level, as evident from previous studies  
10 [17,19]. The clustering of two or more modifiable risk behaviours is of great concern because  
11 it can intensify the risk of developing chronic diseases and cardiovascular mortality [20,21],  
12 and most intervention measures are specific to a single risk factors. For example, in Asia 43.5  
13 percent of Chinese adults and 37 percent of Korean adults had at least two cardiovascular risk  
14 factors [11,22]. Moreover, in India, 35.6 percent of adult men and 10 percent adult women  
15 have at least three lifestyle risk factors [17]. It is also found that a combination of smoking and  
16 heavy drinking emerged as the riskiest behaviour for all causes of death [23].  
17  
18  
19  
20  
21  
22  
23  
24  
25  
26  
27

28 The majority of studies reported a higher prevalence of smoking, excess alcohol  
29 consumption, physical inactivity, and poor diet among people with diabetes or hypertension  
30 than those without diabetes or hypertension [24,25]. Notably, previous studies have examined  
31 diabetic or hypertensive patients as a single homogeneous group without considering the  
32 possible heterogeneity existing within the population [26]. Most of the existing studies on  
33 health risk behaviours have emphasized only changing a single unhealthy behaviour [25,27].  
34 However, interventions that simultaneously target these unhealthy behaviours are necessary  
35 from the policy perspective [11].  
36  
37  
38  
39  
40  
41  
42

43 Existing studies in India on clustering of NCDs risk factors have used intraclass  
44 correlation and scoring methods [17,19,28]. However, studies have suggested that LCA is the  
45 most appropriate method for explaining the clustering of health risk behaviours [29,30]. LCA  
46 is a probabilistic model approach designed for identifying clusters based on dichotomous  
47 variables. This study is also an attempt to explore the clustering of NCD risk factors using the  
48 LCA approach in Northeastern India. The aims is to identify the latent classes of modifiable  
49 risk factors among diabetic and hypertensive patients based on the observed indicator variables  
50 such as smoking, alcohol, aerated drinks, overweight or obesity, diabetes, and hypertension.  
51 We applied LCA, also to investigate heterogeneity in the population of an individual with  
52 diabetes and hypertension based on the responses of observed risk factors. More specifically,  
53 the objective is to describe how individuals in Northeast India diagnosed with diabetes or  
54  
55  
56  
57  
58  
59  
60

1  
2  
3 hypertension are clustered according to the pattern of observed risk factors and identify the  
4 difference between these groups based on socio-demographic characteristics. Information on  
5 clustering of health risk behaviours become vital as it guides in designing the disease control  
6 programs. Intervention approach that aimed at targeting multiple modifiable risk behaviours in  
7 a single program are gaining importance because they are potentially most cost-effective,  
8 efficient and may have a great public health impact than the single modifiable risk approaches.  
9 Therefore, we hypothesize that the study population diagnosed with diabetes or hypertension  
10 is homogeneous with respect to the modifiable risk factors.  
11  
12  
13  
14  
15  
16

## 17 **Methods**

### 18 ***Study location***

19  
20 The study focuses on the Northeastern region (NER) of India comprising eight states, namely  
21 Assam, Arunachal Pradesh, Manipur, Meghalaya, Mizoram, Nagaland, Sikkim, and Tripura  
22 (Figure 1). Most parts of the region has a hilly terrain and inhabited mainly by myriad tribes  
23 belonging to different cultures and ethnic communities [31]. The region has over 45 million  
24 population, which is 3.8 percent of India's population, with a density of 159 persons per km<sup>2</sup>  
25 [32].  
26  
27  
28  
29  
30  
31  
32  
33

### 34 ***Design and Setting***

35 The NFHS-4 (2015-16), a nationally representative large-scale survey, is a cross-sectional study that  
36 adopted a stratified two-stage random sampling design for both urban and rural areas, including a  
37 systematic mapping and listing of households in the selected primary sampling units (PSUs). The  
38 analysis is based on the publicly available data, in which the identity of selected respondents,  
39 households, and geocodes of PSUs are concealed [33]. In the first stage, the PSUs were selected  
40 based on probability proportional to population size (PPS). Rural PSUs are the villages, while  
41 census enumeration blocks (CEBs) formed the PSUs in urban areas. In the second stage,  
42 systematic random sampling was done in each PSUs to select households for the sample. At  
43 the household level, information were sought from the heads, eligible women age 15 – 49 years,  
44 and men age 15 – 54 years, along with their biomarkers and blood samples on a specially  
45 designed Dried Blood Spots (DBS). A detailed description of the survey design can be found  
46 elsewhere [33].  
47  
48  
49  
50  
51  
52  
53  
54  
55  
56

57 The data used in this study is the fourth round of the Indian National Family Health Survey  
58 (NFHS-4) conducted during 2015-16. The data was downloaded from the DHS website [34].  
59  
60

1  
2  
3 The NFHS series of surveys has been initiated by the Ministry of Health and Family Welfare,  
4 Government of India, and coordinated by the International Institute for Population Sciences,  
5 Mumbai.  
6  
7  
8  
9

### 10 **Sample**

11 The study includes only individuals age 15-49 years who were diagnosed with either  
12 diabetes or hypertension, or both. The total sample size is 22,249, of which 3,284 were males,  
13 and 18,965 were females for the Northeastern region of India.  
14  
15  
16  
17

### 18 **Patient and Public Involvement**

19 No patient involved  
20  
21  
22  
23

### 24 **Measures**

25 **Diabetes:** Fingerstick blood is collected, and blood glucose level is determined using the  
26 FreeStyle Optium H Glucometer. A respondent is considered diagnosed with diabetes if the  
27 random blood sugar level is  $>140\text{mg/dl}$  [33].  
28  
29  
30  
31

32 **Hypertension:** Blood pressure (BP) level was measured using an OMRON Blood Pressure  
33 measuring device. Three separate blood pressure readings were taken with an interval of 5  
34 minutes between readings. A respondent is considered hypertensive if the systolic blood  
35 pressure is  $\geq 140$  mmHg, or diastolic blood pressure  $\geq 90$  mmHg, or if the respondent was  
36 taking antihypertensive medication to lower blood pressure at the time of the survey [33].  
37  
38  
39  
40  
41

42 **Overweight or obesity:** In this study, we categorized continuous body mass index (BMI)  
43 according to the WHO guidelines for the Asian population. A respondent is classified as  
44 overweight or obese if BMI is  $\geq 23$  kg/m<sup>2</sup> [35].  
45  
46  
47  
48  
49

### 50 **Outcome Variables of Interest**

51 **Observed Indicator variables:** The observed variables used as latent indicators are cigarette  
52 smoking (No=1, Yes=2), Alcohol consumption (No=1, Yes=2), Takes aerated drink (No=1,  
53 Yes=2), Overweight or obesity (No=1, Yes=2), Diabetes (No=1, Yes=2), and Hypertension  
54 (No=1, Yes=2).  
55  
56  
57  
58  
59  
60

### **Predictors or Concomitant variables**

1  
2  
3 **Concomitant variables for class determination:** The concomitant variables include age,  
4 gender, education, marital status, and household wealth index. Figure 2 illustrates the  
5 conceptual framework of the study.  
6  
7  
8  
9

### 10 *Statistical Analysis*

11  
12 Latent Class Analysis (LCA), based on structural equation modelling, is a person-  
13 centred analytical approach that allows the identification of homogeneous sub-groups in a  
14 heterogeneous population. LCA is similar to cluster analysis because individuals are  
15 classifying into homogenous unobserved (latent) groups based on the response pattern to a set  
16 of observed variables. However, in cluster analysis, objects are classified based on distance  
17 measures, whereas in LCA classification are based on probabilistic and finite mixture  
18 modelling approach [36,37]. A latent class model splits the population into mutually exclusive  
19 and exhaustive groups that are homogeneous within the groups but differ among them. Several  
20 studies have adopted the LCA approach to identify risk factors clustering within the  
21 heterogeneous population. In a study by Dey et al (2016), based on seven observed risk factors,  
22 LCA was used to classify individuals into two latent class “susceptible to adverse health  
23 outcomes groups” and “not susceptible to adverse health outcomes groups” [38]. Another study  
24 in China applied LCA to ten observed complications and comorbidities of T2 diabetic patients  
25 and categorized the individuals into four latent classes, namely "complications and comorbidity  
26 groups", "high risk of complications group", “high risk of comorbidities and Cardio Vascular  
27 Disease groups”, and “diabetes without complications and comorbidities group” [39]. A study  
28 in West Azerbaijan province among the hypertensive patients aged 50 years and above used  
29 four indicators such as dietary patterns, physical activity, tobacco use, and high blood pressure  
30 control to categorized the hypertensive patients into three latent classes [40].  
31  
32  
33  
34  
35  
36  
37  
38  
39  
40  
41  
42  
43  
44

45 Latent Class Analysis is an innovative statistical method used to identify the latent  
46 classes of homogeneous individuals in a heterogeneous population [39]. The latent class was  
47 performed using the six indicators variables mentioned above. LCA uses observed  
48 dichotomous indicators to identify the unobserved latent class in a heterogeneous population.  
49 To determine the optimal number of latent classes, we examined one to four models. The  
50 optimal number of latent classes was chosen based on the model having the smallest Akaike  
51 Information Criterion (AIC), Consistent Akaike Information Criterion (cAIC), Bayesian-  
52 Schwarz Information Criterion (BIC), adjusted Bayesian-Schwarz Information Criterion  
53 (aBIC), and Entropy [41,42]. A combination of parsimony and interpretability model selection  
54  
55  
56  
57  
58  
59  
60

1  
2  
3 criteria was used to carefully select the number of latent classes so that individuals are allocated  
4 to their most likely class. The outputs of the latent class analysis includes the number of latent  
5 classes, the latent class probability (i.e., the probability that an individual selected at random  
6 belonged to each latent class), and the conditional probability (i.e., the probability that an  
7 individual would give a particular response to a specific item of an observed indicator variable  
8 given that an individual belongs to a specific latent class).  
9

10  
11  
12  
13  
14 To determine the association between the concomitant variables (i.e., age, gender,  
15 education, marital status, and household wealth index) and the latent class, we apply the one-  
16 step technique approach. In this approach, the concomitant variables are included in the latent  
17 class regression model, and their coefficient is estimated simultaneously as part of the latent  
18 class model [43]. This approach has been demonstrated to provide the best and unbiased  
19 coefficient estimates of the concomitant variables as compared to other methods [44].  
20 Statistical analysis was conducted in R statistical software, and LCA was analyze using the  
21 poLCA package (Polytomous Variable Latent Class Analysis) [43].  
22  
23  
24  
25  
26  
27  
28  
29  
30  
31  
32

## 33 **Results**

### 34 *Descriptive statistics*

35  
36  
37 A total of 22,249 individuals with chronic diseases, i.e., diagnosed with diabetes or  
38 hypertension, were included in the analysis (Table 1). Individuals in the age group 45-49 and  
39 15-19 constitute the largest (21.3%) and the lowest (5.0%) respectively in the total sample.  
40 Over half (51.2%) of the sample have completed secondary education, 24.6 percent were  
41 illiterate, and 79.6 percent were currently married. Further, among the chronic disease patients,  
42 the prevalence of smoking, consumption of alcohol, and aerated drinks were 4.2, 14.8, and 68.6  
43 percent respectively. Also, 81.1 percent of the participants reported suffering from  
44 hypertension, and 27.7 percent from diabetes. The sample distribution also indicates that  
45 chronic condition is much higher among females (86.1%) than males (13.9%), among older  
46 ages (age 35+), and among poorer households.  
47  
48  
49  
50  
51  
52  
53  
54  
55  
56  
57  
58  
59  
60

**Table 1: Percent distribution of adults of age 15-49 years with chronic condition (diabetic and hypertensive patients) by selected background characteristics, Northeastern India, NFHS-4, 2015-16.**

| <b>Background Characteristics</b> | <b>% (n=22,249)</b> |
|-----------------------------------|---------------------|
| <b>Age</b>                        |                     |
| 15-19                             | 5.0                 |
| 20-24                             | 8.4                 |
| 25-29                             | 12.2                |
| 30-34                             | 15.0                |
| 35-39                             | 19.2                |
| 40-44                             | 19.0                |
| 45-49                             | 21.3                |
| <b>Sex</b>                        |                     |
| Male                              | 13.9                |
| Female                            | 86.1                |
| <b>Education</b>                  |                     |
| Illiterate                        | 24.6                |
| Primary                           | 16.3                |
| Secondary                         | 51.2                |
| Higher Secondary                  | 8.0                 |
| <b>Marital Status</b>             |                     |
| Never married                     | 13.6                |
| Married                           | 79.6                |
| Widowed/Divorced/Separated        | 6.87                |
| <b>Wealth Index</b>               |                     |
| Poorest                           | 16.7                |
| Poorer                            | 34.6                |
| Middle                            | 22.4                |
| Richer                            | 17.5                |
| Richest                           | 8.8                 |
| <b>Observed Indicators</b>        |                     |
| Smoking                           | 4.2                 |
| Drink alcohol                     | 14.8                |
| Take aerated drinks               | 68.6                |
| Overweight or Obesity             | 43.3                |
| Diabetes                          | 27.7                |
| Hypertension                      | 81.1                |

### ***Model fit and selection of Latent class***

The model fit/selection statistics to derive appropriate models are shown in Table 2. We fit the LCA models with classes ranging from 1 to 4. For each LCA model, the model fit indicators BIC, AIC, cAIC, and Entropy were calculated. According to the model fit indicators, a three-Class model has been selected as the best fit model as it has the lowest BIC and cAIC values. Smaller values on each indicator suggest a better model, or a model with few explanatory variables or parameters, and inform the decision of the best model to be retained [45]. Another diagnostic indicator is entropy [46], which indicates how accurately the model defines the

classes. In general, an entropy value close to 1.0 is considered as ideal [47], and above 0.8 is also acceptable. An entropy value of 1.0 would indicate that every individual has been perfectly classified within the classes based on the responses of the observed indicators. The three latent classes were labelled as “Diabetic with low-risk lifestyle”, “High-risk lifestyle”, and “Hypertensive with low-risk lifestyle”. Figure 3 portrays the graphical representation of item response probability for the indicator’s variables across the latent classes.

**Table 2: Model fit statistics for the latent class models (n=22,249)**

| No of classes | log-likelihood | Residual df | BIC      | aBIC     | cAIC     | likelihood-ratio | Entropy |
|---------------|----------------|-------------|----------|----------|----------|------------------|---------|
| 1             | -69173.1       | 57          | 138406.3 | 138387.2 | 138412.3 | 17350.8          | -       |
| 2             | -61315.4       | 34          | 122921.0 | 122828.9 | 122950.0 | 1859.2           | 1.0     |
| 3             | -58920.2       | 11          | 118361.0 | 118195.7 | 118413.0 | 1168.6           | 0.9     |
| 4             | -59970.1       | -12         | 120691.0 | 120452.6 | 120766.0 | 2396.1           | 0.9     |

Latent class probability and the conditional probability of a “Yes” response for each indicator variables were summarized in Table 3. The last row in Table 3 indicates the probability of class membership in each latent class. About 21 percent of the participants were expected to belong to the Class 1 “diabetic with low-risk lifestyle”, 8 percent to Class 2 “high-risk lifestyle”, and 71 percent to Class 3 “hypertensive with low-risk lifestyle”. Members in Class 1 were likely to report having high blood sugar level (diabetic) and unlikely to smoke cigarette or drinking alcohol. Members in Class 2 are more likely to smoke cigarette and drink alcohol, and members in Class 3 are likely to report having high blood pressure and unlikely to smoke cigarette or drink alcohol.

**Table 3: The conditional probability of the response items and the latent class probability for study sample in Northeastern India, NFHS-4, 2015-16**

| Indicator Variables             | Diabetic with low-risk lifestyle (Class 1) | High-risk lifestyle (Class 2) | Hypertensive with low-risk lifestyle (Class 3) |
|---------------------------------|--------------------------------------------|-------------------------------|------------------------------------------------|
| Smoking                         | 0.04                                       | 0.55                          | 0.02                                           |
| Drink alcohol                   | 0.12                                       | 0.81                          | 0.14                                           |
| Take aerated drinks             | 0.76                                       | 0.78                          | 0.77                                           |
| Overweight or Obesity           | 0.44                                       | 0.52                          | 0.51                                           |
| Diabetic                        | 1.00                                       | 0.25                          | 0.11                                           |
| Hypertensive                    | 0.00                                       | 0.88                          | 1.00                                           |
| <b>Latent class probability</b> | <b>0.21</b>                                | <b>0.08</b>                   | <b>0.71</b>                                    |

Table 4 presents the distribution of socio-economic and demographic characteristics of the individuals by the three latent classes. Age, gender, education, marital status, and household



wealth index were statistically found significantly associated with the three latent classes at 1 percent level of significant. The hypertensive with low-risk lifestyle class has the highest proportion of respondents aged 45-49 years, whereas both diabetic with low-risk lifestyle class and high-risk lifestyle class has the highest proportion of respondents aged 35-39 years (19.4% and 19.5% respectively). Both the diabetic with low-risk lifestyle class (10.6% males vs. 89.4% females) and the hypertensive with low-risk lifestyle class (6.2% males vs. 93.8% females) has the highest proportion of females; males constituted almost 100 percent of the high-risk lifestyle class (99.2% males vs. 0.8% females). Lower proportion of the respondents have completed higher secondary education in case of both diabetic with low-risk lifestyle class (10.5%) and hypertensive with low-risk lifestyle class (8.5%). Marital status shows a similar pattern in all the three classes; higher proportion of married respondents and lower proportion of widowed/divorced/separated respondents (<10%). The Wealth index shows that respondents belonging to the middle quintile constituted the largest proportion in the diabetic with low-risk lifestyle class (27.2%), and high-risk lifestyle class (26.6%). However, respondents belonging to the poorer wealth quintile have the highest proportion of hypertensive with low-risk lifestyle class (29.4%).

**Table 4: Percent distribution of diabetic and hypertensive patients age 15-49 years according to three latent classes by background characteristics, Northeastern India, NFHS-4, 2015-16**

| Background Characteristics     | “Diabetic with low-risk lifestyle” class (n=4727, 21%) | “High-risk lifestyle” class (n=1828, 8%) | “Hypertensive with low-risk lifestyle” class (n=15,694, 71%) | P-value <sup>a</sup> |
|--------------------------------|--------------------------------------------------------|------------------------------------------|--------------------------------------------------------------|----------------------|
| <b>Age</b>                     |                                                        |                                          |                                                              | <0.01                |
| 15-19                          | 8.08                                                   | 3.06                                     | 4.96                                                         |                      |
| 20-24                          | 8.99                                                   | 8.37                                     | 7.6                                                          |                      |
| 25-29                          | 12.88                                                  | 13.51                                    | 11.93                                                        |                      |
| 30-34                          | 15.30                                                  | 18.00                                    | 15.29                                                        |                      |
| 35-39                          | 19.40                                                  | 19.53                                    | 19.46                                                        |                      |
| 40-44                          | 17.73                                                  | 19.09                                    | 19.04                                                        |                      |
| 45-49                          | 17.62                                                  | 18.44                                    | 21.72                                                        |                      |
| <b>Gender</b>                  |                                                        |                                          |                                                              | <0.01                |
| Male                           | 10.62                                                  | 99.18                                    | 6.17                                                         |                      |
| Female                         | 89.38                                                  | 0.82                                     | 93.83                                                        |                      |
| <b>Education</b>               |                                                        |                                          |                                                              | <0.01                |
| Illiterate                     | 17.96                                                  | 11.65                                    | 25.17                                                        |                      |
| Primary                        | 16.50                                                  | 15.10                                    | 15.85                                                        |                      |
| Secondary                      | 55.05                                                  | 58.70                                    | 50.50                                                        |                      |
| Higher Secondary               | 10.49                                                  | 14.55                                    | 8.47                                                         |                      |
| <b>Marital Status</b>          |                                                        |                                          |                                                              | <0.01                |
| Never married                  | 19.93                                                  | 21.55                                    | 14.30                                                        |                      |
| Married                        | 72.75                                                  | 75.22                                    | 78.41                                                        |                      |
| Widowed/Divorced/Se<br>parated | 7.32                                                   | 3.23                                     | 7.30                                                         |                      |

| <b>Wealth Index</b> |              |              |              | <0.01 |
|---------------------|--------------|--------------|--------------|-------|
| Poorest             | 10.94        | 12.14        | 12.94        |       |
| Poorer              | 26.06        | 24.84        | 29.43        |       |
| Middle              | 27.23        | 26.64        | 26.30        |       |
| Richer              | 22.49        | 23.34        | 21.25        |       |
| Richest             | 13.29        | 12.04        | 10.07        |       |
| <b>Total</b>        | <b>100.0</b> | <b>100.0</b> | <b>100.0</b> |       |

Note: <sup>a</sup>Based on chi-squared tests of association.

### ***Covariates predicting latent class membership***

Table 5 summarized the odds ratios (OR) results from the latent regression model. Compared with respondents in the 15-19 years age group, those in the 20-29 age group were 4.1 times (OR=4.10; p<0.01) more likely to belong to class 2 (high-risk lifestyle) than to class 1 (diabetic with low-risk lifestyle). Similarly, compared with respondents in the 15-19 years age group, those in the 45-49 age group were 1.7 times (OR=1.73; p<0.01) more likely to belong to class 3 (hypertensive with low-risk lifestyle) than to class 1 (diabetic with low-risk lifestyle). Also, we observed that the odds of being in class 3 increases with the age of the respondents. With respect to males, females were less likely (OR=0.002; p<0.01) to belong to class 2 but more likely (OR=1.46; p<0.01) to belong to class 3. Higher odds of being in class 2-3 than to class 1 was observed among the married respondents (OR=1.54). Similarly, widowed/divorced/separated were more likely to be in class 2 (OR=3.35; p<0.01), but less likely to be in class 3 (OR=0.98; p<0.01). Moreover, compared to the illiterate respondents, those with higher secondary education were less likely to belong to class 3 than to class 1 (OR=0.79; p<0.01), and being in the richest wealth quintile lower is the odds of being in class 3 than in class 1 (OR=0.69; p<0.01).

**Table 5: The odds for various latent classes of lifestyle behaviours and their associated covariates among individuals age 15-49 years, Northeastern India, NFHS-4, 2015-16**

| <b>Background Characteristics</b> | <b>Class 2 vs Class 1</b> |             | <b>Class 3 vs Class 1</b> |             |
|-----------------------------------|---------------------------|-------------|---------------------------|-------------|
|                                   | <b>Odds Ratio</b>         | <b>S. E</b> | <b>Odds Ratio</b>         | <b>S. E</b> |
| <b>Age</b>                        |                           |             |                           |             |
| 15-19                             | Ref                       |             | Ref                       |             |
| 20-24                             | 4.10 ***                  | 0.25        | 1.27 **                   | 0.09        |
| 25-29                             | 5.10 ***                  | 0.25        | 1.34 ***                  | 0.09        |
| 30-34                             | 5.70 ***                  | 0.26        | 1.42 ***                  | 0.09        |
| 35-39                             | 3.53 ***                  | 0.26        | 1.42 ***                  | 0.09        |
| 40-44                             | 3.82 ***                  | 0.27        | 1.51 ***                  | 0.09        |
| 45-49                             | 3.46 ***                  | 0.27        | 1.73 ***                  | 0.09        |
| <b>Gender</b>                     |                           |             |                           |             |
| Male                              | Ref                       |             | Ref                       |             |
| Female                            | 0.002 ***                 | 0.34        | 1.46 ***                  | 0.07        |

|                            |          |      |          |      |
|----------------------------|----------|------|----------|------|
| <b>Education</b>           |          |      |          |      |
| Illiterate                 | Ref      |      | Ref      |      |
| Primary                    | 1.03     | 0.19 | 0.73 *** | 0.06 |
| Secondary                  | 1.08     | 0.17 | 0.79 *** | 0.05 |
| Higher Secondary           | 0.70     | 0.21 | 0.79 *** | 0.08 |
| <b>Marital Status</b>      |          |      |          |      |
| Never married              | Ref      |      | Ref      |      |
| Married                    | 1.54 **  | 0.15 | 1.16 **  | 0.06 |
| Widowed/Divorced/Separated | 3.35 *** | 0.35 | 0.98     | 0.08 |
| <b>Wealth Index</b>        |          |      |          |      |
| Poorest                    | Ref      |      | Ref      |      |
| Poorer                     | 0.90     | 0.18 | 1.00     | 0.06 |
| Middle                     | 1.02     | 0.18 | 0.87 **  | 0.07 |
| Richer                     | 1.14     | 0.19 | 0.86 *   | 0.07 |
| Richest                    | 1.13     | 0.22 | 0.69 *** | 0.08 |

Ref: Reference group; \*\*\*p-value<0.01; \*\*p-value<0.05; \*p-value<0.1; S.E: Standard Error; Reference group: Class 1

## Discussion

This study is the first attempt in Northeastern India, a region characterized by a seemingly homogenous racial group but inhabited by ethno-lingually diverse sub-populations, that applied latent class analysis to provide evidence about the pattern of modifiable risk factors among people suffering from diabetes or hypertension. Based on the observed modifiable health risk behaviours, the LCA suggests presence of three classes of respondents with diabetes or hypertension: “diabetic with low-risk lifestyle”, “high-risk lifestyle”, and “hypertensive with low-risk lifestyle”. The findings portray that the 22,249 odd diabetic or hypertensive persons in the region can be categorized into three groups or classes, with homogeneity in their characteristics within the group but heterogeneous between the groups. One of the three latent classes has a 100 percent likelihood of having one of the risk factors combined with a low and moderate probability of having the other five risk factors. Each of the classes exhibit a unique risk factor configuration, and socio-economic and demographic profiles from one another. Thus, chronic diseases prevention programmes that specially target and reach out to the at-risk sub-populations will be beneficial and effective, as illustrated in this analysis (Table 3 and 5).

More than 70 percent of the respondents belong to the class “hypertensive with low-risk lifestyle” have their blood pressure level higher than normal and less likely to smoke and use alcohol. Evidence from a large body of existing literature supports that cigarette smoking leads to an immediate increase in blood pressure level and heart rate [48]. The effect of cigarette smoking on blood pressure and heart rate is largely due to the nicotine content in the cigarettes [48]. However, studies also found a significant elevation in blood pressure and an increase in

1  
2  
3 the prevalence of hypertension following smoking cessation [49,50], which could possibly be  
4 due to post-cessation weight gain [48,49]. Green et al. (1986) had concluded that smoking  
5 cessation in itself is not likely to result in a lowering blood pressure but on the contrary it may  
6 result even in higher blood pressure [51]. Moreover, about 8 percent of the respondents  
7 belonging to the “high-risk lifestyle” class mostly drink alcohol and smoke cigarettes. This co-  
8 occurrence of alcohol use and cigarette smoking have been well documented in the existing  
9 studies [52,53], and evidence suggest that a common genetic trait play a role in the co-  
10 occurrence of smoking and alcohol use [54,55]. Epidemiological studies have also shown that  
11 individuals who are dependent on nicotine are more than four time more likely to be dependent  
12 on alcohol. Similarly, individuals who are dependent on alcohol are also more than three times  
13 more likely to be dependent on nicotine with reference to the general population [56]. Stress is  
14 another factor that influences use of tobacco and alcohol. For example, people who drink  
15 alcohol are most likely to smoke in an attempt to overcome stress [57]. Literature also suggest  
16 cross tolerance effect between alcohol and tobacco. It is found that the stimulating effect of  
17 nicotine in tobacco is restrained by the sedating effect of alcohol, which entices smokers to  
18 drink more alcohol [58]. Alcohol’s sedating effect reduces the physiological effect of nicotine,  
19 thus increasing the consumption of tobacco.  
20  
21  
22  
23  
24  
25  
26  
27  
28  
29  
30  
31  
32

33 In all the three identified classes, a vast majority of diabetic or hypertensive persons  
34 appear to have a habit of consuming aerated drinks and an uncontrolled body weight. Studies  
35 suggest that sugar-sweetened beverages intake is the major contributor to weight gain and can  
36 increase the risk of T2 diabetes and hypertension [59,60]. Cross-sectional studies acknowledge  
37 the positive association between overweight and obesity with the consumption of aerated  
38 drinks or sugar-sweetened beverages. For example, studies infer that women who consumed  
39 sweetened beverages more than once a week were more likely to be overweight than those who  
40 consumed sweetened beverages less than once a week [61]. Other studies found that women  
41 who consumed sugar-sweetened beverages regularly were heavier by 0.2 kg than the non-  
42 consumers [62]. The intake of sodas sweetened with high-fructose corn syrup is associated  
43 with hypertension among adolescents population [63]. Also, a spurt in the prevalence of  
44 hypertension have been observed among individuals who consumed more than average amount  
45 of fructose [64]. Evidence from a cross-sectional study in Northeast India supports the positive  
46 correlation between overweight or obesity with diabetes and hypertension [26]. The plausible  
47 explanation is that both sugar sweetened beverages and artificial sweetened beverages are  
48 associated with the development of metabolic derangements that in turn might lead to elevated  
49  
50  
51  
52  
53  
54  
55  
56  
57  
58  
59  
60

1  
2  
3 blood pressure [65]. High intake of sugar-sweetened beverages contributes to a higher total  
4 energy consumption, which increases energy intake without an increase in energy expenditure  
5 certainly results in weight gain. There is no dearth of scientific evidence which support the  
6 notion that decreasing aerated drinks consumption reduces the prevalence of overweight and  
7 obesity.  
8  
9

10  
11  
12 As observed in a previous study [66], this study also found that those aged 20 years and  
13 above are more likely to be in the 'high-risk cluster' than those below 20 years. Studies have  
14 elucidated that the adolescence or teenage stage is just the initial stage when an individual starts  
15 using or exposed to alcohol or tobacco (smoking) products. However, as this behaviour  
16 becomes a habit later on, it subsequently accentuates the intensity of substance (ab)use among  
17 older adults [67,68]. Also, it is well documented that initiation of smoking and drinking alcohol  
18 at an early age is associated with the number of cigarettes smoked and the quantity of alcohol  
19 consumed per day in adult age. According to Investigator (1991) and Dawson et al. (2008),  
20 individuals who began to smoke or drink before the age of 20 years were most likely to  
21 consumed a large volume of alcohol and smoked more cigarettes per day as compared to those  
22 who started after the age of 20 or above [69,70]. Further, compared to young adults, older  
23 adults were more likely to report high blood pressure and less likely to smoke or drink alcohol.  
24 One reason could be the existing condition of high blood pressure; an older adult was most  
25 likely to have taken a precaution by lowering or quitting smoking and alcohol consumption to  
26 prevent further deterioration of health. Evidence from a recent study among older adults  
27 demonstrated that the main reason for smoking cessation attempt was the motivation towards  
28 better health [71]. Hypertensive smokers were encouraged to quit smoking because of the risk  
29 of developing a severe form of hypertension such as malignant and renovascular hypertension  
30 [72]. Gender factors are also found to be significantly associated with class 2 "high-risk  
31 lifestyle" and 3 "hypertensive with low-risk lifestyle". Consistent with the previous studies, in  
32 this study also, female respondents were less likely to be in the high-risk cluster than males  
33 [73]. One primary reason stated is that smoking and drinking alcohol by women is not socially  
34 and culturally accepted by many [74], and women are more concerned about their health and  
35 tend to avoid unhealthy lifestyle behaviours [75]. In our study, individuals from a wealthier  
36 household with higher education were less likely to belong to a cluster of hypertensive with  
37 low substance use. An individual with higher education and better income can afford to pay for  
38 a healthier lifestyle, including regular physical exercise, accessibility to advanced and quality  
39 healthcare services, as such efforts may reduce the risk of hypertension [76,77]. Being  
40  
41  
42  
43  
44  
45  
46  
47  
48  
49  
50  
51  
52  
53  
54  
55  
56  
57  
58  
59  
60

1  
2  
3 widowed/divorced/separated tend to increase the likelihood of falling into the high-risk cluster.  
4 Substance use by marital status indicated that widowed or divorced individuals are most likely  
5 to consumed alcohol, cigarette, and marijuana as compared to singles [78,79].  
6  
7

8  
9 A search of similar studies indicates that no study in India or Northeast India has  
10 examined the clustering of health risk factors using the latent class approach. However, our  
11 study has some limitations. Firstly, the cross-sectional design of the study restricts us to  
12 measure the causal effect. Second, due to the dichotomous response on alcohol consumption,  
13 we cannot measure the quantity of alcohol an individual consumed. Lastly, information on  
14 social groups and occupations could not be included in the analysis because of the large number  
15 of missing cases in these variables.  
16  
17  
18  
19  
20

## 21 **Conclusion**

22  
23 In Northeastern India, as this study illustrates, there are three classes of modifiable risk factors  
24 closely related to the risk of chronic diseases (diabetes and hypertension). In addition, the study  
25 also identified factors that uniquely distinguished the identified classes. The intake of aerated  
26 drinks and obesity are the common modifiable risk factors in all three classes. As an initiative  
27 to healthy lifestyle behaviours, the findings suggest that males should control smoking and  
28 alcohol consumption, while females should control body weight and blood pressure. Further,  
29 we found that marital status and gender could be the catalyst to prevent high-risk smoking and  
30 alcohol drinking in Northeastern India. Also, the study observes smoking and alcohol use are  
31 the two modifiable risk behaviours, which tends to co-occur within an individual. Therefore, it  
32 is recommended that policy and intervention programmes in Northeastern India that promote  
33 healthy lifestyles should focus on targeting multiple modifiable risk behaviours that are most  
34 likely to co-occur within an individual. On the other hand, awareness about adapting to healthy  
35 diets and weight control along with physical exercises should be promoted with rigour in the  
36 region.  
37  
38  
39  
40  
41  
42  
43  
44  
45  
46  
47

48  
49 **Acknowledgement:** The authors are thankful to the editor and the two reviewers for their  
50 insightful comments and valuable suggestions, which hugely improved the analysis and the  
51 overall quality of the paper.  
52  
53

54  
55 **Contributors:** Conceived and designed the research paper: SPM, HL. Analysed the data: SPM,  
56 HSC. Contributed agents/materials/analysis tools: SPM, HL, HSC. Drafting manuscript: SPM,  
57 HSC. Refined the manuscript: SPM, HL, HSC.  
58  
59  
60

**Funding:** This research received no specific grant from any funding agency in the public, commercial or not-for-profit sectors.

**Competing Interest:** None declared.

**Patient consent for publication:** Not applicable

**Ethics approval:** This study is based on the secondary data which is publicly available from the Demographic Health Survey website and the respondents are de-identified, hence ethical approval is not required for this study.

**Data availability statement:** Data stored and maintained by the Demographic Health Survey office, and available to public at [https://dhsprogram.com/data/dataset/India\\_Standard-DHS\\_2015.cfm?flag=1](https://dhsprogram.com/data/dataset/India_Standard-DHS_2015.cfm?flag=1) upon request.

**Word count:** 4464

## References

- 1 Chobanian A V, Bakris GL, Black HR, *et al.* The Seventh Report of the Joint National Committee on Prevention, Detection, Evaluation, and Treatment of High Blood Pressure: the JNC 7 report. *JAMA* 2003;**289**:2560–72. doi:10.1001/jama.289.19.2560
- 2 International Diabetes Federation. Advocacy guide to the IDF Diabetes Atlas Ninth edition 2019. Brussels, Belgium:International Diabetes Federation: 2019. <http://www.diabetesatlas.org/> (accessed 14 Nov 2019).
- 3 Ford ES, Zhao G, Tsai J, *et al.* Low-Risk Lifestyle Behaviors and All-Cause Mortality: Findings From the National Health and Nutrition Examination Survey III Mortality Study. *Am J Public Health* 2011;**101**:1922–9. doi:10.2105/AJPH.2011.300167
- 4 Geldsetzer P, Manne-Goehler J, Theilmann M, *et al.* Geographic and sociodemographic variation of cardiovascular disease risk in India: A cross-sectional study of 797,540 adults. *PLOS Med* 2018;**15**:e1002581. doi:10.1371/journal.pmed.1002581
- 5 Ghosh S, Kumar M. Prevalence and associated risk factors of hypertension among persons aged 15–49 in India: a cross-sectional study. *BMJ Open* 2019;**9**:e029714. doi:10.1136/bmjopen-2019-029714
- 6 Gupta R, Gaur K, S. Ram CV. Emerging trends in hypertension epidemiology in India. *J Hum Hypertens* 2019;**33**:575–87. doi:10.1038/s41371-018-0117-3
- 7 Tandon N, Anjana RM, Mohan V, *et al.* The increasing burden of diabetes and variations

- 1  
2  
3 among the states of India: the Global Burden of Disease Study 1990-2016. *Lancet Glob*  
4 *Heal* 2018;6:e1352–62. doi:10.1016/S2214-109X(18)30387-5  
5  
6  
7  
8 WHO. (2014). Global status report on noncommunicable diseases 2014. In World  
9 Health Organization.  
10  
11  
12 9 Kvaavik, E. (2010). Influence of Individual and Combined Health Behaviors on Total  
13 and Cause-Specific Mortality in Men and Women. *Archives of Internal Medicine*,  
14 170(8), 711. <https://doi.org/10.1001/archinternmed.2010.76>  
15  
16  
17  
18 10 Loef, M., & Walach, H. (2012). The combined effects of healthy lifestyle behaviors on  
19 all cause mortality: A systematic review and meta-analysis. *Preventive Medicine*, 55(3),  
20 163–170. <https://doi.org/10.1016/j.ypmed.2012.06.017>  
21  
22  
23  
24 11 Ha S, Choi HR, Lee YH. Clustering of four major lifestyle risk factors among Korean  
25 adults with metabolic syndrome. *PLoS One* 2017;12:e0174567.  
26 doi:10.1371/journal.pone.0174567  
27  
28  
29  
30 12 Poortinga W. The prevalence and clustering of four major lifestyle risk factors in an  
31 English adult population. *Prev Med (Baltim)* 2007;44:124–8.  
32 doi:10.1016/j.ypmed.2006.10.006  
33  
34  
35  
36 13 Schuit AJ, van Loon AJM, Tijhuis M, *et al.* Clustering of Lifestyle Risk Factors in a  
37 General Adult Population. *Prev Med (Baltim)* 2002;35:219–24.  
38 doi:10.1006/pmed.2002.1064  
39  
40  
41  
42 14 Leventhal AM, Huh J, Dunton GF. Clustering of modifiable biobehavioral risk factors  
43 for chronic disease in US adults: a latent class analysis. *Perspect Public Health*  
44 2014;134:331–8. doi:10.1177/1757913913495780  
45  
46  
47  
48 15 Lisha NE, Martens M, Leventhal AM. Age and gender as moderators of the  
49 relationship between physical activity and alcohol use. *Addict Behav* 2011;36:933–6.  
50 doi:10.1016/j.addbeh.2011.04.003.  
51  
52  
53  
54 16 Akbartabartoori M, Lean MEJ, Hankey CR. Relationships between cigarette smoking,  
55 body size and body shape. *Int J Obes* 2005;29:236–43. doi:10.1038/sj.ijo.0802827  
56  
57  
58  
59 17 Shaikh R, Khan J. Clustering of lifestyle risk factors among adult population in India:  
60 A cross-sectional analysis from 2005 to 2016. *PLoS One* 2021;16:e0244559.  
doi:10.1371/journal.pone.0244559



- 1  
2  
3 18 Atorkey P, Owiredua C. Clustering of multiple health risk behaviours and association  
4 with socio-demographic characteristics and psychological distress among adolescents  
5 in Ghana: A latent class analysis. *SSM - Popul Heal* 2021;13:100707.  
6  
7 doi:10.1016/j.ssmph.2020.100707  
8  
9
- 10 19 Bishops AC, De Neve J-W, Awasthi A, *et al.* A cross-sectional study of  
11 cardiovascular disease risk clustering at different socio-geographic levels in India. *Nat*  
12 *Commun* 2020;11:5891. doi:10.1038/s41467-020-19647-3  
13  
14  
15
- 16 20 Laxer RE, Brownson RC, Dubin JA, *et al.* Clustering of risk-related modifiable  
17 behaviours and their association with overweight and obesity among a large sample of  
18 youth in the COMPASS study. *BMC Public Health* 2017;17:102. Doi:10.1186/s12889-  
19 017-4034-0  
20  
21  
22
- 23 21 Lee DH, Nam JY, Kwon S, *et al.* Lifestyle risk score and mortality in Korean adults: a  
24 population-based cohort study. *Sci Rep* 2020;10:10260. doi:10.1038/s41598-020-  
25 66742-y  
26  
27  
28
- 29 22 Gao B, Zhang L, Wang H. Clustering of Major Cardiovascular Risk Factors and the  
30 Association with Unhealthy Lifestyles in the Chinese Adult Population. *PLoS One*  
31 2013;8:e66780. doi:10.1371/journal.pone.0066780  
32  
33  
34
- 35 23 Hart CL, Davey Smith G, Gruer L, *et al.* The combined effect of smoking tobacco and  
36 drinking alcohol on cause-specific mortality: A 30 year cohort study. *BMC Public*  
37 *Health* 2010;10. doi:10.1186/1471-2458-10-789  
38  
39  
40
- 41 24 Sobngwi E, Mbanya J-CN, Unwin N, *et al.* Physical activity and its relationship with  
42 obesity, hypertension and diabetes in urban and rural Cameroon. *Int J Obes*  
43 2002;26:1009–16. doi:10.1038/sj.ijo.0802008  
44  
45  
46
- 47 25 Bani T Aeri DS. Risk Factors Associated with the Increasing Cardiovascular Diseases  
48 Prevalence in India: A Review. *J Nutr Food Sci* 2014;05:1–6. doi:10.4172/2155-  
49 9600.1000331  
50  
51  
52
- 53 26 Marbaniang SP, Lhungdim H, Yadav B, *et al.* Overweight/obesity risks and prevalence  
54 of diabetes and hypertension in North Eastern India: An analysis using seemingly  
55 unrelated probit model. *Clin Epidemiol Glob Heal* 2021;11:100764.  
56  
57 doi:10.1016/j.cegh.2021.100764  
58  
59  
60

- 1  
2  
3 27 Umamahesh K, Vigneswari A, Surya Thejaswi G, *et al.* Incidence of cardiovascular  
4 diseases and associated risk factors among subjects with type 2 diabetes – An 11-year  
5 follow up study. *Indian Heart J* 2014;**66**:5–10. doi:10.1016/j.ihj.2013.12.009  
6  
7  
8  
9 28 Sarveswaran G, Kulothungan V, Mathur P. Clustering of noncommunicable disease  
10 risk factors among adults (18–69 years) in rural population, South-India. *Diabetes*  
11 *Metab Syndr Clin Res Rev* 2020;**14**:1005–14. doi:10.1016/j.dsx.2020.05.042  
12  
13  
14  
15 29 Schreiber JB. Latent Class Analysis: An example for reporting results. *Res Soc Adm*  
16 *Pharm* 2017;**13**:1196–201. doi:10.1016/j.sapharm.2016.11.011  
17  
18  
19 30 Weller BE, Bowen NK, Faubert SJ. Latent Class Analysis: A Guide to Best Practice. *J*  
20 *Black Psychol* 2020;**46**:287–311. doi:10.1177/0095798420930932  
21  
22  
23 31 Marbaniang SP. Women Care and Practices in the Management of Childhood Diarrhea  
24 in Northeast India. *Child Care Pract* 2020;:1–13.  
25 doi:10.1080/13575279.2020.1812534  
26  
27  
28  
29 32 Dikshit KR, Dikshit JK. Population of the North-Eastern States of India. In: *North-*  
30 *East India: Land, People and Economy. Advances in Asian Human-Environmental*  
31 *Research*. Dordrecht: : Springer 2014. 421–56. doi:10.1007/978-94-007-7055-3\_12  
32  
33  
34  
35 33 International Institute for Population Sciences (IIPS) and ICF. National Family Health  
36 Survey (NFHS-4), 2015-16: India. Mumbai:IIPS: 2017. [http://rchiips.org/nfhs/NFHS-](http://rchiips.org/nfhs/NFHS-4Reports/India.pdf)  
37 [4Reports/India.pdf](http://rchiips.org/nfhs/NFHS-4Reports/India.pdf)  
38  
39  
40  
41 34 DHS. The DHS Program-India: Standard DHS, 2015-16 Dataset,. Demogr. Heal. Surv.  
42 2017.[https://dhsprogram.com/data/dataset/India\\_Standard-DHS\\_2015.cfm?flag=1](https://dhsprogram.com/data/dataset/India_Standard-DHS_2015.cfm?flag=1)  
43  
44  
45 35 Barba C, Cavalli-Sforza T, Cutter J, *et al.* Appropriate body-mass index for Asian  
46 populations and its implications for policy and intervention strategies. *Lancet*  
47 2004;**363**:157–63. doi:10.1016/S0140-6736(03)15268-3  
48  
49  
50  
51 36 Islam MM, Valderas JM, Yen L, *et al.* Multimorbidity and Comorbidity of Chronic  
52 Diseases among the Senior Australians: Prevalence and Patterns. *PLoS One*  
53 2014;**9**:e83783. doi:10.1371/journal.pone.0083783  
54  
55  
56 37 Brusco MJ, Shireman E, Steinley D. A comparison of latent class, K-means, and K-  
57 median methods for clustering dichotomous data. *Psychol Methods* 2017;**22**:563–80.  
58 doi:10.1037/met0000095  
59  
60

- 1  
2  
3 38 Dey A, Chakraborty A, Majumdar K, *et al.* Application of latent class analysis to  
4 estimate susceptibility to adverse health outcomes based on several risk factors. *Int J*  
5 *Community Med Public Heal* 2016;**3**:3423–9. doi:10.18203/2394-  
6 6040.ijcmph20164268  
7  
8  
9  
10  
11 39 Gao F, Chen J, Liu X, *et al.* Latent class analysis suggests four classes of persons with  
12 type 2 diabetes mellitus based on complications and comorbidities in Tianjin, China: a  
13 cross-sectional analysis. *Endocr J* 2017;**64**:1007–16. doi:10.1507/endocrj.EJ17-0199  
14  
15  
16 40 Ghanbari J, Mohammadpoorasl A, Jahangiry L, *et al.* Subgroups of lifestyle patterns  
17 among hypertension patients: a latent-class analysis. *BMC Med Res Methodol*  
18 2018;**18**:127. doi:10.1186/s12874-018-0607-6  
19  
20  
21  
22 41 Sugiura N. Further analysts of the data by akaike' s information criterion and the finite  
23 corrections. *Commun Stat - Theory Methods* 1978;**7**:13–26.  
24 doi:10.1080/03610927808827599  
25  
26  
27  
28 42 Akaike H. A New Look at the Statistical Model Identification. 1974. 215–22.  
29 doi:10.1007/978-1-4612-1694-0\_16  
30  
31  
32 43 Linzer DA, Lewis JB. polLCA : An R Package for Polytomous Variable Latent Class  
33 Analysis. *J Stat Softw* 2011;**42**. doi:10.18637/jss.v042.i10  
34  
35  
36 44 Bolck A, Croon M, Hagenaars J. Estimating latent structure models with categorical  
37 variables: One-step versus three-step estimators. *Polit Anal* 2004;**12**:3–27.  
38 doi:10.1093/pan/mp01  
39  
40  
41  
42 45 Rosato NS, Baer JC. Latent class analysis: A method for capturing heterogeneity. *Soc*  
43 *Work Res* 2012;**36**:61–9. doi:10.1093/swr/svs006  
44  
45  
46 46 Wang M-C, Deng Q, Bi X, *et al.* Performance of the entropy as an index of  
47 classification accuracy in latent profile analysis: A Monte Carlo simulation study. *Acta*  
48 *Psychol Sin* 2017;**49**:1473. doi:10.3724/SP.J.1041.2017.01473  
49  
50  
51  
52 47 Celeux G, Soromenho G. An entropy criterion for assessing the number of clusters in a  
53 mixture model. *J Classif* 1996;**13**:195–212. doi:10.1007/BF01246098  
54  
55  
56 48 Omvik P. How smoking affects blood pressure. *Blood Press* 1996;**5**:71–7.  
57 doi:10.3109/08037059609062111  
58  
59  
60

- 1  
2  
3 49 Jenner DA, Puddey IB, Beilin LJ, *et al.* Lifestyle- and occupation-related changes in  
4 blood pressure over a six-year period in a cohort of working men. *J Hypertens Suppl*  
5 *Off J Int Soc Hypertens* 1988;**6**:S605-7. doi:10.1097/00004872-198812040-00189  
6  
7  
8  
9 50 Gerace TA, Hollis J, Ockene JK, *et al.* Smoking cessation and change in diastolic  
10 blood pressure, body weight, and plasma lipids. MRFIT Research Group. *Prev Med*  
11 *(Baltim)* 1991;**20**:602–20. doi:10.1016/0091-7435(91)90058-c  
12  
13  
14  
15 51 Green MS, Jucha E, Luz Y. Blood pressure in smokers and nonsmokers:  
16 Epidemiologic findings. *Am Heart J* 1986;**111**:932–40. doi:10.1016/0002-  
17 8703(86)90645-9  
18  
19  
20  
21 52 Ho RKS, Fok PWY, Chan HCH. Pattern and determinants of alcohol and tobacco co-  
22 use and its relationship with smoking cessation in Hong Kong. *Tob Prev & Cessat*  
23 *2021*;**7**:1–9. doi:10.18332/tpc/132288  
24  
25  
26  
27 53 Jiang N, Lee YO, Ling PM. Association between tobacco and alcohol use among  
28 young adult bar patrons: a cross-sectional study in three cities. *BMC Public Health*  
29 *2014*;**14**:500. doi:10.1186/1471-2458-14-500  
30  
31  
32  
33 54 Slutske WS. Common Genetic Vulnerability for Pathological Gambling and Alcohol  
34 Dependence in Men. *Arch Gen Psychiatry* 2000;**57**:666–73.  
35 doi:10.1001/archpsyc.57.7.666  
36  
37  
38  
39 55 Bierut LJ, Schuckit MA, Hesselbrock V, *et al.* Co-occurring risk factors for alcohol  
40 dependence and habitual smoking. *Alcohol Res Health* 2000;**24**:233–  
41 41. <http://www.ncbi.nlm.nih.gov/pubmed/15986718>  
42  
43  
44  
45 56 Grant BF, Hasin DS, Chou SP, *et al.* Nicotine Dependence and Psychiatric Disorders  
46 in the United States. *Arch Gen Psychiatry* 2004;**61**:1107.  
47 doi:10.1001/archpsyc.61.11.1107  
48  
49  
50  
51 57 Lyon RJ, Tong JE, Leigh G, *et al.* The influence of alcohol and tobacco on the  
52 components of choice reaction time. *J Stud Alcohol* 1975;**36**:587–96.  
53 doi:10.15288/jsa.1975.36.587  
54  
55  
56  
57 58 de Fiebre CM, Collins AC. A comparison of the development of tolerance to ethanol  
58 and cross-tolerance to nicotine after chronic ethanol treatment in long- and short-sleep  
59 mice. *J Pharmacol Exp Ther* 1993;**266**:1398–406.  
60

- 1  
2  
3 59 Malik VS, Popkin BM, Bray GA, *et al.* Sugar-sweetened beverages, obesity, type 2  
4 diabetes mellitus, and cardiovascular disease risk. *Circulation* 2010;**121**:1356–64.  
5 doi:10.1161/CIRCULATIONAHA.109.876185  
6  
7  
8  
9 60 Qin P, Li Q, Zhao Y, *et al.* Sugar and artificially sweetened beverages and risk of  
10 obesity, type 2 diabetes mellitus, hypertension, and all-cause mortality: a dose–  
11 response meta-analysis of prospective cohort studies. *Eur J Epidemiol* 2020;**35**:655–  
12 71. doi:10.1007/s10654-020-00655-y  
13  
14  
15  
16 61 Liebman M, Pelican S, Moore SA, *et al.* Dietary intake, eating behavior, and physical  
17 activity-related determinants of high body mass index in rural communities in  
18 Wyoming, Montana, and Idaho. *Int J Obes* 2003;**27**:684–92.  
19 doi:10.1038/sj.ijo.0802277  
20  
21  
22  
23  
24 62 French S, Jeffery R, Forster J, *et al.* Predictors of weight change over two years among  
25 a population of working adults: the Healthy Worker Project. *Int J Obes Relat Metab*  
26 *Disord* 1994;**18** 3:145–54.  
27  
28  
29  
30 63 Nguyen S, Choi HK, Lustig RH, *et al.* Sugar-Sweetened Beverages, Serum Uric Acid,  
31 and Blood Pressure in Adolescents. *J Pediatr* 2009;**154**:807–13.  
32 doi:10.1016/j.jpeds.2009.01.015  
33  
34  
35  
36 64 Jalal DI, Smits G, Johnson RJ, *et al.* Increased Fructose Associates with Elevated  
37 Blood Pressure. *J Am Soc Nephrol* 2010;**21**:1543–9. doi:10.1681/ASN.2009111111  
38  
39  
40 65 Cohen L, Curhan G, Forman J. Association of sweetened beverage intake with incident  
41 hypertension. *J Gen Intern Med* 2012;**27**:1127–34. Doi:10.1007/s11606-012-2069-6  
42  
43  
44 66 Saikia N, Debbarma B. The socioeconomic correlates of substance use among male  
45 adults in Northeast India. *Clin Epidemiol Glob Heal* 2020;**8**:149–57.  
46 doi:10.1016/j.cegh.2019.06.004  
47  
48  
49  
50 67 IOM (Institute of Medicine). Patterns of Tobacco Use by Adolescents and Young  
51 Adults. In: Richard J. Bonnie, Kathleen Stratton LYK, ed. *Public Health Implications*  
52 *of Raising the Minimum Age of Legal Access to Tobacco Products*. Washington, D.C.:  
53 : The National Academies Press 2015.  
54 :  
55 :  
56 :  
57 : [https://www.ncbi.nlm.nih.gov/books/NBK310412/pdf/Bookshelf\\_NBK310412.pdf](https://www.ncbi.nlm.nih.gov/books/NBK310412/pdf/Bookshelf_NBK310412.pdf)  
58  
59 68 Maggs JL, Schulenberg JE. Initiation and Course of Alcohol Consumption among  
60

- 1  
2  
3 Adolescents and Young Adults. In: *Recent Developments in Alcoholism*. New York: :  
4 Kluwer Academic Publishers-Plenum Publishers 2005. 29–47. doi:10.1007/0-306-  
5 48626-1\_2  
6  
7  
8  
9 69 Investigators S. Effect of the Age at Which Smoking Begins on Frequency of Smoking  
10 in Adulthood. *N Engl J Med* 1991;**325**:968–9. doi:10.1056/NEJM199109263251318  
11  
12  
13 70 Dawson DA, Goldstein RB, Patricia Chou S, *et al*. Age at First Drink and the First  
14 Incidence of Adult-Onset DSM-IV Alcohol Use Disorders. *Alcohol Clin Exp Res*  
15 2008;**32**:2149–60. doi:10.1111/j.1530-0277.2008.00806.x  
16  
17  
18  
19 71 Tanihara S, Momose Y. Reasons for smoking cessation attempts among Japanese male  
20 smokers vary by nicotine dependence level: a cross-sectional study after the 2010  
21 tobacco tax increase. *BMJ Open* 2015;**5**:e006658–e006658. doi:10.1136/bmjopen-  
22 2014-006658  
23  
24  
25  
26 72 Freitas SRS, Alvim RO. Smoking and blood pressure phenotypes: New perspective for  
27 an old problem. *Am J Hypertens* 2017;**30**:554–5. doi:10.1093/ajh/hpx039  
28  
29  
30  
31 73 Saikia B, Marbaniang SP, Kumar P, *et al*. Changing pattern of tobacco consumption  
32 and quitting behavior in Northeast India. *J Subst Use* 2021;:1–12.  
33 doi:10.1080/14659891.2021.1875068  
34  
35  
36  
37 74 Wilsnack RW, Wilsnack SC, Kristjanson AF, *et al*. Gender and alcohol consumption:  
38 patterns from the multinational GENACIS project. *Addiction* 2009;**104**:1487–500.  
39 doi:10.1111/j.1360-0443.2009.02696.x  
40  
41  
42  
43 75 Nolen-Hoeksema S. Gender differences in risk factors and consequences for alcohol  
44 use and problems. *Clin Psychol Rev* 2004;**24**:981–1010. doi:10.1016/j.cpr.2004.08.003  
45  
46  
47 76 Rasiah R, Yusoff K, Mohammadreza A, *et al*. Cardiovascular disease risk factors and  
48 socioeconomic variables in a nation undergoing epidemiologic transition. *BMC Public*  
49 *Health* 2013;**13**:886. doi:10.1186/1471-2458-13-886  
50  
51  
52  
53 77 Winkleby MA, Jatulis DE, Frank E, *et al*. Socioeconomic status and health: how  
54 education, income, and occupation contribute to risk factors for cardiovascular disease.  
55 *Am J Public Health* 1992;**82**:816–20. doi:10.2105/AJPH.82.6.816  
56  
57  
58 78 Menasco M, Blair S. Gender Differences in Substance Use Across Marital Statuses. *Int*  
59 *J Criminol Sociol* 2016;**5**:1–13. doi:10.6000/1929-4409.2016.05.01  
60

- 1  
2  
3 79 Power C, Rodgers B, Hope S. Heavy alcohol consumption and marital status:  
4 disentangling the relationship in a national study of young adults. *Addiction*  
5 1999;**94**:1477–87. doi:10.1046/j.1360-0443.1999.941014774.x  
6  
7  
8  
9  
10

11 Figure 1: *Map showing the location of the Study area. Source: Authors*

12 Figure 2: *Conceptual framework of the study. Source: Authors*

13  
14  
15 Figure 3: **Item response conditional probability across the latent classes. Source: Authors**  
16  
17  
18  
19  
20  
21  
22  
23  
24  
25  
26  
27  
28  
29  
30  
31  
32  
33  
34  
35  
36  
37  
38  
39  
40  
41  
42  
43  
44  
45  
46  
47  
48  
49  
50  
51  
52  
53  
54  
55  
56  
57  
58  
59  
60

For peer review only

1  
2  
3  
4  
5  
6  
7  
8  
9  
10  
11  
12  
13  
14  
15  
16  
17  
18  
19  
20  
21  
22  
23  
24  
25  
26  
27  
28  
29  
30  
31  
32  
33  
34  
35  
36  
37  
38  
39  
40  
41  
42  
43  
44  
45  
46  
47  
48  
49  
50  
51  
52  
53  
54  
55  
56  
57  
58  
59  
60



Map showing the location of the Study area. Source: Authors

595x412mm (96 x 96 DPI)



1  
2  
3  
4  
5  
6  
7  
8  
9  
10  
11  
12  
13  
14  
15  
16  
17  
18  
19  
20  
21  
22  
23  
24  
25  
26  
27  
28  
29  
30  
31  
32  
33  
34  
35  
36  
37  
38  
39  
40  
41  
42  
43  
44  
45  
46  
47  
48  
49  
50  
51  
52  
53  
54  
55  
56  
57  
58  
59  
60



Conceptual framework of the study. Source: Authors

108x60mm (300 x 300 DPI)



Item response conditional probability across the latent classes. Source: Authors

129x84mm (300 x 300 DPI)

**STROBE 2007 (v4) Statement—Checklist of items that should be included in reports of *cross-sectional studies***

| Section/Topic                | Item # | Recommendation                                                                                                                                                                       | Reported on page # |
|------------------------------|--------|--------------------------------------------------------------------------------------------------------------------------------------------------------------------------------------|--------------------|
| <b>Title and abstract</b>    | 1      | (a) Indicate the study's design with a commonly used term in the title or the abstract                                                                                               | 1                  |
|                              |        | (b) Provide in the abstract an informative and balanced summary of what was done and what was found                                                                                  | 2                  |
| <b>Introduction</b>          |        |                                                                                                                                                                                      |                    |
| Background/rationale         | 2      | Explain the scientific background and rationale for the investigation being reported                                                                                                 | 4                  |
| Objectives                   | 3      | State specific objectives, including any prespecified hypotheses                                                                                                                     | 6                  |
| <b>Methods</b>               |        |                                                                                                                                                                                      |                    |
| Study design                 | 4      | Present key elements of study design early in the paper                                                                                                                              | 6                  |
| Setting                      | 5      | Describe the setting, locations, and relevant dates, including periods of recruitment, exposure, follow-up, and data collection                                                      | 6                  |
| Participants                 | 6      | (a) Give the eligibility criteria, and the sources and methods of selection of participants                                                                                          | 7                  |
| Variables                    | 7      | Clearly define all outcomes, exposures, predictors, potential confounders, and effect modifiers. Give diagnostic criteria, if applicable                                             | 8                  |
| Data sources/<br>measurement | 8*     | For each variable of interest, give sources of data and details of methods of assessment (measurement). Describe comparability of assessment methods if there is more than one group | 6                  |
| Bias                         | 9      | Describe any efforts to address potential sources of bias                                                                                                                            | Not applicable     |
| Study size                   | 10     | Explain how the study size was arrived at                                                                                                                                            | 7                  |
| Quantitative variables       | 11     | Explain how quantitative variables were handled in the analyses. If applicable, describe which groupings were chosen and why                                                         | Not applicable     |
| Statistical methods          | 12     | (a) Describe all statistical methods, including those used to control for confounding                                                                                                | 8                  |
|                              |        | (b) Describe any methods used to examine subgroups and interactions                                                                                                                  | Not applicable     |
|                              |        | (c) Explain how missing data were addressed                                                                                                                                          | Not applicable     |
|                              |        | (d) If applicable, describe analytical methods taking account of sampling strategy                                                                                                   | Not applicable     |
|                              |        | (e) Describe any sensitivity analyses                                                                                                                                                | Not applicable     |
| <b>Results</b>               |        |                                                                                                                                                                                      |                    |

|                          |     |                                                                                                                                                                                                              |                |
|--------------------------|-----|--------------------------------------------------------------------------------------------------------------------------------------------------------------------------------------------------------------|----------------|
| Participants             | 13* | (a) Report numbers of individuals at each stage of study—eg numbers potentially eligible, examined for eligibility, confirmed eligible, included in the study, completing follow-up, and analysed            | 9              |
|                          |     | (b) Give reasons for non-participation at each stage                                                                                                                                                         | Not applicable |
|                          |     | (c) Consider use of a flow diagram                                                                                                                                                                           | 9              |
| Descriptive data         | 14* | (a) Give characteristics of study participants (eg demographic, clinical, social) and information on exposures and potential confounders                                                                     | 10             |
|                          |     | (b) Indicate number of participants with missing data for each variable of interest                                                                                                                          | Not applicable |
| Outcome data             | 15* | Report numbers of outcome events or summary measures                                                                                                                                                         | 11             |
| Main results             | 16  | (a) Give unadjusted estimates and, if applicable, confounder-adjusted estimates and their precision (eg, 95% confidence interval). Make clear which confounders were adjusted for and why they were included | Not applicable |
|                          |     | (b) Report category boundaries when continuous variables were categorized                                                                                                                                    | Not applicable |
|                          |     | (c) If relevant, consider translating estimates of relative risk into absolute risk for a meaningful time period                                                                                             | Not applicable |
| Other analyses           | 17  | Report other analyses done—eg analyses of subgroups and interactions, and sensitivity analyses                                                                                                               | 12-13          |
| <b>Discussion</b>        |     |                                                                                                                                                                                                              |                |
| Key results              | 18  | Summarise key results with reference to study objectives                                                                                                                                                     | 14             |
| Limitations              | 19  | Discuss limitations of the study, taking into account sources of potential bias or imprecision. Discuss both direction and magnitude of any potential bias                                                   | 17             |
| Interpretation           | 20  | Give a cautious overall interpretation of results considering objectives, limitations, multiplicity of analyses, results from similar studies, and other relevant evidence                                   | 14-17          |
| Generalisability         | 21  | Discuss the generalisability (external validity) of the study results                                                                                                                                        | 17             |
| <b>Other information</b> |     |                                                                                                                                                                                                              |                |
| Funding                  | 22  | Give the source of funding and the role of the funders for the present study and, if applicable, for the original study on which the present article is based                                                | 18             |

\*Give information separately for cases and controls in case-control studies and, if applicable, for exposed and unexposed groups in cohort and cross-sectional studies.

**Note:** An Explanation and Elaboration article discusses each checklist item and gives methodological background and published examples of transparent reporting. The STROBE checklist is best used in conjunction with this article (freely available on the Web sites of PLoS Medicine at <http://www.plosmedicine.org/>, Annals of Internal Medicine at <http://www.annals.org/>, and Epidemiology at <http://www.epidem.com/>). Information on the STROBE Initiative is available at [www.strobe-statement.org](http://www.strobe-statement.org).
